# Supplementary material for: Genome Sequences of Two Strains of Prototheca wickerhamii Provide Insight Into the Protothecosis Evolution
Source: Front Cell Infect Microbiol. 2022 Feb 2;12:797017. doi: 10.3389/fcimb.2022.797017 (PMC8847788; doi:10.3389/fcimb.2022.797017)
Supplement: Supplementary file 2 [file DataSheet_2.xlsx]

## Sheet: Sheet2
Supplementary Material 1. The abundance of Pathogen-Host Interaction Database (PHI database) sequences found in P. wickerhamii and other Prototheca genomes.
No.	PHI-base entry	Pathogen gene	Pathogen species	Mutant phenotype	No. of hits in:					Hits >=10 in all speices	Total hits
					P. wickerhamii strain S1	P. wickerhamii strain S931	P. wickerhamii strain ATCC 16529	Prototheca cutis	Prototheca stagnorum
1	PHI:4475	MoTup1	Magnaporthe oryzae	loss of pathogenicity	109	96	86	98	110	Yes	499
2	PHI:211;PHI:6806	CaTUP1 Tup1	Candida albicans	reduced virulence	95	87	88	80	64	Yes	414
3	PHI:9189	BB RS14645 (BB2918)	Bordetella bronchiseptica	unaffected pathogenicity	53	51	55	56	52	Yes	267
4	PHI:3514	Asc1	Candida albicans	loss of pathogenicity	61	62	57	41	40	Yes	261
5	PHI:7220	PpsA	Mycobacterium tuberculosis	reduced virulence	52	50	49	53	47	Yes	251
6	PHI:9082	TptA (AFUA 2G14980)	Aspergillus fumigatus	reduced virulence	50	57	48	54	41	Yes	250
7	PHI:4672	AmcA	Aspergillus fumigatus	unaffected pathogenicity	51	51	46	42	28	Yes	218
8	PHI:6612	Mocapn9	Magnaporthe oryzae	unaffected pathogenicity reduced virulence	45	42	38	40	29	Yes	194
9	PHI:6510;PHI:7620	CshA Lmo0866	Listeria monocytogenes	unaffected pathogenicity increased virulence (hypervirulence)	36	36	37	40	41	Yes	190
10	PHI:7618	Lmo1246	Listeria monocytogenes	reduced virulence increased virulence (hypervirulence)	41	41	34	37	35	Yes	188
11	PHI:8011	Rhpa	Helicobacter pylori	reduced virulence	37	37	35	38	35	Yes	182
12	PHI:6111	CpcB	Aspergillus fumigatus	reduced virulence	45	41	37	28	29	Yes	180
13	PHI:2544	PAB1	Aspergillus fumigatus	lethal	36	43	38	30	32	Yes	179
14	PHI:4677	AfcpcB	Aspergillus fumigatus	reduced virulence	45	41	35	20	28	Yes	169
15	PHI:7221	Pks2	Mycobacterium tuberculosis	reduced virulence	50	36	17	18	37	Yes	158
16	PHI:1458	GzAra006	Fusarium graminearum	unaffected pathogenicity	26	25	22	33	33	Yes	139
17	PHI:867;PHI:1159	MgAtr7	Zymoseptoria tritici	unaffected pathogenicity chemistry target: sensitivity to chemical	35	29	23	20	23	Yes	130
18	PHI:1566	GzOB006	Fusarium graminearum	lethal	27	27	25	23	24	Yes	126
19	PHI:391	ABC2	Magnaporthe oryzae	unaffected pathogenicity	21	21	21	25	36	Yes	124
20	PHI:226	PEX6	Colletotrichum lagenaria	loss of pathogenicity	26	27	23	24	24	Yes	124
21	PHI:10485	DnaJ	Pseudomonas aeruginosa	reduced virulence	28	27	22	24	22	Yes	123
22	PHI:1260	FGSG 07816	Fusarium graminearum	unaffected pathogenicity	20	32	22	25	23	Yes	122
23	PHI:10379	Isw2	Verticillium dahliae	reduced virulence	24	24	18	25	25	Yes	116
24	PHI:1526	GzHOMEL036	Fusarium graminearum	unaffected pathogenicity	20	23	19	27	25	Yes	114
25	PHI:325	ACE1	Magnaporthe oryzae	effector (plant avirulence determinant)	24	16	19	29	26	Yes	114
26	PHI:1552	GzMyb016	Fusarium graminearum	unaffected pathogenicity	23	24	18	25	23	Yes	113
27	PHI:543	BCATRD	Botrytis cinerea	unaffected pathogenicity	17	23	16	22	32	Yes	110
28	PHI:1278	FGSG 11614	Fusarium graminearum	unaffected pathogenicity	20	24	22	30	13	Yes	109
29	PHI:4182	Gib2	Cryptococcus neoformans	reduced virulence	26	25	15	29	14	Yes	109
30	PHI:2552	NOP4	Aspergillus fumigatus	lethal	25	25	20	25	14	Yes	109
31	PHI:7358	KLP7	Botrytis cinerea	reduced virulence	21	24	21	21	21	Yes	108
32	PHI:423	VAD1	Cryptococcus neoformans	reduced virulence	21	23	19	19	24	Yes	106
33	PHI:7619	Lmo1450	Listeria monocytogenes	increased virulence (hypervirulence)	21	22	22	22	19	Yes	106
34	PHI:5394	Mas5	Beauveria bassiana	loss of pathogenicity	22	19	20	24	20	Yes	105
35	PHI:2815	Pdr15	Saccharomyces cerevisiae	unaffected pathogenicity	17	20	19	16	32	Yes	104
36	PHI:11203	FtsH	Corynebacterium diphtheriae	unaffected pathogenicity	21	20	20	19	22	Yes	102
37	PHI:2038	Mir1	Magnaporthe oryzae	unaffected pathogenicity	22	24	19	16	14	Yes	95
38	PHI:593	PEX6	Magnaporthe oryzae	loss of pathogenicity	20	19	20	17	19	Yes	95
39	PHI:1015	GzGPB1	Fusarium graminearum	reduced virulence	21	16	21	24	11	Yes	93
40	PHI:4733	DnaJ	Francisella tularensis	unaffected pathogenicity	19	20	18	20	12	Yes	89
41	PHI:300;PHI:2826	FGB1 Fgb1	Fusarium oxysporum	reduced virulence loss of pathogenicity	18	19	15	20	17	Yes	89
42	PHI:9222	FgPEX1 (FGSG 07104)	Fusarium graminearum	reduced virulence	18	18	15	17	18	Yes	86
43	PHI:2177	PAS1	Magnaporthe oryzae	unaffected pathogenicity	18	20	13	17	17	Yes	85
44	PHI:2310	VGB	Verticillium dahliae	reduced virulence	20	17	19	17	11	Yes	84
45	PHI:334	CGB1	Bipolaris maydis	loss of pathogenicity	21	16	21	13	11	Yes	82
46	PHI:1018;PHI:2042	ABC3	Magnaporthe oryzae	loss of pathogenicity	11	18	13	17	22	Yes	81
47	PHI:1579	GzOB019	Fusarium graminearum	unaffected pathogenicity	17	15	17	15	16	Yes	80
48	PHI:465	KIN2	Ustilago maydis	reduced virulence	15	16	16	15	16	Yes	78
49	PHI:6986	DnaJ	Streptococcus pneumoniae	reduced virulence	18	19	15	12	14	Yes	78
50	PHI:464	KIN1	Ustilago maydis	unaffected pathogenicity	16	17	14	15	15	Yes	77
51	PHI:132	ABC1	Magnaporthe oryzae	reduced virulence	20	12	13	13	17	Yes	75
52	PHI:258	GPABC1	Fusarium sambucinum	reduced virulence	20	12	17	11	15	Yes	75
53	PHI:11030	BipA	Yersinia pestis	reduced virulence	14	15	12	17	15	Yes	73
54	PHI:2033	MgPex6	Magnaporthe oryzae	loss of pathogenicity	14	14	17	12	14	Yes	71
55	PHI:6746	Mdj1	Beauveria bassiana	reduced virulence	16	16	14	14	11	Yes	71
56	PHI:5271	FabG1	Ralstonia solanacearum	lethal	13	13	15	17	13	Yes	71
57	PHI:6927	MoRAD6	Magnaporthe oryzae	reduced virulence	13	14	15	14	14	Yes	70
58	PHI:188	SNF1	Bipolaris zeicola	reduced virulence	13	13	14	14	16	Yes	70
59	PHI:4644	VPS4	Cryptococcus neoformans	loss of pathogenicity	12	13	17	13	14	Yes	69
60	PHI:10282	TufA	Staphylococcus aureus	increased virulence (hypervirulence) unaffected pathogenicity	13	14	12	17	12	Yes	68
61	PHI:8041;PHI:8048	Moubc9 Ubc9	Magnaporthe oryzae	reduced virulence	14	15	13	11	14	Yes	67
62	PHI:4169	LmSNF1	Leptosphaeria maculans	loss of pathogenicity	11	12	15	13	13	Yes	64
63	PHI:3354	RtxA1	Vibrio vulnificus	reduced virulence	5	4	3	3	4	No	19
64	PHI:4837	CipA	Pseudomonas cichorii	reduced virulence	7	4	3	2	3	No	19
65	PHI:11014	BasG	Acinetobacter baumannii	reduced virulence	1	1	2	1	1	No	6
66	PHI:5240	SecA	Acinetobacter baumannii	reduced virulence	3	3	3	4	0	No	13
67	PHI:10657	UvAtg8	Ustilaginoidea virens	reduced virulence	1	1	1	1	1	No	5
68	PHI:9481	UvCDC2 (KDB 12816.1)	Ustilaginoidea virens	reduced virulence	8	8	7	8	3	No	34
69	PHI:9163	UvBI-1	Ustilaginoidea virens	loss of pathogenicity	1	1	1	1	1	No	5
70	PHI:9480	UvPmk1 (KDB 16903.1)	Ustilaginoidea virens	reduced virulence	1	1	1	1	1	No	5
71	PHI:7257	Rs-scp-1	Radopholus similis	reduced virulence	3	3	3	3	3	No	15
72	PHI:4468	MkkA	Epichloe festucae	increased virulence (hypervirulence)	2	3	2	2	1	No	10
73	PHI:11248	Ndh	Pseudomonas aeruginosa	increased virulence (hypervirulence)	2	2	2	2	1	No	9
74	PHI:3301	PatN	Penicillium expansum	unaffected pathogenicity	1	0	1	1	0	No	3
75	PHI:7511	VK055 1961	Klebsiella pneumoniae	unaffected pathogenicity	4	5	5	5	4	No	23
76	PHI:7492	VK055 1980	Klebsiella pneumoniae	unaffected pathogenicity	4	4	4	5	2	No	19
77	PHI:7520	VK055 1952	Klebsiella pneumoniae	unaffected pathogenicity	5	7	6	5	5	No	28
78	PHI:3292	AREB	Colletotrichum gloeosporioides	reduced virulence	2	0	2	2	0	No	6
79	PHI:6342	RpiRc	Staphylococcus aureus	increased virulence (hypervirulence)	1	1	1	1	1	No	5
80	PHI:10183	PtkA	Mycobacterium tuberculosis	reduced virulence	0	0	0	1	0	No	1
81	PHI:7487	EntC (VK055 1925)	Klebsiella pneumoniae	unaffected pathogenicity reduced virulence	1	1	0	1	1	No	4
82	PHI:9838	Acs	Vibrio cholerae	reduced virulence	2	1	2	2	2	No	9
83	PHI:8968	ProV	Klebsiella pneumoniae	reduced virulence	6	5	7	7	4	No	29
84	PHI:6912	YbtP	Escherichia coli	reduced virulence	7	9	4	8	7	No	35
85	PHI:9577	PaaB	Burkholderia cenocepacia	reduced virulence	2	2	2	3	2	No	11
86	PHI:3332	Snf7	Cryptococcus gattii vgiii	loss of pathogenicity	2	2	2	2	2	No	10
87	PHI:6188	Ubp5	Cryptococcus gattii vgiii	reduced virulence	10	11	10	9	10	No	50
88	PHI:5539	CpBck1	Cryphonectria parasitica	reduced virulence	3	3	6	3	3	No	18
89	PHI:3281;PHI:4819	AS87 04050	Riemerella anatipestifer	reduced virulence	6	6	6	7	8	No	33
90	PHI:1660	GzCCCH004	Fusarium graminearum	unaffected pathogenicity	3	2	0	3	1	No	9
91	PHI:3089;PHI:4174	Fac1 Fgac1	Fusarium graminearum	reduced virulence unaffected pathogenicity	10	4	13	11	6	No	44
92	PHI:1439	GzNot001	Fusarium graminearum	lethal	2	2	3	3	4	No	14
93	PHI:1182	(Sc Mec1)	Fusarium graminearum	reduced virulence	6	6	5	5	4	No	26
94	PHI:1648;PHI:1650;PHI:6246	GzWing020 GzWing022 Famyo2	Fusarium graminearum	reduced virulence lethal	2	2	3	2	2	No	11
95	PHI:1184;PHI:6974	(Sc Gin4-like) Gil1	Fusarium graminearum	reduced virulence	2	2	2	2	2	No	10
96	PHI:10452	FPX15 (FGSG 03180)	Fusarium graminearum	unaffected pathogenicity	3	4	3	3	3	No	16
97	PHI:3038	FgERG5B	Fusarium graminearum	reduced virulence	2	2	1	1	1	No	7
98	PHI:7123	Fgvps39	Fusarium graminearum	reduced virulence	1	1	1	1	1	No	5
99	PHI:5887	FGSG 04375	Fusarium graminearum	unaffected pathogenicity	8	15	13	15	10	No	61
100	PHI:3833	Fgrho2	Fusarium graminearum	reduced virulence	0	0	0	1	1	No	2
101	PHI:1088	FGSG 09759	Fusarium graminearum	unaffected pathogenicity	1	1	2	1	1	No	6
102	PHI:4865;PHI:9156	FgVam7	Fusarium graminearum	loss of pathogenicity reduced virulence	1	1	1	1	0	No	4
103	PHI:1408	GzC2H072	Fusarium graminearum	unaffected pathogenicity	1	1	1	1	1	No	5
104	PHI:2386	ACL1	Fusarium graminearum	loss of pathogenicity	2	2	2	2	2	No	10
105	PHI:1195	(Sc Bck1)	Fusarium graminearum	reduced virulence	4	6	4	5	1	No	20
106	PHI:1621	GzRUM1	Fusarium graminearum	unaffected pathogenicity	7	6	4	7	4	No	28
107	PHI:10423	Kmt2	Metarhizium robertsii	reduced virulence	6	5	4	5	5	No	25
108	PHI:8720	PeImp	Penicillium expansum	unaffected pathogenicity	1	1	2	1	1	No	6
109	PHI:10404	SntB	Penicillium expansum	reduced virulence	1	1	1	1	0	No	4
110	PHI:8722;PHI:8724	PeCat PeSat	Penicillium expansum	unaffected pathogenicity reduced virulence	2	1	2	2	2	No	9
111	PHI:8723	PeTrx	Penicillium expansum	unaffected pathogenicity	2	2	3	1	2	No	10
112	PHI:7815	Mst2	Beauveria bassiana	reduced virulence	1	2	2	3	2	No	10
113	PHI:4609	BxCYP33D3	Bursaphelenchus xylophilus	reduced virulence	0	1	0	1	1	No	3
114	PHI:9556	WbiG	Burkholderia glumae	unaffected pathogenicity	4	4	1	4	2	No	15
115	PHI:6320	PotB	Streptococcus pneumoniae	reduced virulence	1	0	1	1	0	No	3
116	PHI:7682	Nit1	Fusarium oxysporum	unaffected pathogenicity	7	6	6	6	5	No	30
117	PHI:10249	Fmk1 (FOXG 08140)	Fusarium oxysporum	reduced virulence	0	0	0	1	0	No	1
118	PHI:5587	PqsC	Pseudomonas aeruginosa	unaffected pathogenicity	1	1	1	1	1	No	5
119	PHI:7046	Aox1	Ustilago maydis	unaffected pathogenicity	0	1	1	1	1	No	4
120	PHI:9205	Hrd1 (UMAG 00542)	Ustilago maydis	unaffected pathogenicity	3	3	3	2	4	No	15
121	PHI:9207	Der1 (UMAG 05898)	Ustilago maydis	unaffected pathogenicity	2	2	2	2	2	No	10
122	PHI:9208	Der2 (UMAG 11402)	Ustilago maydis	unaffected pathogenicity	2	2	2	2	2	No	10
123	PHI:9867	Pdi (UMAG 10156)	Ustilago maydis	reduced virulence unaffected pathogenicity	12	10	8	11	11	No	52
124	PHI:9204	Spp1 (UMAG 02729)	Ustilago maydis	loss of pathogenicity	2	2	2	2	2	No	10
125	PHI:10879	Cnb1 (XP 018234243)	Fusarium oxysporum	reduced virulence	4	4	3	3	2	No	16
126	PHI:9050	FolVam7 (FOXG 02319)	Fusarium oxysporum	reduced virulence	1	1	1	1	0	No	4
127	PHI:10695	CrpF (FOXG 03265)	Fusarium oxysporum	unaffected pathogenicity increased virulence (hypervirulence)	1	6	3	3	4	No	17
128	PHI:9288	Rec8 (FOXG 03390)	Fusarium oxysporum	unaffected pathogenicity	1	1	1	1	0	No	4
129	PHI:4723	Gnn1	Fusarium oxysporum	unaffected pathogenicity	1	1	1	1	2	No	6
130	PHI:11121	Pct6 (FOXG 07912)	Fusarium oxysporum	reduced virulence	3	3	3	4	2	No	15
131	PHI:5236	Dnj1	Fusarium oxysporum	reduced virulence	5	3	4	7	4	No	23
132	PHI:9745	FolVPS21 (FOXG 09392)	Fusarium oxysporum	reduced virulence	2	3	2	1	2	No	10
133	PHI:7588	Foatg8	Fusarium oxysporum	reduced virulence	1	1	1	1	1	No	5
134	PHI:4725	Gbe1	Fusarium oxysporum	unaffected pathogenicity	3	4	3	6	3	No	19
135	PHI:4750	ChPMA2	Colletotrichum higginsianum	loss of pathogenicity	1	1	1	1	1	No	5
136	PHI:8812	CopA (ABUW 2707)	Acinetobacter baumannii	unaffected pathogenicity reduced virulence	6	11	4	7	4	No	32
137	PHI:2395	GzSYN1	Fusarium graminearum	reduced virulence	1	1	1	1	1	No	5
138	PHI:1572	GzOB012	Fusarium graminearum	unaffected pathogenicity	3	2	3	3	3	No	14
139	PHI:1662	GzCCHC002	Fusarium graminearum	unaffected pathogenicity	1	1	1	1	1	No	5
140	PHI:1239	FGSG 02399	Fusarium graminearum	unaffected pathogenicity	4	3	5	4	4	No	20
141	PHI:3983	FGSG 02509.3 (Sc gpi7)	Fusarium graminearum	reduced virulence	1	1	1	1	1	No	5
142	PHI:1556	GzNH001	Fusarium graminearum	reduced virulence	1	0	0	3	1	No	5
143	PHI:1603	GzOB044	Fusarium graminearum	unaffected pathogenicity	3	3	3	2	2	No	13
144	PHI:1235;PHI:9823	FGSG 08731 Fg08731	Fusarium graminearum	lethal reduced virulence	4	4	3	3	4	No	18
145	PHI:9097	Fgist1 (FGSG 12578)	Fusarium graminearum	reduced virulence	2	1	1	1	0	No	5
146	PHI:1266;PHI:4942	FGSG 03132 Cdc2B	Fusarium graminearum	unaffected pathogenicity lethal	6	6	6	5	4	No	27
147	PHI:8646	FgLDHL2 (FGSG 16220)	Fusarium graminearum	reduced virulence	4	4	4	2	5	No	19
148	PHI:5780	Fgsg04051	Fusarium graminearum	unaffected pathogenicity	2	2	2	2	2	No	10
149	PHI:1229	FGSG 06637	Fusarium graminearum	lethal	3	4	5	5	5	No	22
150	PHI:1207;PHI:3178	FgKin1	Fusarium graminearum	reduced virulence	4	4	4	1	1	No	14
151	PHI:6259	DOHH	Fusarium graminearum	reduced virulence unaffected pathogenicity	2	2	3	2	2	No	11
152	PHI:1503	GzHMG035	Fusarium graminearum	unaffected pathogenicity	5	5	5	5	3	No	23
153	PHI:1272	FGSG 09492	Fusarium graminearum	unaffected pathogenicity	0	0	1	3	2	No	6
154	PHI:2716	PEX7	Fusarium graminearum	unaffected pathogenicity	4	1	4	3	5	No	17
155	PHI:2355	AMT4	Fusarium graminearum	reduced virulence	1	1	1	1	2	No	6
156	PHI:1016;PHI:1191;PHI:3376	STE11 (Sc Ste11) FgSte11	Fusarium graminearum	loss of pathogenicity reduced virulence	4	5	5	6	4	No	24
157	PHI:1252	FGSG 05764	Fusarium graminearum	unaffected pathogenicity	2	3	2	1	1	No	9
158	PHI:1653	GzWing026	Fusarium graminearum	unaffected pathogenicity	1	1	1	1	1	No	5
159	PHI:1659	GzCCCH003	Fusarium graminearum	unaffected pathogenicity	1	1	1	1	1	No	5
160	PHI:1450	GzGATA008	Fusarium graminearum	lethal	2	0	2	2	0	No	6
161	PHI:3036	FgERG3B	Fusarium graminearum	reduced virulence	2	2	2	1	2	No	9
162	PHI:1429	GzC2H097	Fusarium graminearum	unaffected pathogenicity	2	2	2	2	2	No	10
163	PHI:1553	GzMyb017	Fusarium graminearum	reduced virulence	2	2	2	2	2	No	10
164	PHI:1678	GzGRF	Fusarium graminearum	unaffected pathogenicity	1	1	1	1	0	No	4
165	PHI:7069	HtrA	Listeria monocytogenes	reduced virulence unaffected pathogenicity	2	2	0	2	2	No	8
166	PHI:6913	YbtQ	Escherichia coli	reduced virulence	5	5	6	8	7	No	31
167	PHI:7263	CspE	Salmonella enterica	reduced virulence loss of pathogenicity unaffected pathogenicity	1	0	1	1	1	No	4
168	PHI:7211	STM14 1002	Salmonella enterica	reduced virulence	0	1	1	1	1	No	4
169	PHI:7212	STM14 1003	Salmonella enterica	reduced virulence	1	1	1	1	1	No	5
170	PHI:7214	STM14 1005	Salmonella enterica	reduced virulence	4	4	4	4	2	No	18
171	PHI:7216	STM14 1007	Salmonella enterica	reduced virulence	1	1	1	1	1	No	5
172	PHI:6893;PHI:10099	SufB STM14 RS07705 (sufB)	Salmonella enterica	unaffected pathogenicity reduced virulence	1	1	1	2	1	No	6
173	PHI:10100	STM14 RS07710 (sufC)	Salmonella enterica	reduced virulence	1	1	1	1	1	No	5
174	PHI:10101	STM14 RS07715 (sufD)	Salmonella enterica	reduced virulence	2	1	2	2	1	No	8
175	PHI:10102	STM14 RS07720 (sufS)	Salmonella enterica	reduced virulence	2	2	2	4	2	No	12
176	PHI:10103	STM14 RS07725 (ynhA/sufE)	Salmonella enterica	reduced virulence	2	2	2	1	0	No	7
177	PHI:10107	STM14 RS07745 (pykF)	Salmonella enterica	reduced virulence	3	5	5	5	5	No	23
178	PHI:10109	STM14 RS07750 (orf48)	Salmonella enterica	reduced virulence	1	1	0	1	1	No	4
179	PHI:10110	STM14 RS07755 (orf32)	Salmonella enterica	reduced virulence	0	0	0	1	0	No	1
180	PHI:10112	STM14 RS07765 (orf408)	Salmonella enterica	reduced virulence	1	1	1	1	0	No	4
181	PHI:7225	YdcR	Salmonella enterica	reduced virulence	4	5	4	3	3	No	19
182	PHI:7657	PspA	Salmonella enterica	reduced virulence unaffected pathogenicity	1	0	1	1	1	No	4
183	PHI:10055	STM14 RS15210 (srlD)	Salmonella enterica	unaffected pathogenicity	0	0	1	1	0	No	2
184	PHI:10059	STM14 RS15230	Salmonella enterica	unaffected pathogenicity	2	1	1	2	1	No	7
185	PHI:10062	STM14 RS15245	Salmonella enterica	unaffected pathogenicity	0	3	2	1	1	No	7
186	PHI:10068	STM14 RS15275	Salmonella enterica	unaffected pathogenicity	0	0	1	1	1	No	3
187	PHI:10069	STM14 RS15280	Salmonella enterica	unaffected pathogenicity	1	1	1	1	1	No	5
188	PHI:10083	STM14 RS15350	Salmonella enterica	unaffected pathogenicity	4	1	0	2	2	No	9
189	PHI:7735	PbCYP3	Magnaporthe oryzae	reduced virulence	9	11	12	11	11	No	54
190	PHI:5547	Prc	Xanthomonas campestris	reduced virulence	0	0	0	1	0	No	1
191	PHI:7344	PurA	Staphylococcus aureus	reduced virulence	1	1	1	1	1	No	5
192	PHI:7589	CtpA	Staphylococcus aureus	reduced virulence	0	0	0	1	0	No	1
193	PHI:6628	BcaP	Staphylococcus aureus	unaffected pathogenicity reduced virulence	2	2	3	3	1	No	11
194	PHI:2634	ArgF	Staphylococcus aureus	unaffected pathogenicity	2	2	2	2	2	No	10
195	PHI:7346	PabA	Staphylococcus aureus	reduced virulence	4	4	4	4	1	No	17
196	PHI:7305	PhzG2	Pseudomonas aeruginosa	reduced virulence	1	1	1	1	1	No	5
197	PHI:10606	FadD1 (PA14 21370)	Pseudomonas aeruginosa	unaffected pathogenicity	6	6	8	9	8	No	37
198	PHI:7817	PA14 23420 (zbdP)	Pseudomonas aeruginosa	unaffected pathogenicity	0	0	0	1	0	No	1
199	PHI:10607	FadD6 (PA14 13110)	Pseudomonas aeruginosa	unaffected pathogenicity	3	6	5	7	2	No	23
200	PHI:7298	PhzG1	Pseudomonas aeruginosa	reduced virulence	1	1	1	1	1	No	5
201	PHI:7294	PhzC1	Pseudomonas aeruginosa	reduced virulence	1	1	1	1	1	No	5
202	PHI:7297;PHI:7304	PhzF1 PhzF2	Pseudomonas aeruginosa	reduced virulence	1	1	1	1	1	No	5
203	PHI:7301	PhzC2	Pseudomonas aeruginosa	reduced virulence	1	1	1	1	1	No	5
204	PHI:7798	Spd1836	Streptococcus pneumoniae	reduced virulence	6	3	6	3	1	No	19
205	PHI:4960	RsmI	Staphylococcus aureus	reduced virulence	1	1	1	1	0	No	4
206	PHI:6579	VraD	Staphylococcus aureus	reduced virulence	6	7	4	6	3	No	26
207	PHI:7917	NWMN 0826	Staphylococcus aureus	reduced virulence	1	2	1	1	3	No	8
208	PHI:10875	HK2 (BB0763)	Borreliella burgdorferi	reduced virulence	7	8	5	7	6	No	33
209	PHI:9184	BscN	Bordetella bronchiseptica	unaffected pathogenicity	1	4	2	3	2	No	12
210	PHI:11113	PknH	Mycobacterium tuberculosis	reduced virulence	0	0	0	1	1	No	2
211	PHI:9496	YeaB	Salmonella enterica	reduced virulence	1	0	1	1	1	No	4
212	PHI:10727	PepP (CJJ81176 0681)	Campylobacter jejuni	reduced virulence	1	1	2	1	1	No	6
213	PHI:9843	AckA	Vibrio cholerae	unaffected pathogenicity	1	1	1	1	1	No	5
214	PHI:6698	Edd	Vibrio cholerae	reduced virulence	1	1	1	1	1	No	5
215	PHI:9744	FolVPS9 (FOXG 00470)	Fusarium oxysporum	reduced virulence	1	0	1	1	1	No	4
216	PHI:7683	Nit2	Fusarium oxysporum	unaffected pathogenicity	7	6	6	5	5	No	29
217	PHI:10878	Cna1 (XP 018243626)	Fusarium oxysporum	reduced virulence	2	2	1	1	1	No	7
218	PHI:9287	Rad21nc (FOXG 15850)	Fusarium oxysporum	unaffected pathogenicity	1	1	1	1	0	No	4
219	PHI:6955	GigX3	Xanthomonas oryzae	increased virulence (hypervirulence)	1	1	1	1	1	No	5
220	PHI:6958	GigX6	Xanthomonas oryzae	increased virulence (hypervirulence)	2	2	2	1	1	No	8
221	PHI:9982	ThrC (PXO 00822)	Xanthomonas oryzae	reduced virulence	1	1	0	1	1	No	4
222	PHI:9983	HisD (PXO 00833)	Xanthomonas oryzae	reduced virulence	1	1	1	1	1	No	5
223	PHI:8639	CspD ( WP 003488188.1)	Xanthomonas oryzae	unaffected pathogenicity	0	0	0	1	1	No	2
224	PHI:8987	PXO RS15740	Xanthomonas oryzae	unaffected pathogenicity	0	2	0	3	0	No	5
225	PHI:9979	LeuB (PXO 02610)	Xanthomonas oryzae	reduced virulence	3	2	2	2	2	No	11
226	PHI:9989	AspC (PXO 02420)	Xanthomonas oryzae	reduced virulence	8	8	6	7	7	No	36
227	PHI:9986	MetB (PXO 03157)	Xanthomonas oryzae	reduced virulence	3	2	3	3	5	No	16
228	PHI:9250	PsRPs26	Puccinia striiformis	reduced virulence	1	1	1	1	1	No	5
229	PHI:6892	IscU	Salmonella enterica	reduced virulence	1	1	1	1	1	No	5
230	PHI:6894	SufC	Salmonella enterica	unaffected pathogenicity	1	1	1	1	1	No	5
231	PHI:11008	RsmA	Pseudomonas amygdali	unaffected pathogenicity reduced virulence	1	1	2	2	3	No	9
232	PHI:6090	KatE	Acinetobacter nosocomialis	increased virulence (hypervirulence)	0	1	1	1	1	No	4
233	PHI:9816	TreS	Ralstonia solanacearum	reduced virulence	1	1	1	1	1	No	5
234	PHI:7061;PHI:8755	AroA	Salmonella enterica	unaffected pathogenicity reduced virulence	0	1	1	1	1	No	4
235	PHI:7062	AroD	Salmonella enterica	unaffected pathogenicity	1	1	0	1	1	No	4
236	PHI:7866	Lon	Xanthomonas citri	increased virulence (hypervirulence) reduced virulence unaffected pathogenicity	0	0	0	4	2	No	6
237	PHI:6469	CgSmt3	Candida glabrata	lethal	1	1	1	1	1	No	5
238	PHI:6405	Hmgb2	Plasmodium berghei	reduced virulence	2	2	2	2	1	No	9
239	PHI:8932	AdhE	Streptococcus suis	reduced virulence	2	2	2	2	2	No	10
240	PHI:11103	AAT	Toxoplasma gondii	unaffected pathogenicity reduced virulence	2	3	2	2	2	No	11
241	PHI:7744	ANK1 (TGME49 216140)	Toxoplasma gondii	reduced virulence	1	1	2	2	2	No	8
242	PHI:10571	Rab11A	Toxoplasma gondii	reduced virulence	9	10	8	9	9	No	45
243	PHI:11102	SIR2 (MGG 10267)	Magnaporthe oryzae	unaffected pathogenicity	4	3	4	2	3	No	16
244	PHI:10160	KsgA	Acinetobacter baumannii	reduced virulence	1	1	2	2	2	No	8
245	PHI:6447	RarA	Klebsiella pneumoniae	reduced virulence	3	1	3	3	1	No	11
246	PHI:6512	LplA1	Listeria monocytogenes	reduced virulence	0	1	0	1	0	No	2
247	PHI:10418	AaBre1	Alternaria alternata	reduced virulence	1	1	1	1	1	No	5
248	PHI:8000	Csn5	Alternaria alternata	reduced virulence	4	4	4	5	3	No	20
249	PHI:11037	NRPS14 (VM1G 03342)	Valsa mali	increased virulence (hypervirulence) unaffected pathogenicity	2	2	2	6	4	No	16
250	PHI:11035	VmGP (VM1G 06866)	Valsa mali	reduced virulence	0	1	2	2	2	No	7
251	PHI:10182	Pmk1	Valsa mali	reduced virulence	1	1	2	1	1	No	6
252	PHI:11042	PKS39 (VM1G 09018)	Valsa mali	unaffected pathogenicity	11	11	8	7	9	No	46
253	PHI:8586	MntH1	Enterococcus faecalis	unaffected pathogenicity reduced virulence	1	2	2	3	4	No	12
254	PHI:10253	CHCAP (CH63R 04510)	Colletotrichum higginsianum	reduced virulence	1	1	1	1	1	No	5
255	PHI:10666	VPS9 (FGRAMPH1 01G01477)	Fusarium graminearum	reduced virulence	1	0	1	1	0	No	3
256	PHI:1563	GzOB003	Fusarium graminearum	unaffected pathogenicity	1	1	1	1	1	No	5
257	PHI:1544;PHI:1545	GzMyb008 GzMyb009	Fusarium graminearum	unaffected pathogenicity lethal	0	0	0	1	0	No	1
258	PHI:1185	(Sc Swe1)	Fusarium graminearum	reduced virulence	2	3	2	2	1	No	10
259	PHI:1186	(Sc Cdc15)	Fusarium graminearum	reduced virulence	10	13	9	6	4	No	42
260	PHI:1211	(Sc Ctk1)	Fusarium graminearum	reduced virulence	1	1	1	1	2	No	6
261	PHI:1183	(Sc Cmk1/Cmk2)	Fusarium graminearum	reduced virulence	1	0	1	2	1	No	5
262	PHI:5896	FGSG 11405	Fusarium graminearum	unaffected pathogenicity	1	1	1	1	2	No	6
263	PHI:1202	(Sc Cla4)	Fusarium graminearum	reduced virulence	1	1	0	1	1	No	4
264	PHI:1385	GzC2H048	Fusarium graminearum	unaffected pathogenicity	4	3	4	4	3	No	18
265	PHI:9973	Srp2 (FGSG 09282)	Fusarium graminearum	reduced virulence	7	6	5	3	5	No	26
266	PHI:5892	FGSG 09382	Fusarium graminearum	unaffected pathogenicity	3	4	4	4	1	No	16
267	PHI:1206	(Sp Prp4)	Fusarium graminearum	reduced virulence	6	7	7	7	6	No	33
268	PHI:9225;PHI:9544	CaPsy2 PSY2	Candida albicans	increased virulence (hypervirulence)	1	1	1	1	0	No	4
269	PHI:6803	Cla4	Candida albicans	unaffected pathogenicity	1	1	1	1	1	No	5
270	PHI:11028	Rsc4	Candida albicans	reduced virulence unaffected pathogenicity	1	1	1	1	0	No	4
271	PHI:10528	Rad23	Candida albicans	reduced virulence unaffected pathogenicity	1	2	1	2	2	No	8
272	PHI:7010	Arf3	Candida albicans	unaffected pathogenicity	4	4	4	4	5	No	21
273	PHI:8905	VMA6	Candida albicans	reduced virulence	1	1	1	1	1	No	5
274	PHI:9524	ADH1	Candida albicans	reduced virulence	3	4	4	4	2	No	17
275	PHI:9146	CaCDC50 (orf19.5735)	Candida albicans	reduced virulence	1	1	1	1	1	No	5
276	PHI:9542	PTC2	Candida albicans	unaffected pathogenicity reduced virulence increased virulence (hypervirulence)	8	12	12	12	10	No	54
277	PHI:9226;PHI:9543	CaPph3 PPH3	Candida albicans	increased virulence (hypervirulence) reduced virulence	5	5	4	6	5	No	25
278	PHI:9278	CDC43	Candida albicans	unaffected pathogenicity	2	2	1	2	1	No	8
279	PHI:7737;PHI:9520	SsNsd1 Ssnsd1	Sclerotinia sclerotiorum	loss of pathogenicity reduced virulence	0	0	1	2	0	No	3
280	PHI:8744	Bx-cpl-1	Bursaphelenchus xylophilus	reduced virulence	6	8	10	8	7	No	39
281	PHI:10950	Pks	Aspergillus carbonarius	unaffected pathogenicity	12	13	7	7	1	No	40
282	PHI:7447	CpSlt2	Cryphonectria parasitica	reduced virulence	2	2	1	2	3	No	10
283	PHI:8508	AS87 RS09170 (bioF)	Riemerella anatipestifer	increased virulence (hypervirulence) reduced virulence	3	3	3	3	3	No	15
284	PHI:7243	Pks15	Beauveria bassiana	reduced virulence	6	7	5	3	3	No	24
285	PHI:8768	Chk1	Cryptococcus neoformans	unaffected pathogenicity reduced virulence	1	1	0	1	1	No	4
286	PHI:8767	Rad53	Cryptococcus neoformans	unaffected pathogenicity reduced virulence	1	2	1	2	4	No	10
287	PHI:7708	VEDA 05198	Verticillium dahliae	reduced virulence unaffected pathogenicity increased virulence (hypervirulence)	1	4	4	3	0	No	12
288	PHI:7709	VEDA 05199	Verticillium dahliae	reduced virulence unaffected pathogenicity	1	1	1	1	1	No	5
289	PHI:7707	VEDA 05197	Verticillium dahliae	reduced virulence unaffected pathogenicity increased virulence (hypervirulence)	0	1	1	3	1	No	6
290	PHI:8936	HtrA	Bacillus anthracis	reduced virulence unaffected pathogenicity	1	1	1	1	1	No	5
291	PHI:11257	FoMep1	Fusarium oxysporum	reduced virulence	1	1	1	1	1	No	5
292	PHI:9924	BcsQ (yhjQ BGLU RS28225)	Burkholderia glumae	reduced virulence	1	1	1	1	1	No	5
293	PHI:10540	Lon	Dickeya solani	reduced virulence	4	4	4	4	4	No	20
294	PHI:9550	Mocin4	Magnaporthe oryzae	reduced virulence	3	2	3	3	2	No	13
295	PHI:10445	ClpB	Francisella tularensis	reduced virulence unaffected pathogenicity	3	4	5	3	3	No	18
296	PHI:11132	Fab1	Aspergillus flavus	reduced virulence	4	3	2	5	4	No	18
297	PHI:8587	MntH2	Enterococcus faecalis	unaffected pathogenicity reduced virulence	1	2	2	3	4	No	12
298	PHI:9451	PitA	Staphylococcus aureus	unaffected pathogenicity reduced virulence	1	1	1	2	1	No	6
299	PHI:9351	Pyk1	Toxoplasma gondii	reduced virulence	2	3	4	4	5	No	18
300	PHI:10610	LpxA	Acinetobacter baumannii	reduced virulence	2	2	2	1	1	No	8
301	PHI:10889	CzcD	Campylobacter jejuni	reduced virulence	2	2	1	1	2	No	8
302	PHI:10735	Jar1 (BCIN 02g00190)	Botrytis cinerea	reduced virulence	8	7	5	7	4	No	31
303	PHI:10665	RPD3 (Bcin05g02590)	Botrytis cinerea	reduced virulence	4	2	3	3	3	No	15
304	PHI:11184	BcCyp2 (BCIN 05g03080)	Botrytis cinerea	reduced virulence	7	9	8	11	7	No	42
305	PHI:8733	BcKDM1 (Bcin07g03050)	Botrytis cinerea	reduced virulence	2	2	2	3	2	No	11
306	PHI:9835	Bcpgd	Botrytis cinerea	reduced virulence	1	1	1	1	1	No	5
307	PHI:9903	Bcser2 (Bcin08g02990)	Botrytis cinerea	reduced virulence	3	3	3	4	5	No	18
308	PHI:9902	Bcser1 (Bcin10g02530)	Botrytis cinerea	unaffected pathogenicity reduced virulence	3	3	3	2	3	No	14
309	PHI:10369	BcBGL5 (BCIN 14g00650)	Botrytis cinerea	reduced virulence	3	3	3	4	3	No	16
310	PHI:10434	BcactA (Bcin16g02020)	Botrytis cinerea	reduced virulence	7	7	5	8	3	No	30
311	PHI:10287	AroE	Staphylococcus aureus	unaffected pathogenicity increased virulence (hypervirulence)	1	1	0	1	1	No	4
312	PHI:8746	Bx-cpl-3	Bursaphelenchus xylophilus	reduced virulence	6	8	10	8	6	No	38
313	PHI:8745	Bx-cpl-2	Bursaphelenchus xylophilus	reduced virulence	6	8	10	8	6	No	38
314	PHI:11118	NoxA	Fusarium oxysporum	unaffected pathogenicity	0	0	0	1	0	No	1
315	PHI:9220	AbSte7 (MH559277)	Alternaria brassicicola	reduced virulence	1	1	1	2	1	No	6
316	PHI:11111	BxATG9	Bursaphelenchus xylophilus	reduced virulence	1	1	1	1	2	No	6
317	PHI:11112	BxATG16	Bursaphelenchus xylophilus	reduced virulence	7	5	5	3	4	No	24
318	PHI:9575	OvrA	Escherichia coli	reduced virulence	1	1	1	1	0	No	4
319	PHI:10510	Ggt	Acinetobacter baumannii	reduced virulence	1	1	1	1	0	No	4
320	PHI:10975	PbSERA4 (PBANKA 0304800)	Plasmodium berghei	reduced virulence	0	1	1	1	0	No	3
321	PHI:10587	KduD	Pectobacterium carotovorum	unaffected pathogenicity	8	7	9	7	9	No	40
322	PHI:9933	LysX	Mycobacterium avium	increased virulence (hypervirulence)	3	3	3	3	4	No	16
323	PHI:10496	Ofd1	Monilinia fructicola	reduced virulence	2	2	2	2	2	No	10
324	PHI:10495	SEN1008	Salmonella enterica	reduced virulence	1	0	0	3	1	No	5
325	PHI:11088	MetC (MN812274)	Alternaria alternata	reduced virulence	3	2	2	1	4	No	12
326	PHI:7990	LysX	Mycobacterium avium	increased virulence (hypervirulence)	3	3	3	2	3	No	14
327	PHI:1047	CTB6	Cercospora nicotianae	reduced virulence	1	1	1	1	13	No	17
328	PHI:3918	Fer2	Ustilago maydis	reduced virulence	2	2	1	2	2	No	9
329	PHI:1031	BcSAK1	Botrytis cinerea	reduced virulence	1	1	0	1	1	No	4
330	PHI:7671	YbeY	Yersinia enterocolitica	reduced virulence	1	1	1	1	1	No	5
331	PHI:6863	Pnp	Neisseria meningitidis	reduced virulence	3	3	3	2	2	No	13
332	PHI:1038;PHI:1039;PHI:2275	Ku70	Claviceps purpurea	unaffected pathogenicity loss of pathogenicity	1	0	1	1	1	No	4
333	PHI:7860	RpoB	Acinetobacter baumannii	reduced virulence	4	3	4	4	4	No	19
334	PHI:10380	RecA	Acinetobacter baumannii	reduced virulence	2	2	1	2	3	No	10
335	PHI:10701	HisF (A1S 3245)	Acinetobacter baumannii	reduced virulence unaffected pathogenicity	1	1	1	1	1	No	5
336	PHI:3533	LonA	Actinobacillus pleuropneumoniae	reduced virulence	2	4	4	2	0	No	12
337	PHI:8927	MoSCAD1 (MGG 05096)	Magnaporthe oryzae	reduced virulence loss of pathogenicity	4	5	3	6	2	No	20
338	PHI:5187	MoCCP1	Magnaporthe oryzae	reduced virulence	2	1	2	2	1	No	8
339	PHI:5234	MoARG7	Magnaporthe oryzae	reduced virulence	1	2	1	1	1	No	6
340	PHI:6135;PHI:6636	PEF1 MoMdv1	Magnaporthe oryzae	reduced virulence	6	7	7	9	9	No	38
341	PHI:4076	BgaC	Streptococcus suis	unaffected pathogenicity	2	1	1	1	1	No	6
342	PHI:9270;PHI:11090	MnmE	Streptococcus suis	reduced virulence	4	5	1	4	5	No	19
343	PHI:11234	Eno	Streptococcus suis	unaffected pathogenicity	0	0	0	1	1	No	2
344	PHI:6276	SspA-1	Streptococcus suis	reduced virulence	1	1	1	2	0	No	5
345	PHI:9338	Pdh	Streptococcus suis	reduced virulence	2	2	2	2	2	No	10
346	PHI:11091	GidA	Streptococcus suis	reduced virulence	1	1	1	1	1	No	5
347	PHI:3028	Vatr2	Clavibacter michiganensis	reduced virulence	2	3	3	4	1	No	13
348	PHI:4108	FadD	Vibrio cholerae	reduced virulence unaffected pathogenicity	4	3	7	6	6	No	26
349	PHI:11263	ProA	Legionella pneumophila	reduced virulence	1	2	1	1	1	No	6
350	PHI:4210	NifS	Mycoplasma agalactiae	loss of pathogenicity	2	2	2	3	2	No	11
351	PHI:4610	PdhB	Mycoplasma agalactiae	reduced virulence	3	3	3	3	1	No	13
352	PHI:6517	AdhT	Mycoplasma agalactiae	reduced virulence	4	4	4	4	2	No	18
353	PHI:3999	FMT	Staphylococcus aureus	reduced virulence	2	3	2	1	1	No	9
354	PHI:3004	ClpX	Staphylococcus aureus	reduced virulence	4	4	3	3	4	No	18
355	PHI:8034	BcATG8	Botrytis cinerea	reduced virulence	1	1	1	1	1	No	5
356	PHI:6159	BcATG1	Botrytis cinerea	loss of pathogenicity reduced virulence	2	2	1	2	3	No	10
357	PHI:7877	BcAtg3	Botrytis cinerea	reduced virulence	1	1	1	1	1	No	5
358	PHI:7951	ArnA	Klebsiella pneumoniae	unaffected pathogenicity	1	3	2	3	2	No	11
359	PHI:7950	ArnC	Klebsiella pneumoniae	unaffected pathogenicity	2	2	1	1	2	No	8
360	PHI:7949	ArnB	Klebsiella pneumoniae	unaffected pathogenicity	1	1	1	1	0	No	4
361	PHI:11003	SS1G 00102 (SsCCS)	Sclerotinia sclerotiorum	reduced virulence increased virulence (hypervirulence)	1	1	1	1	1	No	5
362	PHI:8883	SsTrr1 (SS1G 05899)	Sclerotinia sclerotiorum	reduced virulence	0	0	2	1	0	No	3
363	PHI:3329	Ss-oah1	Sclerotinia sclerotiorum	reduced virulence	0	0	0	1	0	No	1
364	PHI:9519	SsFdh1 (SS1G 10135)	Sclerotinia sclerotiorum	reduced virulence	2	2	2	1	1	No	8
365	PHI:11004	SS1G 10888 (SsATX1)	Sclerotinia sclerotiorum	reduced virulence increased virulence (hypervirulence)	1	1	1	1	1	No	5
366	PHI:7696	THR1	Sclerotinia sclerotiorum	unaffected pathogenicity	0	0	0	1	1	No	2
367	PHI:2411	Ss-ggt1	Sclerotinia sclerotiorum	reduced virulence	2	2	1	1	0	No	6
368	PHI:8906	HtrA	Campylobacter jejuni	reduced virulence	1	2	2	1	0	No	6
369	PHI:4020	HmgA	Vibrio campbellii	reduced virulence	1	1	0	1	0	No	3
370	PHI:2058	LHS1	Magnaporthe oryzae	reduced virulence	6	5	8	6	7	No	32
371	PHI:7004	CapB2	Staphylococcus aureus	reduced virulence	0	0	0	1	1	No	2
372	PHI:8019	AtpG	Staphylococcus aureus	reduced virulence	1	2	1	2	1	No	7
373	PHI:1083;PHI:2272	CpkB	Parastagonospora nodorum	unaffected pathogenicity	5	8	6	9	6	No	34
374	PHI:2304	BCFHG1	Botrytis cinerea	unaffected pathogenicity	0	0	0	1	0	No	1
375	PHI:3523	Bx-Prx	Bursaphelenchus xylophilus	loss of pathogenicity	3	4	3	3	3	No	16
376	PHI:2317	Aapk1	Alternaria alternata	reduced virulence	2	1	2	2	1	No	8
377	PHI:9565	LeuC (AFUB 014560)	Aspergillus fumigatus	reduced virulence loss of pathogenicity	2	1	1	1	1	No	6
378	PHI:4248	PerA	Aspergillus fumigatus	reduced virulence	1	1	1	1	1	No	5
379	PHI:6977	Erg4A	Aspergillus fumigatus	unaffected pathogenicity	0	0	1	1	2	No	4
380	PHI:9183	SsdA (AFUB 010850)	Aspergillus fumigatus	reduced virulence increased virulence (hypervirulence)	4	4	4	3	3	No	18
381	PHI:9564	LeuA (AFUB 027020)	Aspergillus fumigatus	reduced virulence	3	3	3	3	3	No	15
382	PHI:2293	CycA	Aspergillus fumigatus	reduced virulence	1	0	1	1	1	No	4
383	PHI:2292	AoxA	Aspergillus fumigatus	unaffected pathogenicity	0	1	1	1	1	No	4
384	PHI:6976	Erg4B	Aspergillus fumigatus	unaffected pathogenicity	0	1	1	1	1	No	4
385	PHI:2290	BcBOA6	Botrytis cinerea	reduced virulence	0	0	20	18	19	No	57
386	PHI:3364	MMAR 1663	Mycobacterium marinum	reduced virulence	2	2	3	1	0	No	8
387	PHI:3820	SecA2	Mycobacterium marinum	reduced virulence	2	2	2	3	0	No	9
388	PHI:8042	LpxA	Acinetobacter baumannii	reduced virulence	1	1	0	2	2	No	6
389	PHI:9985	ArgH (PXO 00346)	Xanthomonas oryzae	reduced virulence	1	1	1	1	1	No	5
390	PHI:1139	RaxQ	Xanthomonas oryzae	increased virulence (hypervirulence)	6	5	8	8	6	No	33
391	PHI:9984	TrpC (PXO 04004)	Xanthomonas oryzae	reduced virulence	1	1	1	1	1	No	5
392	PHI:3894	Prc	Xanthomonas oryzae	reduced virulence	0	0	0	1	0	No	1
393	PHI:9988	IlvC (PXO 02605)	Xanthomonas oryzae	reduced virulence	1	1	1	1	1	No	5
394	PHI:9980	LeuD (PXO 02612)	Xanthomonas oryzae	reduced virulence	1	1	1	1	1	No	5
395	PHI:9981	LeuC (PXO 02613)	Xanthomonas oryzae	reduced virulence	0	1	0	1	2	No	4
396	PHI:1141	RaxB	Xanthomonas oryzae	increased virulence (hypervirulence)	6	6	6	7	1	No	26
397	PHI:2802	3hnr	Exserohilum turcicum	unaffected pathogenicity	3	3	2	2	2	No	12
398	PHI:11260	Tgif2k-b	Toxoplasma gondii	increased virulence (hypervirulence)	0	0	1	3	3	No	7
399	PHI:7075	PdxS	Actinobacillus pleuropneumoniae	reduced virulence	1	1	1	1	1	No	5
400	PHI:7076	PdxT	Actinobacillus pleuropneumoniae	reduced virulence	1	1	1	1	1	No	5
401	PHI:1041	Lmpma1	Leptosphaeria maculans	loss of pathogenicity	1	1	1	1	1	No	5
402	PHI:3172;PHI:9580	PaaE	Burkholderia cenocepacia	reduced virulence	2	2	2	2	1	No	9
403	PHI:8826	Bcal1635	Burkholderia cenocepacia	increased virulence (hypervirulence)	1	2	2	1	0	No	6
404	PHI:4921	FlmQ	Burkholderia cenocepacia	reduced virulence	1	1	1	2	1	No	6
405	PHI:8617	AfcE (BCAS0208)	Burkholderia cenocepacia	reduced virulence	0	1	0	2	1	No	4
406	PHI:8862	LeuB	Salmonella enterica	reduced virulence	3	2	2	2	2	No	11
407	PHI:8863	ArgD	Salmonella enterica	reduced virulence	6	7	8	7	7	No	35
408	PHI:6332;PHI:7610	Rs-cps Cathepsin S (Rs-cps)	Radopholus similis	reduced virulence	6	8	10	8	7	No	39
409	PHI:5109	Prt	Salmonella enterica	reduced virulence	1	1	1	1	1	No	5
410	PHI:2158	MoCMK1	Magnaporthe oryzae	reduced virulence	4	4	4	5	2	No	19
411	PHI:3325	PGM	Streptococcus parauberis	reduced virulence	1	0	1	1	1	No	4
412	PHI:8962	LeuA	Klebsiella pneumoniae	reduced virulence	2	1	1	1	1	No	6
413	PHI:4057	PsMPK1	Phytophthora sojae	reduced virulence	1	1	2	1	0	No	5
414	PHI:2182	MoAtg4	Magnaporthe oryzae	loss of pathogenicity	1	1	1	1	1	No	5
415	PHI:2484	Ste11	Botrytis cinerea	loss of pathogenicity	2	4	3	2	2	No	13
416	PHI:11099	EscN	Escherichia coli	reduced virulence	1	3	1	2	2	No	9
417	PHI:5275	CopA	Vibrio tasmaniensis	reduced virulence	1	3	4	6	4	No	18
418	PHI:6358	HtrA	Glaesserella parasuis	reduced virulence	1	1	1	2	1	No	6
419	PHI:10321	Aflset1	Aspergillus flavus	reduced virulence	4	4	4	5	5	No	22
420	PHI:9913	AflBck1	Aspergillus flavus	reduced virulence	0	0	0	1	0	No	1
421	PHI:9901	A<U+FB02>ste20 (AFLA 035530)	Aspergillus flavus	reduced virulence	1	2	1	3	4	No	11
422	PHI:6952	AflRmtA	Aspergillus flavus	unaffected pathogenicity reduced virulence	2	3	3	4	4	No	16
423	PHI:9939	DnjA (AFLA 050040 )	Aspergillus flavus	reduced virulence	1	0	2	2	0	No	5
424	PHI:6683	AflgcnE	Aspergillus flavus	reduced virulence	7	7	6	6	6	No	32
425	PHI:2155	MoPEX7	Magnaporthe oryzae	loss of pathogenicity	6	4	3	2	4	No	19
426	PHI:1133	Lmepi	Leptosphaeria maculans	loss of pathogenicity	1	1	1	1	3	No	7
427	PHI:4077	EntA	Bacillus cereus	reduced virulence	2	3	4	4	4	No	17
428	PHI:2895	F-avi4330	Agrobacterium vitis	loss of pathogenicity	1	2	1	2	2	No	8
429	PHI:2370	Bcpka1	Botrytis cinerea	reduced virulence	5	4	4	4	2	No	19
430	PHI:2835	RED2	Bipolaris maydis	reduced virulence	0	1	1	1	2	No	5
431	PHI:2834	LAM1	Bipolaris maydis	reduced virulence	0	0	0	1	0	No	1
432	PHI:2640	CNB1	Clavispora lusitaniae	reduced virulence	3	4	3	5	4	No	19
433	PHI:3370	Vph1	Candida albicans	reduced virulence	1	1	1	1	1	No	5
434	PHI:4903	Fdh3	Candida albicans	unaffected pathogenicity reduced virulence	2	3	2	1	1	No	9
435	PHI:4904	Glr1	Candida albicans	reduced virulence	4	5	4	4	2	No	19
436	PHI:4250	AroB	Burkholderia glumae	reduced virulence	1	1	1	1	1	No	5
437	PHI:4249	AroA	Burkholderia glumae	reduced virulence	0	1	1	1	1	No	4
438	PHI:8850	PrtA (bglu 1g16590)	Burkholderia glumae	reduced virulence	1	2	2	2	2	No	9
439	PHI:2961	GcvP	Edwardsiella ictaluri	reduced virulence	1	1	1	1	1	No	5
440	PHI:2960	FrdA	Edwardsiella ictaluri	reduced virulence	2	2	2	2	2	No	10
441	PHI:2962	GlyA	Edwardsiella ictaluri	reduced virulence	2	2	3	3	3	No	13
442	PHI:2959	Mdh	Edwardsiella ictaluri	reduced virulence	4	4	3	4	4	No	19
443	PHI:7811	CaTpk2 (CTRG 01736)	Candida tropicalis	loss of pathogenicity unaffected pathogenicity	3	2	5	3	0	No	13
444	PHI:7810	CaTpk1 (CTRG 03315)	Candida tropicalis	loss of pathogenicity unaffected pathogenicity	2	4	3	4	0	No	13
445	PHI:1072;PHI:2124	STE7 MGSTE7p	Zymoseptoria tritici	loss of pathogenicity	2	3	1	1	0	No	7
446	PHI:479	MEP1	Coccidioides posadasii	reduced virulence	1	1	1	1	1	No	5
447	PHI:10595	ClpB	Pectobacterium carotovorum	unaffected pathogenicity	3	4	5	3	3	No	18
448	PHI:10573	RsmA	Pectobacterium carotovorum	unaffected pathogenicity	1	1	2	2	2	No	8
449	PHI:1073;PHI:2123	STE11 MGSTE11p	Zymoseptoria tritici	loss of pathogenicity	3	2	2	2	1	No	10
450	PHI:1076;PHI:2127	STE20 MGSTE20p	Zymoseptoria tritici	unaffected pathogenicity	1	2	3	3	4	No	13
451	PHI:2397	ChSte11	Bipolaris maydis	loss of pathogenicity	0	0	1	3	1	No	5
452	PHI:4583	FkpA	Cronobacter turicensis	reduced virulence	3	4	4	4	4	No	19
453	PHI:2202;PHI:7327	PdeH MopdeH	Magnaporthe oryzae	reduced virulence loss of pathogenicity	1	1	1	1	1	No	5
454	PHI:2735	RsmA	Pectobacterium wasabiae	increased virulence (hypervirulence)	1	1	2	2	2	No	8
455	PHI:4613	EsaN	Edwardsiella tarda	increased virulence (hypervirulence)	1	1	1	1	1	No	5
456	PHI:4694	BcsA	Salmonella enterica	increased virulence (hypervirulence)	2	2	2	2	2	No	10
457	PHI:2656	PmrF	Salmonella enterica	reduced virulence	2	2	1	1	1	No	7
458	PHI:2582;PHI:2603	Rim20	Ustilago maydis	unaffected pathogenicity	1	1	1	1	1	No	5
459	PHI:5303	AaGPx3	Alternaria alternata	reduced virulence	0	1	2	2	1	No	6
460	PHI:2837	OXI1	Bipolaris maydis	reduced virulence	1	1	1	2	0	No	5
461	PHI:8690	DegP (ROD 01651)	Citrobacter rodentium	loss of pathogenicity unaffected pathogenicity	2	2	2	2	2	No	10
462	PHI:9334	Map	Citrobacter rodentium	effector (plant avirulence determinant)	3	2	2	3	2	No	12
463	PHI:10536	ArtP	Citrobacter rodentium	reduced virulence	9	1	5	8	5	No	28
464	PHI:3526	LacA	Salmonella enterica	reduced virulence	4	4	4	2	3	No	17
465	PHI:6516	EutD	Mycoplasma agalactiae	reduced virulence	1	1	1	1	1	No	5
466	PHI:3907	ZrfC	Aspergillus fumigatus	reduced virulence loss of pathogenicity	2	2	2	3	2	No	11
467	PHI:6569	SUB6	Trichophyton mentagrophytes	reduced virulence	3	3	3	6	4	No	19
468	PHI:9309	PfkA	Erwinia amylovora	reduced virulence	3	3	3	2	2	No	13
469	PHI:9314	MetB	Erwinia amylovora	reduced virulence	1	1	1	1	1	No	5
470	PHI:9325	MetF	Erwinia amylovora	unaffected pathogenicity	1	0	1	1	1	No	4
471	PHI:9322	Ppc	Erwinia amylovora	unaffected pathogenicity	1	1	1	1	1	No	5
472	PHI:9316	ArgG	Erwinia amylovora	reduced virulence	1	1	1	2	1	No	6
473	PHI:9318	IlvA	Erwinia amylovora	reduced virulence	3	3	3	3	4	No	16
474	PHI:9315	MetE	Erwinia amylovora	reduced virulence	2	1	0	1	1	No	5
475	PHI:9323	CysI3	Erwinia amylovora	unaffected pathogenicity	1	1	1	1	1	No	5
476	PHI:9317	PurF	Erwinia amylovora	reduced virulence	1	1	1	1	3	No	7
477	PHI:7160	Lon	Erwinia amylovora	increased virulence (hypervirulence) loss of pathogenicity	4	2	2	4	4	No	16
478	PHI:9320	PurL	Erwinia amylovora	reduced virulence	1	1	1	1	1	No	5
479	PHI:9327	AsnB	Erwinia amylovora	unaffected pathogenicity	3	3	2	1	1	No	10
480	PHI:9319	LeuB	Erwinia amylovora	reduced virulence	3	2	2	2	2	No	11
481	PHI:9328	CarA	Erwinia amylovora	reduced virulence	2	2	2	2	2	No	10
482	PHI:9307	PyrC	Erwinia amylovora	reduced virulence	1	1	1	1	2	No	6
483	PHI:7094;PHI:7438	ClpV-2 EAMY 3222	Erwinia amylovora	reduced virulence unaffected pathogenicity increased virulence (hypervirulence)	2	3	2	2	2	No	11
484	PHI:7253	KatA	Erwinia amylovora	reduced virulence	0	1	1	1	1	No	4
485	PHI:9310	Pgi	Erwinia amylovora	reduced virulence	2	2	1	3	2	No	10
486	PHI:3126;PHI:9305	ArgD	Erwinia amylovora	loss of pathogenicity reduced virulence unaffected pathogenicity	6	7	8	7	7	No	35
487	PHI:9321	TrpB	Erwinia amylovora	reduced virulence	1	1	1	1	1	No	5
488	PHI:10919	EaAdeP (EAMY 3685)	Erwinia amylovora	reduced virulence	2	1	3	2	3	No	11
489	PHI:9308	GlmS	Erwinia amylovora	reduced virulence	2	2	2	2	4	No	12
490	PHI:2227	Pao	Ustilago maydis	reduced virulence loss of pathogenicity	4	2	2	3	2	No	13
491	PHI:4071	IMPDH	Streptococcus suis	reduced virulence	1	1	1	1	1	No	5
492	PHI:7689	GGT	Helicobacter pylori	reduced virulence	1	1	1	1	0	No	4
493	PHI:8580	PurL (Dda3937 03379)	Dickeya dadantii	reduced virulence	1	1	1	1	1	No	5
494	PHI:8574	CysJ (Dda3937 00209)	Dickeya dadantii	reduced virulence	4	4	6	4	7	No	25
495	PHI:8581	LysA (Dda3937 02577)	Dickeya dadantii	reduced virulence	1	1	2	1	3	No	8
496	PHI:8578	LeuA (Dda3937 04301)	Dickeya dadantii	reduced virulence	3	2	2	1	1	No	9
497	PHI:8570	MetB (Dda3937 03888)	Dickeya dadantii	reduced virulence	2	1	2	2	2	No	9
498	PHI:8577	CarA (Dda3937 01390)	Dickeya dadantii	reduced virulence	2	2	2	2	1	No	9
499	PHI:8575	DegQ (Dda3937 00697)	Dickeya dadantii	reduced virulence	1	0	1	1	1	No	4
500	PHI:8573	PurF (Dda3937 02099)	Dickeya dadantii	reduced virulence	1	1	1	1	3	No	7
501	PHI:8576	PyrE (Dda3937 03258)	Dickeya dadantii	reduced virulence	1	1	1	1	1	No	5
502	PHI:8569	ClpA (Dda3937 02363)	Dickeya dadantii	reduced virulence	0	0	3	1	0	No	4
503	PHI:8579	GuaB (Dda3937 00004)	Dickeya dadantii	reduced virulence	1	1	1	1	1	No	5
504	PHI:2357	CYP52X1	Beauveria bassiana	reduced virulence	3	2	4	2	1	No	12
505	PHI:2474	Imd1	Cryptococcus neoformans	reduced virulence	1	1	2	1	2	No	7
506	PHI:10750	CLU5b (GLRG 04687)	Colletotrichum graminicola	unaffected pathogenicity	1	1	1	2	2	No	7
507	PHI:6227	KRE5	Colletotrichum graminicola	reduced virulence	2	2	1	1	2	No	8
508	PHI:6826	GAA1	Colletotrichum graminicola	loss of pathogenicity	0	0	0	1	0	No	1
509	PHI:9116	GLS1	Colletotrichum graminicola	reduced virulence	2	2	2	1	0	No	7
510	PHI:6827	GPI8	Colletotrichum graminicola	loss of pathogenicity	2	2	2	1	2	No	9
511	PHI:2490	MCA	Leishmania mexicana	increased virulence (hypervirulence) reduced virulence	1	1	1	1	1	No	5
512	PHI:8769	MaPpt1	Metarhizium acridum	unaffected pathogenicity	12	13	12	14	10	No	61
513	PHI:3263	MaSnf1	Metarhizium acridum	reduced virulence	10	8	12	10	10	No	50
514	PHI:7756	Mrpct (MAA 00035)	Metarhizium robertsii	reduced virulence	3	3	2	2	3	No	13
515	PHI:3328	MrKu70	Metarhizium robertsii	unaffected pathogenicity	1	0	1	1	1	No	4
516	PHI:10684	MrHex1 (MAA 00782)	Metarhizium robertsii	reduced virulence	1	1	1	1	1	No	5
517	PHI:5428	Mero-Slt2	Metarhizium robertsii	loss of pathogenicity	0	0	0	1	1	No	2
518	PHI:9193	MrArk1 (MAA 03415)	Beauveria bassiana	reduced virulence	2	4	3	2	2	No	13
519	PHI:7251	Mrtdc	Metarhizium robertsii	reduced virulence	5	4	5	3	3	No	20
520	PHI:5433	Mero-Ste11	Metarhizium robertsii	unaffected pathogenicity	3	3	3	6	7	No	22
521	PHI:10530	MrMao-1 (MAA 03753)	Metarhizium robertsii	increased virulence (hypervirulence)	2	2	2	1	1	No	8
522	PHI:9531	MepC (MAA 04182)	Metarhizium robertsii	unaffected pathogenicity	1	3	1	1	1	No	7
523	PHI:5435	Mero-Ssk2	Metarhizium robertsii	reduced virulence	6	7	8	6	1	No	28
524	PHI:5430	Mero-Ste7	Metarhizium robertsii	reduced virulence	2	0	1	1	2	No	6
525	PHI:5434	Mero-Bck1	Metarhizium robertsii	reduced virulence	3	4	5	5	2	No	19
526	PHI:9532	Mep2 (MAA 05002)	Metarhizium robertsii	unaffected pathogenicity	1	3	1	1	1	No	7
527	PHI:10947	GLYK (MAA 05119)	Metarhizium acridum	increased virulence (hypervirulence)	1	1	1	1	1	No	5
528	PHI:9534	Pr1A (MAA 05675)	Metarhizium robertsii	unaffected pathogenicity reduced virulence	5	5	6	6	4	No	26
529	PHI:5432	Mero-Mkk1/2	Metarhizium robertsii	reduced virulence	1	1	2	3	0	No	7
530	PHI:6380	MrLPAAT1	Metarhizium robertsii	reduced virulence	2	2	2	2	3	No	11
531	PHI:3069	MrAC	Metarhizium robertsii	reduced virulence	15	6	14	10	1	No	46
532	PHI:8043	GntR	Streptococcus suis	increased virulence (hypervirulence)	2	1	1	2	0	No	6
533	PHI:2535	ERG11B	Aspergillus fumigatus	lethal unaffected pathogenicity loss of pathogenicity	1	2	1	2	2	No	8
534	PHI:2513	GFA1	Aspergillus fumigatus	lethal loss of pathogenicity	1	1	2	2	3	No	9
535	PHI:5267	UgeB	Aspergillus nidulans	increased virulence (hypervirulence)	2	2	2	2	1	No	9
536	PHI:4230;PHI:8901	AbcB AbcG1	Aspergillus fumigatus	reduced virulence unaffected pathogenicity	16	12	9	4	11	No	52
537	PHI:2693	GcABC-G1	Grosmannia clavigera	reduced virulence	7	12	6	10	12	No	47
538	PHI:10468	HacA (TERG 05396)	Trichophyton rubrum	reduced virulence	0	0	0	1	0	No	1
539	PHI:493	STE11	Candida glabrata	reduced virulence	2	1	2	1	1	No	7
540	PHI:6206	BbCypC	Beauveria bassiana	unaffected pathogenicity	7	7	7	7	7	No	35
541	PHI:424	PCK1	Cryptococcus neoformans	reduced virulence	2	2	2	2	1	No	9
542	PHI:2266	Ptr2	Parastagonospora nodorum	unaffected pathogenicity	2	2	1	4	3	No	12
543	PHI:2840	CnSEC14-1	Cryptococcus neoformans	reduced virulence	0	1	0	2	2	No	5
544	PHI:2841	CnSEC14-2	Cryptococcus neoformans	unaffected pathogenicity	0	2	0	2	2	No	6
545	PHI:2179	Moplaa	Magnaporthe oryzae	reduced virulence	2	2	2	1	1	No	8
546	PHI:6157	Bcdh	Botrytis cinerea	unaffected pathogenicity	4	5	4	6	6	No	25
547	PHI:6156	Bcer	Botrytis cinerea	reduced virulence unaffected pathogenicity	1	1	1	1	1	No	5
548	PHI:9485	Foatg3	Fusarium oxysporum	reduced virulence unaffected pathogenicity	1	1	1	1	1	No	5
549	PHI:4966	Sdi1	Zymoseptoria tritici	unaffected pathogenicity	2	2	2	2	2	No	10
550	PHI:6548	Zt89160	Zymoseptoria tritici	increased virulence (hypervirulence)	1	0	2	3	1	No	7
551	PHI:4914	ZtCBR1	Zymoseptoria tritici	reduced virulence	2	2	2	2	2	No	10
552	PHI:4943;PHI:10788	KU70 ZtKu70	Zymoseptoria tritici	unaffected pathogenicity	2	0	2	1	2	No	7
553	PHI:4944	KU80	Zymoseptoria tritici	unaffected pathogenicity	1	0	1	1	1	No	4
554	PHI:8596	ZtPks7	Zymoseptoria tritici	unaffected pathogenicity	0	0	0	1	0	No	1
555	PHI:10787	ZtSof1 (Mycgr3G74194)	Zymoseptoria tritici	unaffected pathogenicity	1	1	1	2	0	No	5
556	PHI:7446	Myco4	Zymoseptoria tritici	reduced virulence	1	1	1	2	1	No	6
557	PHI:2441	MgAlg2	Zymoseptoria tritici	loss of pathogenicity	2	2	1	1	1	No	7
558	PHI:8592	ZtPpt	Zymoseptoria tritici	loss of pathogenicity	2	2	2	2	1	No	9
559	PHI:2401	CaRING1	Xanthomonas campestris Pseudomonas syringae Hyaloperonospora arabidopsidis	increased virulence (hypervirulence) reduced virulence	5	6	6	3	4	No	24
560	PHI:210	CAP1	Candida albicans	loss of pathogenicity	1	1	1	1	1	No	5
561	PHI:242	CaTPS2	Candida albicans	reduced virulence	2	2	0	2	0	No	6
562	PHI:10441	Aoglo3 ((AOL s00054g68))	Orbilia oligospora	reduced virulence	3	3	5	3	4	No	18
563	PHI:8036	AoRab-2 (AOL s00054g360)	Orbilia oligospora	unaffected pathogenicity	6	6	6	7	6	No	31
564	PHI:8035	AoRab-7A (AOL s00054g446)	Orbilia oligospora	reduced virulence	7	7	7	6	8	No	35
565	PHI:11148	Aolatg4	Orbilia oligospora	reduced virulence	1	1	1	1	1	No	5
566	PHI:4021	AoMls	Orbilia oligospora	reduced virulence	2	2	2	2	2	No	10
567	PHI:5276	AOL s00215g283	Orbilia oligospora	increased virulence (hypervirulence)	0	0	0	15	0	No	15
568	PHI:7874	VdSso1	Verticillium dahliae	reduced virulence	1	1	2	1	1	No	6
569	PHI:11128	Hex1 (VDAG 01749)	Verticillium dahliae	reduced virulence	1	1	1	1	1	No	5
570	PHI:9793	VdOCH1	Verticillium dahliae	reduced virulence	3	2	3	1	1	No	10
571	PHI:10803	Mep1	Verticillium dahliae	unaffected pathogenicity reduced virulence	1	3	1	1	1	No	7
572	PHI:7329	STT3	Verticillium dahliae	reduced virulence	1	1	2	1	1	No	6
573	PHI:10410	VdTHI20	Verticillium dahliae	reduced virulence	2	2	2	1	2	No	9
574	PHI:6147	VdNRS/ER	Verticillium dahliae	loss of pathogenicity	1	1	1	1	1	No	5
575	PHI:5387	VdCYC8	Verticillium dahliae	reduced virulence	5	5	4	7	3	No	24
576	PHI:8052	Vdmyo5	Verticillium dahliae	reduced virulence	4	5	4	4	8	No	25
577	PHI:7873	VdSec22	Verticillium dahliae	reduced virulence	1	1	1	1	0	No	4
578	PHI:6640	VdNoxB	Verticillium dahliae	loss of pathogenicity	0	0	0	1	0	No	1
579	PHI:7173	HiC-15	Verticillium dahliae	reduced virulence	0	2	1	1	0	No	4
580	PHI:9378	VdOGDH (VDAG 10018)	Verticillium dahliae	reduced virulence	1	2	1	1	1	No	6
581	PHI:8670	ACC deaminase (VDAG 10392)	Verticillium dahliae	reduced virulence increased virulence (hypervirulence)	1	1	1	2	1	No	6
582	PHI:7878	BcAtg7	Botrytis cinerea	reduced virulence	1	1	1	1	2	No	6
583	PHI:6949	BcCLA4	Botrytis cinerea	loss of pathogenicity	2	2	1	1	2	No	8
584	PHI:7722	BcDGAT2	Botrytis cinerea	reduced virulence	1	2	2	2	2	No	9
585	PHI:4715	Crc	Pseudomonas aeruginosa	reduced virulence	1	0	1	2	1	No	5
586	PHI:11144	MGG 02524 (MoVps29)	Magnaporthe oryzae	reduced virulence	1	1	1	1	1	No	5
587	PHI:7991	PoVps9 (MGG 05379) PoVps9	Magnaporthe oryzae	reduced virulence loss of pathogenicity	1	0	1	1	1	No	4
588	PHI:6739	MoGls2	Magnaporthe oryzae	reduced virulence	3	2	3	2	3	No	13
589	PHI:804	MGG 08628	Magnaporthe oryzae	reduced virulence	2	1	1	1	1	No	6
590	PHI:4688	MET6	Magnaporthe oryzae	loss of pathogenicity	2	1	0	1	1	No	5
591	PHI:2140	MoVam7	Magnaporthe oryzae	loss of pathogenicity	1	1	1	1	0	No	4
592	PHI:8040;PHI:8047	Mouba2 Uba2	Magnaporthe oryzae	reduced virulence	7	8	10	9	8	No	42
593	PHI:3975	MoIlv2	Magnaporthe oryzae	loss of pathogenicity	3	2	4	2	2	No	13
594	PHI:2096	Calcium-transporting ATPase 3	Magnaporthe oryzae	loss of pathogenicity	0	0	0	1	3	No	4
595	PHI:9951	MoFap7 (MGG 16212)	Magnaporthe oryzae	reduced virulence	1	1	1	1	1	No	5
596	PHI:7019	MoMyo5	Magnaporthe oryzae	loss of pathogenicity	5	4	4	3	5	No	21
597	PHI:3174	MoSip2	Magnaporthe oryzae	loss of pathogenicity	2	2	2	2	1	No	9
598	PHI:2109	CNB	Magnaporthe oryzae	reduced virulence loss of pathogenicity	5	5	4	4	5	No	23
599	PHI:9200	MoCKb2 (MGG 05651)	Magnaporthe oryzae	reduced virulence unaffected pathogenicity	1	1	1	1	1	No	5
600	PHI:6638	Modnm2	Magnaporthe oryzae	unaffected pathogenicity	2	2	1	2	2	No	9
601	PHI:890	MGG 07015	Magnaporthe oryzae	reduced virulence	0	0	0	1	1	No	2
602	PHI:2009	HOS4	Magnaporthe oryzae	unaffected pathogenicity	2	2	1	4	4	No	13
603	PHI:8038;PHI:8045	Mosmt3 Smt3	Magnaporthe oryzae	reduced virulence	1	1	1	1	1	No	5
604	PHI:11057	MoRMT2 (MGG 09290)	Magnaporthe oryzae	reduced virulence	1	1	1	1	1	No	5
605	PHI:4491	SHM	Magnaporthe oryzae	reduced virulence	2	2	3	3	3	No	13
606	PHI:8879	MoBUB2 (XP 003710862)	Magnaporthe oryzae	reduced virulence	1	1	1	1	0	No	4
607	PHI:7112	MoERR1	Magnaporthe oryzae	reduced virulence	2	2	2	2	2	No	10
608	PHI:2190	MoCYP51A	Magnaporthe oryzae	reduced virulence	2	2	2	1	0	No	7
609	PHI:801;PHI:8650	MGG 04621 Poyth1 (MGG 04621)	Magnaporthe oryzae	reduced virulence	0	0	0	1	0	No	1
610	PHI:2006;PHI:2008	HST1	Magnaporthe oryzae	unaffected pathogenicity	2	3	4	3	3	No	15
611	PHI:811	MGG 10510	Magnaporthe oryzae	reduced virulence	2	1	1	1	0	No	5
612	PHI:881	MGG 04556	Magnaporthe oryzae	reduced virulence	2	4	5	3	2	No	16
613	PHI:2985	MGG 04521.6	Magnaporthe oryzae	reduced virulence	2	1	1	3	2	No	9
614	PHI:8754	MoPer1 (MGG 04527)	Magnaporthe oryzae	reduced virulence	1	1	2	1	2	No	7
615	PHI:7149	Moglo3	Magnaporthe oryzae	reduced virulence	3	3	3	3	4	No	16
616	PHI:11055	MoHMT1 (MGG 04584)	Magnaporthe oryzae	reduced virulence	4	4	3	5	4	No	20
617	PHI:10770	MoSAS3 (MGG 04615)	Magnaporthe oryzae	loss of pathogenicity	1	2	2	3	2	No	10
618	PHI:772;PHI:797	MGG 01481	Magnaporthe oryzae	loss of pathogenicity reduced virulence	5	5	3	2	4	No	19
619	PHI:8648	Poime4 (MGG 01492)	Magnaporthe oryzae	reduced virulence	2	2	2	2	1	No	9
620	PHI:5480	MoPyr5	Magnaporthe oryzae	reduced virulence	1	1	0	1	1	No	4
621	PHI:2205	JmjC domain-containing protein 5 [GH10 family]	Magnaporthe oryzae	reduced virulence	3	2	2	2	1	No	10
622	PHI:8734;PHI:9355	MoLeu1 (MGG 01553) Leu1 (MGG 01553)	Magnaporthe oryzae	loss of pathogenicity reduced virulence	2	1	2	1	1	No	7
623	PHI:6455	MoYcp4	Magnaporthe oryzae	reduced virulence	3	2	3	2	4	No	14
624	PHI:5232	MoARG1	Magnaporthe oryzae	loss of pathogenicity	1	1	1	1	1	No	5
625	PHI:9551	Moarl8	Magnaporthe oryzae	unaffected pathogenicity	1	2	1	1	1	No	6
626	PHI:2114	Calnexin	Magnaporthe oryzae	loss of pathogenicity	1	1	1	1	1	No	5
627	PHI:3257	MoIlv1	Magnaporthe oryzae	reduced virulence	3	3	3	3	3	No	15
628	PHI:6615	Mocapn4	Magnaporthe oryzae	reduced virulence	1	1	1	1	2	No	6
629	PHI:11143	MGG 04830 (MoVps26)	Magnaporthe oryzae	reduced virulence	1	1	1	1	1	No	5
630	PHI:2143	MoVPR	Magnaporthe oryzae	reduced virulence	0	0	0	1	1	No	2
631	PHI:8039;PHI:8046	Moaos1 Aos1	Magnaporthe oryzae	reduced virulence	4	4	4	4	4	No	20
632	PHI:790	MGG 07259	Magnaporthe oryzae	reduced virulence	2	2	2	2	0	No	8
633	PHI:2940	MoARK1	Magnaporthe oryzae	reduced virulence	2	5	3	2	2	No	14
634	PHI:3823	MET13	Magnaporthe oryzae	loss of pathogenicity	1	0	1	1	1	No	4
635	PHI:5082	MoAcat1	Magnaporthe oryzae	reduced virulence	2	2	2	2	2	No	10
636	PHI:2062;PHI:3815	Gph1 GPH1	Magnaporthe oryzae	unaffected pathogenicity loss of pathogenicity reduced virulence	3	2	2	2	3	No	12
637	PHI:7134	MoRab5B	Magnaporthe oryzae	reduced virulence	8	8	8	6	8	No	38
638	PHI:2113	Kin4	Magnaporthe oryzae	reduced virulence loss of pathogenicity	0	0	2	1	2	No	5
639	PHI:2145;PHI:9180	MoSSADH MoSSADH (MGG 01230)	Magnaporthe oryzae	loss of pathogenicity unaffected pathogenicity	6	9	8	6	5	No	34
640	PHI:8611	Pyruvate kinase	Magnaporthe oryzae	unaffected pathogenicity reduced virulence loss of pathogenicity	3	5	5	5	5	No	23
641	PHI:7734	CYP1	Magnaporthe oryzae	reduced virulence	5	5	1	3	2	No	16
642	PHI:3179	MoKIN1	Magnaporthe oryzae	reduced virulence	1	2	1	2	1	No	7
643	PHI:6674	MoTRX2	Magnaporthe oryzae	reduced virulence	2	2	3	2	2	No	11
644	PHI:9290	RAM1 (MGG 01287T0)	Magnaporthe oryzae	reduced virulence	3	3	2	3	4	No	15
645	PHI:4736;PHI:11140	MoYpt7 MGG 08144 (MoYpt7)	Magnaporthe oryzae	loss of pathogenicity reduced virulence unaffected pathogenicity	4	6	5	5	3	No	23
646	PHI:3824	MET12	Magnaporthe oryzae	unaffected pathogenicity loss of pathogenicity	1	0	1	1	1	No	4
647	PHI:11243	Mobre2 (MGG 01427)	Magnaporthe oryzae	reduced virulence	1	1	1	1	0	No	4
648	PHI:2034	MFP1	Magnaporthe oryzae	reduced virulence	2	2	8	6	6	No	24
649	PHI:5395	MoSec62	Magnaporthe oryzae	reduced virulence	1	1	1	1	0	No	4
650	PHI:2169	MGG 06188.6	Magnaporthe oryzae	reduced virulence	1	1	1	1	1	No	5
651	PHI:2153;PHI:2356	MoHyr1 MoHYR1	Magnaporthe oryzae	reduced virulence	0	1	2	2	2	No	7
652	PHI:3809	TRA1	Magnaporthe oryzae	reduced virulence	6	7	5	6	5	No	29
653	PHI:6637	Movps1	Magnaporthe oryzae	lethal	5	5	3	5	4	No	22
654	PHI:5191	TPX1	Magnaporthe oryzae	reduced virulence	1	1	1	1	1	No	5
655	PHI:5440	ABA4	Magnaporthe oryzae	reduced virulence	3	2	3	3	3	No	14
656	PHI:6158	CKS1	Magnaporthe oryzae	reduced virulence	1	1	1	1	1	No	5
657	PHI:7021	MoJMJ1	Magnaporthe oryzae	reduced virulence	7	7	6	6	4	No	30
658	PHI:2099	Pmc1	Magnaporthe oryzae	reduced virulence loss of pathogenicity	3	4	6	2	3	No	18
659	PHI:9952	Ubp4 (MGG 04957)	Magnaporthe oryzae	loss of pathogenicity	6	9	5	6	5	No	31
660	PHI:9548	Moarl1	Magnaporthe oryzae	reduced virulence	7	7	7	6	6	No	33
661	PHI:5306	MoSKP1	Magnaporthe oryzae	loss of pathogenicity	1	1	1	1	1	No	5
662	PHI:882	MGG 04985	Magnaporthe oryzae	reduced virulence	2	2	2	4	1	No	11
663	PHI:2107	MGG 05905.5	Magnaporthe oryzae	unaffected pathogenicity reduced virulence	1	1	1	2	2	No	7
664	PHI:2030	TGL3-1	Magnaporthe oryzae	unaffected pathogenicity	3	3	3	4	3	No	16
665	PHI:11141	MGG 05089 (MoVps35)	Magnaporthe oryzae	reduced virulence	2	2	2	2	1	No	9
666	PHI:4616	MoSFA1	Magnaporthe oryzae	reduced virulence	4	4	4	2	1	No	15
667	PHI:7273	Pmp1	Magnaporthe oryzae	reduced virulence unaffected pathogenicity	0	0	0	1	0	No	1
668	PHI:5047;PHI:6635	MoFis1	Magnaporthe oryzae	reduced virulence	1	0	1	1	1	No	4
669	PHI:2060	MgLig4	Magnaporthe oryzae	unaffected pathogenicity	3	3	3	2	3	No	14
670	PHI:5441	ABA GPCR	Magnaporthe oryzae	unaffected pathogenicity	1	1	1	1	0	No	4
671	PHI:2186	PIC5	Magnaporthe oryzae	reduced virulence	2	2	1	2	1	No	8
672	PHI:5366	MoSyn8	Magnaporthe oryzae	reduced virulence	0	0	0	1	2	No	3
673	PHI:8695	MoImd4 (MGG 03699)	Magnaporthe oryzae	reduced virulence	2	1	3	1	1	No	8
674	PHI:9201	MoCKa1 (MGG 03696)	Magnaporthe oryzae	unaffected pathogenicity	1	2	1	1	1	No	6
675	PHI:2074	Moatg6	Magnaporthe oryzae	loss of pathogenicity	1	1	1	1	1	No	5
676	PHI:7113	MoERR2	Magnaporthe oryzae	unaffected pathogenicity	1	1	2	1	2	No	7
677	PHI:8610;PHI:10771	Gcn5 (MGG 03677) MoGCN5 (MGG 03677)	Magnaporthe oryzae	reduced virulence unaffected pathogenicity	5	4	5	6	8	No	28
678	PHI:9356	Leu4 (MGG 13485)	Magnaporthe oryzae	reduced virulence	0	0	0	1	1	No	2
679	PHI:4024	MoST1	Magnaporthe oryzae	unaffected pathogenicity	5	7	6	13	11	No	42
680	PHI:5083	MoAcat2	Magnaporthe oryzae	reduced virulence	1	1	1	1	1	No	5
681	PHI:2112;PHI:3177	Tos3 MoTos3	Magnaporthe oryzae	unaffected pathogenicity reduced virulence	2	2	3	2	2	No	11
682	PHI:11245	Moswd2 (MGG 06406)	Magnaporthe oryzae	reduced virulence	1	1	1	2	2	No	7
683	PHI:5041	MoYAK1	Magnaporthe oryzae	reduced virulence	4	5	6	5	9	No	29
684	PHI:9032	Mocrn1 (MGG 06389)	Magnaporthe oryzae	reduced virulence unaffected pathogenicity	9	8	6	8	7	No	38
685	PHI:11241	MoMca2 (MGG 13530)	Magnaporthe oryzae	reduced virulence	1	1	1	1	2	No	6
686	PHI:10411	UBP8 (MGG-03527)	Magnaporthe oryzae	reduced virulence	6	8	6	7	7	No	34
687	PHI:2162;PHI:7725	CPKA CpkA	Magnaporthe oryzae	reduced virulence unaffected pathogenicity	2	1	3	3	0	No	9
688	PHI:6634;PHI:9301	MoDnm1 Modnm1 (MGG 06361)	Magnaporthe oryzae	reduced virulence	4	4	4	3	4	No	19
689	PHI:10426	PoMet14 (MGG 06348)	Magnaporthe oryzae	reduced virulence	1	0	1	1	1	No	4
690	PHI:418;PHI:2119;PHI:8262	MST11 MST11p Mst11	Magnaporthe oryzae	loss of pathogenicity reduced virulence unaffected pathogenicity	6	8	6	7	4	No	31
691	PHI:2406	MoSKN7	Magnaporthe oryzae	unaffected pathogenicity	1	1	1	1	1	No	5
692	PHI:9553	Moarf1	Magnaporthe oryzae	unaffected pathogenicity	1	1	1	1	1	No	5
693	PHI:7133	MoRab5A	Magnaporthe oryzae	reduced virulence	2	3	2	1	2	No	10
694	PHI:2215	BIM1	Magnaporthe oryzae	reduced virulence	2	2	1	2	0	No	7
695	PHI:872	MGG 03284	Magnaporthe oryzae	reduced virulence	2	2	0	1	1	No	6
696	PHI:9547	Moarf6	Magnaporthe oryzae	unaffected pathogenicity	5	5	6	7	6	No	29
697	PHI:6223	MoYvh1	Magnaporthe oryzae	reduced virulence	1	2	1	1	1	No	6
698	PHI:11084	MoMob1 (MGG 03151)	Magnaporthe oryzae	reduced virulence	1	1	1	1	1	No	5
699	PHI:2028	TGL1-2	Magnaporthe oryzae	unaffected pathogenicity	2	1	2	1	1	No	7
700	PHI:9199	MoCKb1 (MGG 00446)	Magnaporthe oryzae	reduced virulence unaffected pathogenicity	1	1	1	1	1	No	5
701	PHI:11056	MoHMT2 (MGG 17318)	Magnaporthe oryzae	reduced virulence	2	4	4	3	5	No	18
702	PHI:3976	MoIlv6	Magnaporthe oryzae	loss of pathogenicity	2	2	2	2	2	No	10
703	PHI:2016	PTH2	Magnaporthe oryzae	loss of pathogenicity	1	1	1	1	1	No	5
704	PHI:3234	MoLYS20	Magnaporthe oryzae	reduced virulence	2	1	1	1	1	No	6
705	PHI:10656	Hda1 (MGG 01076)	Magnaporthe oryzae	reduced virulence	3	3	3	5	4	No	18
706	PHI:877	MGG 00383	Magnaporthe oryzae	reduced virulence	1	1	1	1	1	No	5
707	PHI:2407	MoRIM15	Magnaporthe oryzae	reduced virulence	2	3	1	2	3	No	11
708	PHI:6780	MoCreC	Magnaporthe oryzae	reduced virulence	1	1	1	1	3	No	7
709	PHI:2101	MGG 11454.5	Magnaporthe oryzae	unaffected pathogenicity	1	1	1	1	1	No	5
710	PHI:2488	Man1	Magnaporthe oryzae	unaffected pathogenicity	3	2	1	2	5	No	13
711	PHI:4084;PHI:9785	MoPex19 Mopex19	Magnaporthe oryzae	loss of pathogenicity	1	0	1	1	1	No	4
712	PHI:1017;PHI:2067	ABC4	Magnaporthe oryzae	reduced virulence loss of pathogenicity	13	7	9	9	4	No	42
713	PHI:777	MGG 00883	Magnaporthe oryzae	loss of pathogenicity	3	3	4	2	1	No	13
714	PHI:9552	Mogga1	Magnaporthe oryzae	reduced virulence	1	1	1	1	0	No	4
715	PHI:6928	MoBRE1	Magnaporthe oryzae	reduced virulence	2	2	1	1	0	No	6
716	PHI:3173	Mosnf1	Magnaporthe oryzae	loss of pathogenicity	3	4	5	8	10	No	30
717	PHI:9956	RBP9 (MGG 00753)	Magnaporthe oryzae	reduced virulence	1	1	1	1	1	No	5
718	PHI:784	MGG 00056	Magnaporthe oryzae	reduced virulence	1	1	2	2	1	No	7
719	PHI:2196	MoRgs5	Magnaporthe oryzae	unaffected pathogenicity	0	0	0	1	0	No	1
720	PHI:2103	MGG 08710.5	Magnaporthe oryzae	unaffected pathogenicity	2	2	2	2	2	No	10
721	PHI:8928	MoSCAD2 (MGG 08690)	Magnaporthe oryzae	loss of pathogenicity	6	7	7	7	4	No	31
722	PHI:2161;PHI:11082	Sep-01 MoSep1 (MGG 04100)	Magnaporthe oryzae	loss of pathogenicity reduced virulence	7	8	8	4	4	No	31
723	PHI:11061	MoSwa2 (MGG 04080)	Magnaporthe oryzae	reduced virulence	1	1	0	1	1	No	4
724	PHI:2097	Neo1	Magnaporthe oryzae	loss of pathogenicity	2	2	2	1	1	No	8
725	PHI:3175	MoSnf4	Magnaporthe oryzae	loss of pathogenicity	1	1	1	1	2	No	6
726	PHI:7117	MoGSK1	Magnaporthe oryzae	loss of pathogenicity	1	1	1	1	2	No	6
727	PHI:8588	Moppe1	Magnaporthe oryzae	reduced virulence	4	4	4	4	3	No	19
728	PHI:11058	MoHSL7(MGG 03894)	Magnaporthe oryzae	reduced virulence	1	1	1	1	1	No	5
729	PHI:5034	MoADH1	Magnaporthe oryzae	unaffected pathogenicity	3	3	2	3	2	No	13
730	PHI:2172	TPS1	Magnaporthe oryzae	loss of pathogenicity	2	2	3	2	3	No	12
731	PHI:11101	UPL3 (MGG 03841)	Magnaporthe oryzae	reduced virulence	6	6	6	7	6	No	31
732	PHI:2100;PHI:9482	Spf1 Spf1 (MGG 12005)	Magnaporthe oryzae	reduced virulence loss of pathogenicity	1	1	1	1	1	No	5
733	PHI:2104	MGG 04159.5	Magnaporthe oryzae	unaffected pathogenicity	2	2	2	2	1	No	9
734	PHI:806	MGG 04137	Magnaporthe oryzae	reduced virulence	1	1	0	2	2	No	6
735	PHI:2171	Peroxisomal copper amine oxidase	Magnaporthe oryzae	reduced virulence	1	1	1	2	2	No	7
736	PHI:6639	Modnm3	Magnaporthe oryzae	unaffected pathogenicity	3	3	1	4	2	No	13
737	PHI:10425	PoMet3 (MGG 15027)	Magnaporthe oryzae	reduced virulence	2	1	2	2	2	No	9
738	PHI:2027	TGL1-1	Magnaporthe oryzae	unaffected pathogenicity	4	3	3	3	3	No	16
739	PHI:7793	Momyo2 (MGG 03060)	Magnaporthe oryzae	reduced virulence	3	2	1	1	2	No	9
740	PHI:893	MGG 02986	Magnaporthe oryzae	reduced virulence	5	5	5	4	7	No	26
741	PHI:6261	PsAAT3	Phytophthora sojae	reduced virulence	2	2	2	2	2	No	10
742	PHI:3530	PsMPK7	Phytophthora sojae	reduced virulence	1	1	1	2	1	No	6
743	PHI:3071	PsTatD4	Phytophthora sojae	reduced virulence	1	1	0	1	0	No	3
744	PHI:5016	Psimpa1	Phytophthora sojae	reduced virulence	4	4	3	5	3	No	19
745	PHI:5233	MoARG5 6	Magnaporthe oryzae	loss of pathogenicity	3	3	3	2	2	No	13
746	PHI:9055	MoIVD (MGG 02540)	Magnaporthe oryzae	reduced virulence	5	7	6	7	5	No	30
747	PHI:7322	PEBP2	Magnaporthe oryzae	unaffected pathogenicity	0	0	0	1	0	No	1
748	PHI:9586	XOC 3249	Xanthomonas oryzae	reduced virulence	1	1	1	1	0	No	4
749	PHI:7790	HisB	Xanthomonas oryzae	reduced virulence	1	0	1	1	1	No	4
750	PHI:4841	HshC	Xanthomonas oryzae	reduced virulence	1	0	1	1	0	No	3
751	PHI:2964	AsnB	Xanthomonas oryzae	reduced virulence	2	2	2	2	1	No	9
752	PHI:7754	AnkB (XOC 4324)	Xanthomonas oryzae	reduced virulence	0	1	0	2	1	No	4
753	PHI:7863	CPAR2 100540	Candida parapsilosis	reduced virulence	2	2	3	3	2	No	12
754	PHI:8696	CPAR2 106400	Candida parapsilosis	reduced virulence	1	2	1	1	0	No	5
755	PHI:2564	OLE1	Candida parapsilosis	reduced virulence	0	0	0	2	0	No	2
756	PHI:6075	Och1	Candida parapsilosis	reduced virulence	3	2	3	3	1	No	12
757	PHI:8509	Tex10	Trichoderma virens	increased virulence (hypervirulence)	1	1	1	1	1	No	5
758	PHI:8878	ChBUB2 (XP 018164413)	Colletotrichum higginsianum	reduced virulence	1	0	1	1	0	No	3
759	PHI:3594	Ptp2	Cryptococcus neoformans	reduced virulence	1	1	0	1	0	No	3
760	PHI:2710	MepB	Colletotrichum gloeosporioides	reduced virulence	1	3	1	1	1	No	7
761	PHI:3669	VdATG8	Verticillium dahliae	unaffected pathogenicity	1	1	1	1	1	No	5
762	PHI:612	Orf408	Salmonella enterica	reduced virulence	1	1	1	1	0	No	4
763	PHI:4844	FTR1	Rhizopus oryzae	reduced virulence	1	1	1	1	1	No	5
764	PHI:4842	Fob1	Rhizopus oryzae	reduced virulence	2	3	2	2	2	No	11
765	PHI:4843	Fob2	Rhizopus oryzae	reduced virulence	2	3	2	2	2	No	11
766	PHI:8645	FgLDHL1 (FGSG 00145)	Fusarium graminearum	reduced virulence	1	1	1	1	1	No	5
767	PHI:5881	PRB1	Fusarium graminearum	reduced virulence	2	2	2	1	2	No	9
768	PHI:1561	GzOB001	Fusarium graminearum	unaffected pathogenicity	2	2	1	2	1	No	8
769	PHI:8908	FgVPS28 (FGSG 00291)	Fusarium graminearum	reduced virulence	1	1	1	1	1	No	5
770	PHI:6258	DHS	Fusarium graminearum	increased virulence (hypervirulence) unaffected pathogenicity	1	1	1	1	1	No	5
771	PHI:1244	FGSG 00337	Fusarium graminearum	unaffected pathogenicity	6	6	6	7	6	No	31
772	PHI:1198	(Sc Ssk2/Ssk22)	Fusarium graminearum	reduced virulence	6	7	5	5	2	No	25
773	PHI:1256	FGSG 00433	Fusarium graminearum	unaffected pathogenicity	1	1	0	1	0	No	3
774	PHI:1241	FGSG 00469	Fusarium graminearum	unaffected pathogenicity	2	3	2	2	3	No	12
775	PHI:1208;PHI:3131	(Sc Sch9) FgSCH9	Fusarium graminearum	reduced virulence	0	1	0	1	2	No	4
776	PHI:4658	FgHXK1	Fusarium graminearum	reduced virulence	1	1	1	1	2	No	6
777	PHI:1629	GzWing001	Fusarium graminearum	unaffected pathogenicity	5	6	6	7	7	No	31
778	PHI:1562	GzOB002	Fusarium graminearum	lethal	6	8	8	6	7	No	35
779	PHI:1768	GzZC083	Fusarium graminearum	unaffected pathogenicity	1	0	0	1	1	No	3
780	PHI:10694	FgDnfC2 (FGSG 00595)	Fusarium graminearum	unaffected pathogenicity	0	0	0	3	3	No	6
781	PHI:1218;PHI:9822	FGSG 00677 Fg00677	Fusarium graminearum	lethal reduced virulence	1	2	1	1	1	No	6
782	PHI:1443;PHI:10551	GzGATA001 FgWC2 (FGSG 00710)	Fusarium graminearum Fusarium asiaticum	unaffected pathogenicity	2	1	1	3	2	No	9
783	PHI:1630	GzWing002	Fusarium graminearum	unaffected pathogenicity	2	2	2	2	2	No	10
784	PHI:1249	FGSG 00786	Fusarium graminearum	unaffected pathogenicity	1	1	1	3	3	No	9
785	PHI:9143	FgAP2beta (FGSG 00824)	Fusarium graminearum	reduced virulence	3	3	3	3	4	No	16
786	PHI:10481	Sey1 (FGSG 00833)	Fusarium graminearum	reduced virulence unaffected pathogenicity	1	4	2	1	1	No	9
787	PHI:9047	FgPah1 (FGSG 00866)	Fusarium graminearum	reduced virulence	2	2	2	2	0	No	8
788	PHI:9056	FgTRR (FGSG 00871)	Fusarium graminearum	reduced virulence	2	2	3	2	2	No	11
789	PHI:1565	GzOB005	Fusarium graminearum	unaffected pathogenicity	2	3	3	4	2	No	14
790	PHI:1631	GzWing003	Fusarium graminearum	unaffected pathogenicity	0	0	0	1	1	No	2
791	PHI:2908;PHI:9825	Cyp51B CYP51B	Fusarium graminearum	unaffected pathogenicity reduced virulence	0	0	0	1	1	No	2
792	PHI:1632	GzWing004	Fusarium graminearum	unaffected pathogenicity	2	2	2	2	1	No	9
793	PHI:5779	Fgsg01064	Fusarium graminearum	unaffected pathogenicity	1	1	1	1	1	No	5
794	PHI:9845	FgEaf6 (FGSG-01094.1)	Fusarium graminearum	reduced virulence	1	1	0	1	1	No	4
795	PHI:1633	GzWing005	Fusarium graminearum	unaffected pathogenicity	0	0	1	1	0	No	2
796	PHI:2351;PHI:2353	AMT1	Fusarium graminearum	reduced virulence	3	4	3	7	4	No	21
797	PHI:1219	FGSG 01137	Fusarium graminearum	lethal	1	1	1	1	2	No	6
798	PHI:6092	FgVps26	Fusarium graminearum	reduced virulence	1	1	1	1	1	No	5
799	PHI:1554	GzMyb018	Fusarium graminearum	unaffected pathogenicity	5	4	5	4	3	No	21
800	PHI:2714	PEX5	Fusarium graminearum	reduced virulence	2	2	1	1	1	No	7
801	PHI:1462;PHI:10388	GzCCAAT002 FCT1 (FGSG 01182)	Fusarium graminearum	reduced virulence	1	2	1	2	0	No	6
802	PHI:1204	(Sc Cbk1)	Fusarium graminearum	reduced virulence	1	1	1	1	1	No	5
803	PHI:1567	GzOB007	Fusarium graminearum	unaffected pathogenicity	1	1	1	1	2	No	6
804	PHI:1568	GzOB008	Fusarium graminearum	unaffected pathogenicity	1	1	1	1	1	No	5
805	PHI:1569	GzOB009	Fusarium graminearum	lethal	2	2	2	2	2	No	10
806	PHI:1454	GzAra002	Fusarium graminearum	unaffected pathogenicity	0	2	2	4	2	No	10
807	PHI:1212	(Sc Rim15)	Fusarium graminearum	reduced virulence	2	3	1	2	2	No	10
808	PHI:1273	FGSG 01347	Fusarium graminearum	unaffected pathogenicity	1	1	1	1	0	No	4
809	PHI:1251	FGSG 01506	Fusarium graminearum	unaffected pathogenicity	0	0	0	1	0	No	1
810	PHI:6093	FgVps29	Fusarium graminearum	reduced virulence	1	1	1	1	1	No	5
811	PHI:1620	GzJUM002	Fusarium graminearum	unaffected pathogenicity	0	2	2	2	1	No	7
812	PHI:1555	GzMyb019	Fusarium graminearum	unaffected pathogenicity	1	2	2	2	2	No	9
813	PHI:9155	FgPep12 (FGSG 01890)	Fusarium graminearum	reduced virulence	2	2	1	2	2	No	9
814	PHI:1541	GzFlbD	Fusarium graminearum	unaffected pathogenicity	8	9	9	8	5	No	39
815	PHI:1570	GzOB010	Fusarium graminearum	unaffected pathogenicity	4	5	5	4	5	No	23
816	PHI:7111	FgCAP1	Fusarium graminearum	reduced virulence	1	1	1	1	1	No	5
817	PHI:1542	GzMyb006	Fusarium graminearum	unaffected pathogenicity	2	2	2	1	3	No	10
818	PHI:1616	GzssDB001	Fusarium graminearum	unaffected pathogenicity	3	3	1	3	3	No	13
819	PHI:443	CBL1	Fusarium graminearum	reduced virulence	2	1	2	2	4	No	11
820	PHI:1571	GzOB011	Fusarium graminearum	unaffected pathogenicity	1	1	1	1	1	No	5
821	PHI:3037	FgERG5A	Fusarium graminearum	reduced virulence	3	3	2	3	1	No	12
822	PHI:1288;PHI:6300	FGSG 01963 FgPDK1	Fusarium graminearum	unaffected pathogenicity reduced virulence	1	2	2	2	1	No	8
823	PHI:1097	FGSG 01974	Fusarium graminearum	reduced virulence	1	1	2	2	2	No	8
824	PHI:6095	FgVps5	Fusarium graminearum	reduced virulence	1	1	1	1	2	No	6
825	PHI:6272	FgHSP90	Fusarium graminearum	reduced virulence	3	3	5	5	4	No	20
826	PHI:3138	ELP3	Fusarium graminearum	reduced virulence	1	0	1	1	1	No	4
827	PHI:733	FBP1	Fusarium graminearum	reduced virulence	9	7	6	8	3	No	33
828	PHI:1681	GzNF001	Fusarium graminearum	unaffected pathogenicity	6	6	5	6	7	No	30
829	PHI:1657	GzCCCH001	Fusarium graminearum	unaffected pathogenicity	7	10	5	8	9	No	39
830	PHI:1573	GzOB013	Fusarium graminearum	lethal	4	5	6	5	3	No	23
831	PHI:1269	FGSG 02488	Fusarium graminearum	unaffected pathogenicity	1	1	0	1	0	No	3
832	PHI:3035	FgERG3A	Fusarium graminearum	reduced virulence	2	2	2	1	2	No	9
833	PHI:744	ADE5	Fusarium graminearum	reduced virulence	2	2	2	2	2	No	10
834	PHI:1441	GzDDT	Fusarium graminearum	reduced virulence	1	1	1	1	0	No	4
835	PHI:1463	GzCCAAT003	Fusarium graminearum	unaffected pathogenicity	2	2	3	3	2	No	12
836	PHI:1574	GzOB014	Fusarium graminearum	lethal	4	6	5	5	5	No	25
837	PHI:9539	Dcs1 (FGSG 02678)	Fusarium graminearum	unaffected pathogenicity	1	1	1	1	1	No	5
838	PHI:7649	FgPR-IL-2	Fusarium graminearum	unaffected pathogenicity	2	2	2	2	0	No	8
839	PHI:6091	FgVps35	Fusarium graminearum	reduced virulence	2	2	2	2	1	No	9
840	PHI:1359	GzC2H019	Fusarium graminearum	unaffected pathogenicity	1	1	1	1	0	No	4
841	PHI:1193	(Sc Sky1)	Fusarium graminearum	reduced virulence	1	1	3	1	2	No	8
842	PHI:5897	FGSG 02976	Fusarium graminearum	unaffected pathogenicity	3	4	3	4	2	No	16
843	PHI:4659	FgHXK2	Fusarium graminearum	unaffected pathogenicity	1	1	1	1	2	No	6
844	PHI:1213	FGSG 05586	Fusarium graminearum	reduced virulence	1	2	1	1	1	No	6
845	PHI:721	GRS1	Fusarium graminearum	unaffected pathogenicity	0	0	3	2	1	No	6
846	PHI:10927	FgMsb3 (FGSG 04033)	Fusarium graminearum	reduced virulence	2	3	3	3	2	No	13
847	PHI:2326;PHI:2491;PHI:5720	PTC1 FgPTC1 ScOrtholog PTC1	Fusarium graminearum	reduced virulence unaffected pathogenicity	8	10	9	11	9	No	47
848	PHI:8913	FgVPS2 (FGSG 04112)	Fusarium graminearum	lethal	2	2	2	3	3	No	12
849	PHI:8909	FgVPS22 (FGSG 04120)	Fusarium graminearum	reduced virulence	1	1	1	1	1	No	5
850	PHI:1577	GzOB017	Fusarium graminearum	unaffected pathogenicity	1	1	1	1	1	No	5
851	PHI:1169;PHI:1172	HDF2	Fusarium graminearum	reduced virulence	3	3	3	5	4	No	18
852	PHI:2418;PHI:2419	CID1	Fusarium graminearum	reduced virulence	2	0	1	2	0	No	5
853	PHI:1177	Nrc-2	Fusarium graminearum	reduced virulence	1	1	1	2	1	No	6
854	PHI:1289	FGSG 04416	Fusarium graminearum	unaffected pathogenicity	2	4	3	3	2	No	14
855	PHI:1175;PHI:6148	(Sc Srb10) FgSsn3	Fusarium graminearum	reduced virulence	1	1	1	2	1	No	6
856	PHI:1578	GzOB018	Fusarium graminearum	unaffected pathogenicity	2	1	2	2	2	No	9
857	PHI:3697;PHI:3925	FgABC1 FgABC3	Fusarium graminearum	reduced virulence	6	8	12	16	16	No	58
858	PHI:1369	GzC2H031	Fusarium graminearum	unaffected pathogenicity	1	1	1	1	0	No	4
859	PHI:7718	FgOXP2	Fusarium graminearum	reduced virulence	1	1	1	1	1	No	5
860	PHI:1580	GzOB020	Fusarium graminearum	unaffected pathogenicity	3	4	3	3	3	No	16
861	PHI:9096	Fgdid2 (FGSG 05094)	Fusarium graminearum	loss of pathogenicity	1	1	1	1	1	No	5
862	PHI:1274	FGSG 05135	Fusarium graminearum	unaffected pathogenicity	3	3	1	5	3	No	15
863	PHI:9157;PHI:10691	FgNeo1 (FGSG 05149) FgDnfD (FGSG 05149)	Fusarium graminearum	reduced virulence	0	0	2	1	1	No	4
864	PHI:1484	GzHMG016	Fusarium graminearum	unaffected pathogenicity	0	0	0	1	0	No	1
865	PHI:8911	FgVPS36 (FGSG 05263)	Fusarium graminearum	reduced virulence	1	1	1	1	1	No	5
866	PHI:1464;PHI:8923;PHI:10389	GzCCAAT004 FgHLTF1 (FGSG 05304) FCT2 (FGSG 05304)	Fusarium graminearum	reduced virulence	1	0	1	1	1	No	4
867	PHI:1222	FGSG 05306	Fusarium graminearum	lethal	4	3	2	1	2	No	12
868	PHI:6408;PHI:6603	FgCdc3 FaCdc3 (FGSG 05315.3)	Fusarium graminearum Fusarium asiaticum	reduced virulence	1	1	1	1	1	No	5
869	PHI:1638	GzWing010	Fusarium graminearum	unaffected pathogenicity	1	1	1	1	1	No	5
870	PHI:1223	FGSG 05393	Fusarium graminearum	lethal	8	8	9	8	7	No	40
871	PHI:1268	FGSG 05406	Fusarium graminearum	unaffected pathogenicity	5	5	5	6	5	No	26
872	PHI:1214	FGSG 07816	Fusarium graminearum	reduced virulence	4	5	8	5	9	No	31
873	PHI:1465	GzCCAAT005	Fusarium graminearum	unaffected pathogenicity	2	2	1	1	2	No	8
874	PHI:1176	(Sc Atg1)	Fusarium graminearum	reduced virulence	1	1	1	1	0	No	4
875	PHI:5028	Gta1	Fusarium graminearum	unaffected pathogenicity reduced virulence	1	1	2	2	3	No	9
876	PHI:5784	Fgsg05579	Fusarium graminearum	unaffected pathogenicity	1	1	1	2	2	No	7
877	PHI:1259	FGSG 05586	Fusarium graminearum	unaffected pathogenicity	2	5	3	2	3	No	15
878	PHI:1170;PHI:1174	HDF3	Fusarium graminearum	unaffected pathogenicity reduced virulence	1	2	0	1	2	No	6
879	PHI:1181	(Sc Kic1)	Fusarium graminearum	reduced virulence	9	16	11	9	7	No	52
880	PHI:1225	FGSG 05775	Fusarium graminearum	lethal	3	4	2	2	2	No	13
881	PHI:1226	FGSG 05845	Fusarium graminearum	lethal	2	2	2	1	2	No	9
882	PHI:1375	GzC2H038	Fusarium graminearum	unaffected pathogenicity	1	1	1	1	2	No	6
883	PHI:1640	GzWing012	Fusarium graminearum	unaffected pathogenicity	2	1	1	2	1	No	7
884	PHI:1376	GzC2H039	Fusarium graminearum	unaffected pathogenicity	1	1	2	1	1	No	6
885	PHI:2387	ACL2	Fusarium graminearum	loss of pathogenicity	1	1	1	1	1	No	5
886	PHI:1227	FGSG 06089	Fusarium graminearum	lethal	7	7	6	8	6	No	34
887	PHI:1517	GzHOMEL013	Fusarium graminearum	lethal	1	1	0	1	0	No	3
888	PHI:1582	GzOB022	Fusarium graminearum	unaffected pathogenicity	1	1	1	1	1	No	5
889	PHI:1487	GzHMG019	Fusarium graminearum	unaffected pathogenicity	2	2	2	3	1	No	10
890	PHI:1317	GzBrom002	Fusarium graminearum	reduced virulence	3	3	2	3	3	No	14
891	PHI:309;PHI:3517;PHI:1189;PHI:4245;PHI:5479	MAP1 (related: GPMK1)	Fusarium graminearum	loss of pathogenicity reduced virulence	1	1	2	2	1	No	7
892	PHI:1379	GzC2H042	Fusarium graminearum	reduced virulence	2	2	1	2	2	No	9
893	PHI:1228	FGSG 06502	Fusarium graminearum	lethal	2	1	1	2	2	No	8
894	PHI:5899	FGSG 06572	Fusarium graminearum	unaffected pathogenicity	0	0	0	2	0	No	2
895	PHI:6122;PHI:5741	FGSG 06610 ScOrtholog YKL153W	Fusarium graminearum	reduced virulence	1	0	0	1	1	No	3
896	PHI:7124	FgEB1	Fusarium graminearum	reduced virulence	1	1	1	1	1	No	5
897	PHI:10692	FgDnfB (FGSG 06743)	Fusarium graminearum	unaffected pathogenicity reduced virulence	2	2	2	2	1	No	9
898	PHI:5029	Gta2	Fusarium graminearum	unaffected pathogenicity reduced virulence	5	5	6	5	4	No	25
899	PHI:1547	GzMyb011	Fusarium graminearum	unaffected pathogenicity	1	1	1	1	0	No	4
900	PHI:1248	FGSG 06832	Fusarium graminearum	unaffected pathogenicity	1	2	1	2	1	No	7
901	PHI:1622	GzJUM004	Fusarium graminearum	unaffected pathogenicity	2	3	4	3	1	No	13
902	PHI:8743	FgPEX4 (FGSG 06857)	Fusarium graminearum	reduced virulence	12	14	13	9	13	No	61
903	PHI:1658	GzCCCH002	Fusarium graminearum	unaffected pathogenicity	1	1	1	1	1	No	5
904	PHI:1291	TOP1	Fusarium graminearum	reduced virulence	2	2	3	2	1	No	10
905	PHI:1584	GzOB024	Fusarium graminearum	unaffected pathogenicity	2	2	2	2	2	No	10
906	PHI:1250	FGSG 06940	Fusarium graminearum	unaffected pathogenicity	2	2	2	1	0	No	7
907	PHI:1529	Gzscp	Fusarium graminearum	reduced virulence	1	2	1	1	0	No	5
908	PHI:1096	FGSG 07062	Fusarium graminearum	unaffected pathogenicity	1	1	1	1	1	No	5
909	PHI:9223	FgPEX10 (FGSG 07078)	Fusarium graminearum	reduced virulence	4	4	4	2	1	No	15
910	PHI:1466	GzCCAAT006	Fusarium graminearum	unaffected pathogenicity	3	3	2	3	0	No	11
911	PHI:1587	GzOB027	Fusarium graminearum	unaffected pathogenicity	5	8	5	6	6	No	30
912	PHI:1489	GzHMG021	Fusarium graminearum	unaffected pathogenicity	2	2	2	2	1	No	9
913	PHI:1257	FGSG 07121	Fusarium graminearum	unaffected pathogenicity	9	6	7	7	8	No	37
914	PHI:1491	GzHMG023	Fusarium graminearum	lethal	1	1	1	1	1	No	5
915	PHI:724;PHI:730	PKS9 KSA1	Fusarium graminearum	unaffected pathogenicity	3	3	3	3	3	No	15
916	PHI:1199;PHI:3087	(Sc Tpk2) CPK1	Fusarium graminearum	reduced virulence loss of pathogenicity	3	3	1	5	2	No	14
917	PHI:1200;PHI:4587	(Gsk3) Fgk3	Fusarium graminearum	reduced virulence loss of pathogenicity	2	2	1	2	1	No	8
918	PHI:1216	FGSG 07344	Fusarium graminearum	reduced virulence	2	3	3	2	4	No	14
919	PHI:6410;PHI:6604	FgCdc12 FaCdc12(FGSG 07380)	Fusarium graminearum Fusarium asiaticum	reduced virulence	1	1	1	1	1	No	5
920	PHI:1287	FGSG 07381	Fusarium graminearum	unaffected pathogenicity	1	2	2	2	1	No	8
921	PHI:1388	GzC2H051	Fusarium graminearum	unaffected pathogenicity	1	1	1	1	1	No	5
922	PHI:3863	FgGAL83	Fusarium graminearum	reduced virulence	2	2	2	2	1	No	9
923	PHI:1232	FGSG 07423	Fusarium graminearum	lethal	1	1	1	1	1	No	5
924	PHI:6245	FaMyo2B	Fusarium graminearum	reduced virulence	7	7	4	4	5	No	27
925	PHI:1393	GzC2H056	Fusarium graminearum	unaffected pathogenicity	2	3	3	2	0	No	10
926	PHI:719	GzFUS1	Fusarium graminearum	unaffected pathogenicity	0	25	20	17	7	No	69
927	PHI:1493	GzHMG025	Fusarium graminearum	unaffected pathogenicity	1	1	0	1	1	No	4
928	PHI:1397	GzC2H060	Fusarium graminearum	unaffected pathogenicity	1	1	1	1	1	No	5
929	PHI:5889	FGSG 08012	Fusarium graminearum	unaffected pathogenicity	0	0	0	1	0	No	1
930	PHI:1234	FGSG 08133	Fusarium graminearum	lethal	5	5	5	7	4	No	26
931	PHI:5890	FGSG 08464	Fusarium graminearum	unaffected pathogenicity	1	1	2	2	1	No	7
932	PHI:10615	FgCrpA (FGRAMPH1 01G10037)	Fusarium graminearum	reduced virulence	6	7	4	6	7	No	30
933	PHI:1178;PHI:4941	(Sc Cdc28) Cdc2A	Fusarium graminearum	reduced virulence lethal loss of pathogenicity	7	7	7	7	5	No	33
934	PHI:1646	GzWing018	Fusarium graminearum	reduced virulence	1	2	2	3	2	No	10
935	PHI:5783	Fgsg08496	Fusarium graminearum	unaffected pathogenicity	1	1	1	2	2	No	7
936	PHI:6183	FgVps27	Fusarium graminearum	reduced virulence	1	1	1	1	0	No	4
937	PHI:1627	GzTF2S002	Fusarium graminearum	unaffected pathogenicity	3	3	2	1	3	No	12
938	PHI:10690	FgDnfA (FGSG 08595)	Fusarium graminearum	reduced virulence	2	2	2	2	2	No	10
939	PHI:1187	(Sc Dbf2/Dbf20)	Fusarium graminearum	reduced virulence	1	0	0	1	1	No	3
940	PHI:1589	GzOB029	Fusarium graminearum	unaffected pathogenicity	1	1	1	1	1	No	5
941	PHI:1590	GzOB030	Fusarium graminearum	lethal	1	1	1	1	1	No	5
942	PHI:1530	Gzsnd	Fusarium graminearum	unaffected pathogenicity	1	1	1	3	3	No	9
943	PHI:1240;PHI:3088	FGSG 08729 CPK2	Fusarium graminearum	unaffected pathogenicity loss of pathogenicity	0	1	1	3	2	No	7
944	PHI:1091;PHI:1591;PHI:8366	FGSG 08737 GzOB031	Fusarium graminearum	unaffected pathogenicity reduced virulence	0	0	1	1	0	No	2
945	PHI:1406	GzC2H070	Fusarium graminearum	lethal	1	1	1	1	1	No	5
946	PHI:1595	GzOB035	Fusarium graminearum	unaffected pathogenicity	2	1	2	2	2	No	9
947	PHI:1666	GzCCHC006	Fusarium graminearum	unaffected pathogenicity	1	1	1	1	1	No	5
948	PHI:1407	GzC2H071	Fusarium graminearum	lethal	4	5	5	3	1	No	18
949	PHI:7672	FgLetm1	Fusarium graminearum	reduced virulence	0	1	1	1	1	No	4
950	PHI:1467	GzCCAAT007	Fusarium graminearum	unaffected pathogenicity	2	2	2	3	0	No	9
951	PHI:1167	NPC1	Fusarium graminearum	reduced virulence	1	1	1	3	0	No	6
952	PHI:1597	GzOB037	Fusarium graminearum	unaffected pathogenicity	1	0	1	1	0	No	3
953	PHI:1236	FGSG 09408	Fusarium graminearum	lethal	2	1	2	2	5	No	12
954	PHI:6409	FgCdc11	Fusarium graminearum	reduced virulence	1	1	1	1	0	No	4
955	PHI:9360	Fgbat1/2 (FGSG 09512)	Fusarium graminearum	unaffected pathogenicity	2	2	2	2	2	No	10
956	PHI:1246	FGSG 09513	Fusarium graminearum	unaffected pathogenicity	1	1	1	1	2	No	6
957	PHI:1449	GzGATA007	Fusarium graminearum	unaffected pathogenicity	4	0	6	4	0	No	14
958	PHI:9357	Fgleu1 (FGSG 09589)	Fusarium graminearum	loss of pathogenicity	3	3	3	3	2	No	14
959	PHI:1598	GzOB038	Fusarium graminearum	reduced virulence	1	0	1	1	1	No	4
960	PHI:1599	GzOB039	Fusarium graminearum	unaffected pathogenicity	1	1	1	1	0	No	4
961	PHI:1649	GzWing021	Fusarium graminearum	unaffected pathogenicity	1	1	1	1	1	No	5
962	PHI:1551	GzMyb015	Fusarium graminearum	unaffected pathogenicity	8	9	10	8	5	No	40
963	PHI:1615	GzSGT1	Fusarium graminearum	unaffected pathogenicity	2	1	0	1	1	No	5
964	PHI:1414	GzC2H081	Fusarium graminearum	unaffected pathogenicity	10	10	12	11	13	No	56
965	PHI:9974	Srp1	Fusarium graminearum	reduced virulence	1	2	2	2	1	No	8
966	PHI:1667	GzCCHC007	Fusarium graminearum	unaffected pathogenicity	1	1	1	1	1	No	5
967	PHI:1197;PHI:3862	(Snf1) FgSNF1	Fusarium graminearum	reduced virulence	8	8	8	8	10	No	42
968	PHI:2396	GzSYN2	Fusarium graminearum	reduced virulence	1	1	1	1	1	No	5
969	PHI:2728	FgERG4	Fusarium graminearum	reduced virulence	0	0	1	1	1	No	3
970	PHI:1203	(Sc Yck1/2/3)	Fusarium graminearum	reduced virulence	4	4	3	5	4	No	20
971	PHI:1772	GzZC087	Fusarium graminearum	reduced virulence	4	4	4	2	3	No	17
972	PHI:8915	FgVPS32 (FGSG 10092)	Fusarium graminearum	lethal	3	3	2	2	2	No	12
973	PHI:1210	FGSG 10095	Fusarium graminearum	reduced virulence	6	7	7	7	9	No	36
974	PHI:1533	GzLam002	Fusarium graminearum	reduced virulence	1	0	0	1	1	No	3
975	PHI:1247	FGSG 10196	Fusarium graminearum	unaffected pathogenicity	2	1	1	2	2	No	8
976	PHI:7717	FgOXP1	Fusarium graminearum	reduced virulence	1	1	1	1	1	No	5
977	PHI:5765;PHI:9049	ScOrtholog NEM1 FgNem1 (FGSG 10302)	Fusarium graminearum	reduced virulence	4	4	4	5	3	No	20
978	PHI:1196	(Mgv1)	Fusarium graminearum	reduced virulence	0	0	1	1	1	No	3
979	PHI:9095	Fgvps60 (FGSG 10503)	Fusarium graminearum	loss of pathogenicity	2	2	2	1	1	No	8
980	PHI:11145	FgStu2 (FGSG 10528)	Fusarium graminearum	reduced virulence	1	1	1	1	1	No	5
981	PHI:5895	FGSG 10712	Fusarium graminearum	unaffected pathogenicity	2	2	2	1	0	No	7
982	PHI:2352;PHI:2354	AMT2	Fusarium graminearum	unaffected pathogenicity reduced virulence	3	4	4	4	6	No	21
983	PHI:1238	FGSG 10725	Fusarium graminearum	lethal	4	6	7	8	13	No	38
984	PHI:1604	GzOB045	Fusarium graminearum	unaffected pathogenicity	1	1	1	1	1	No	5
985	PHI:1605	GzOB046	Fusarium graminearum	unaffected pathogenicity	3	1	3	3	4	No	14
986	PHI:442	MSY1	Fusarium graminearum	reduced virulence	2	1	0	1	1	No	5
987	PHI:8914	FgVPS24 (FGSG 10832)	Fusarium graminearum	lethal	2	2	2	2	1	No	9
988	PHI:5068	MCC	Fusarium graminearum	reduced virulence	7	6	7	7	4	No	31
989	PHI:1500	GzHMG032	Fusarium graminearum	unaffected pathogenicity	9	6	10	8	6	No	39
990	PHI:9041	Fgm9 (FGSG 10989)	Fusarium graminearum	reduced virulence	1	1	2	1	5	No	10
991	PHI:9038	Fgm3 (FGSG 10993)	Fusarium graminearum	reduced virulence	1	1	1	1	1	No	5
992	PHI:9037	Fgm4 (FGSG 10994)	Fusarium graminearum	reduced virulence	2	4	2	3	1	No	12
993	PHI:3924;PHI:8224;PHI:9036	FgABC1 Fg10995 Fgm5 (FGSG 10995)	Fusarium graminearum	reduced virulence	9	11	11	11	10	No	52
994	PHI:1424	GzC2H092	Fusarium graminearum	unaffected pathogenicity	1	1	1	2	0	No	5
995	PHI:5900	FGSG 11472	Fusarium graminearum	unaffected pathogenicity	0	0	0	1	0	No	1
996	PHI:1217	FGSG 00792	Fusarium graminearum	reduced virulence	0	0	0	2	2	No	4
997	PHI:1685	GzRad003	Fusarium graminearum	unaffected pathogenicity	3	3	3	3	2	No	14
998	PHI:9538	Acd2 (FGSG 12669)	Fusarium graminearum	unaffected pathogenicity	1	1	1	2	1	No	6
999	PHI:9517	FgEch1 (FGSG 13111)	Fusarium graminearum	reduced virulence	8	8	6	9	6	No	37
1000	PHI:1606	GzOB047	Fusarium graminearum	reduced virulence	2	1	1	1	1	No	6
1001	PHI:1623	GzJUM005	Fusarium graminearum	unaffected pathogenicity	3	4	4	3	1	No	15
1002	PHI:1607	GzOB048	Fusarium graminearum	unaffected pathogenicity	1	0	1	1	0	No	3
1003	PHI:5882	FGSG 13826	Fusarium graminearum	unaffected pathogenicity	2	2	2	2	2	No	10
1004	PHI:1528	GzHOMEL041	Fusarium graminearum	unaffected pathogenicity	0	0	0	1	1	No	2
1005	PHI:6207	BbCyp6	Beauveria bassiana	reduced virulence	4	4	4	6	5	No	23
1006	PHI:6209	BbCyp9	Beauveria bassiana	unaffected pathogenicity	4	4	4	4	4	No	20
1007	PHI:6208	BbCyp8	Beauveria bassiana	unaffected pathogenicity	7	6	7	6	6	No	32
1008	PHI:2339	UhCnb1	Ustilago hordei	reduced virulence	5	4	3	5	3	No	20
1009	PHI:2585;PHI:2606	SKN7	Alternaria alternata	reduced virulence	1	1	1	1	1	No	5
1010	PHI:4926	Rs-CRT	Radopholus similis	reduced virulence	1	1	1	1	1	No	5
1011	PHI:7596	MakatG1	Metarhizium acridum	reduced virulence unaffected pathogenicity	0	0	0	2	2	No	4
1012	PHI:7115	LipQ	Mycobacterium tuberculosis	unaffected pathogenicity	1	1	1	1	1	No	5
1013	PHI:7155	Pmr1	Beauveria bassiana	reduced virulence	2	2	1	3	0	No	8
1014	PHI:7152	PmcB	Beauveria bassiana	reduced virulence	5	6	4	4	3	No	22
1015	PHI:7872	Gcn5 (BBA 05250)	Beauveria bassiana	reduced virulence	3	4	4	5	4	No	20
1016	PHI:6875	BbVmaH	Beauveria bassiana	reduced virulence	1	1	1	1	1	No	5
1017	PHI:5037	OpS1	Beauveria bassiana	reduced virulence	12	1	4	2	0	No	19
1018	PHI:3271	ARSEF 2860	Beauveria bassiana	reduced virulence	1	2	0	1	1	No	5
1019	PHI:3068	BbAC	Beauveria bassiana	reduced virulence	7	5	9	9	8	No	38
1020	PHI:6972	TpsA	Beauveria bassiana	reduced virulence	1	1	3	2	3	No	10
1021	PHI:4783;PHI:8631	Fkh2	Beauveria bassiana	reduced virulence	1	1	1	1	1	No	5
1022	PHI:7150	Eca1	Beauveria bassiana	reduced virulence	2	2	2	3	3	No	12
1023	PHI:9444	Bbakr1 (XP 008600433.1)	Beauveria bassiana	unaffected pathogenicity	6	8	8	7	7	No	36
1024	PHI:7181	CypB	Beauveria bassiana	reduced virulence	10	13	11	9	10	No	53
1025	PHI:6280	Bmiro	Beauveria bassiana	reduced virulence	1	1	1	1	1	No	5
1026	PHI:4107	BbMBF1	Beauveria bassiana	reduced virulence	1	0	0	1	1	No	3
1027	PHI:3097	Kre2/Mnt1	Beauveria bassiana	reduced virulence	1	1	1	1	5	No	9
1028	PHI:9046	BbATG7 (BBA 08545)	Beauveria bassiana	reduced virulence	1	1	1	1	1	No	5
1029	PHI:7153	PmcC	Beauveria bassiana	reduced virulence	5	6	7	4	4	No	26
1030	PHI:7154	Spf1	Beauveria bassiana	reduced virulence	1	1	2	1	1	No	6
1031	PHI:9102	BbRei1 (BBA 05861)	Beauveria bassiana	reduced virulence	1	1	1	2	1	No	6
1032	PHI:4917	BbbqrA	Beauveria bassiana	reduced virulence increased virulence (hypervirulence) unaffected pathogenicity	3	2	3	2	4	No	14
1033	PHI:3096	Ktr4	Beauveria bassiana	reduced virulence	1	1	1	1	0	No	4
1034	PHI:9409	Krs (BBA 03037)	Beauveria bassiana	reduced virulence	3	3	3	3	3	No	15
1035	PHI:7151	PmcA	Beauveria bassiana	reduced virulence	5	6	4	2	3	No	20
1036	PHI:10407	RAD23 (BBA 01030)	Beauveria bassiana	reduced virulence	1	2	1	1	1	No	6
1037	PHI:3270	ARSEF 2860	Beauveria bassiana	reduced virulence	1	2	0	1	1	No	5
1038	PHI:6470	Trr1	Beauveria bassiana	unaffected pathogenicity	2	2	3	2	2	No	11
1039	PHI:2913;PHI:2933	AaNoxB NoxB	Alternaria alternata	reduced virulence loss of pathogenicity	1	0	0	1	0	No	2
1040	PHI:10988	YagT	Escherichia coli	unaffected pathogenicity	1	1	1	1	1	No	5
1041	PHI:3802	Vcx1	Cryptococcus neoformans	reduced virulence	2	2	2	2	1	No	9
1042	PHI:8794	Ssn8 (CNAG 00440)	Cryptococcus neoformans	reduced virulence	1	1	1	1	0	No	4
1043	PHI:9999;PHI:10323	Atg2 (CNAG 06732)	Cryptococcus neoformans	unaffected pathogenicity	1	1	1	1	0	No	4
1044	PHI:7879	Cer1 (CNAG 06717)	Cryptococcus neoformans	reduced virulence	1	3	2	2	2	No	10
1045	PHI:2955	PKH2-02	Cryptococcus neoformans	loss of pathogenicity	1	0	2	2	1	No	6
1046	PHI:8615	Grx4 (CNAG 02950)	Cryptococcus neoformans	loss of pathogenicity	6	7	4	5	7	No	29
1047	PHI:3515	Gat1	Cryptococcus neoformans	unaffected pathogenicity	0	0	1	2	0	No	3
1048	PHI:3455	Apt1	Cryptococcus neoformans	reduced virulence	1	1	1	1	0	No	4
1049	PHI:6480	LYS4	Cryptococcus neoformans	reduced virulence	1	1	1	1	1	No	5
1050	PHI:10000;PHI:10324	Atg3 (CNAG 06892)	Cryptococcus neoformans	unaffected pathogenicity	1	1	1	1	1	No	5
1051	PHI:10352	Alg3 (CNAG 05142)	Cryptococcus neoformans	loss of pathogenicity unaffected pathogenicity reduced virulence	1	1	1	1	1	No	5
1052	PHI:7812	Mgt1 (CNAG 03901)	Cryptococcus neoformans	unaffected pathogenicity	4	5	5	2	1	No	17
1053	PHI:4785;PHI:6585	PFA4 Pfa4	Cryptococcus neoformans	loss of pathogenicity reduced virulence	3	3	4	4	4	No	18
1054	PHI:8017	Hos3 (CNAG 00660)	Cryptococcus neoformans	unaffected pathogenicity	1	2	2	1	2	No	8
1055	PHI:3098	URA4	Cryptococcus neoformans	reduced virulence	1	1	1	1	2	No	6
1056	PHI:4642	VPS20	Cryptococcus neoformans	loss of pathogenicity	1	1	1	1	1	No	5
1057	PHI:10006;PHI:10330	Atg9 (CNAG 01445)	Cryptococcus neoformans	reduced virulence	1	1	1	2	1	No	6
1058	PHI:11022	Pho81 (CNAG 02541)	Cryptococcus neoformans	reduced virulence	2	2	3	1	1	No	9
1059	PHI:11158	Ubi1 (CNAG 00370)	Cryptococcus neoformans	reduced virulence	9	11	10	4	4	No	38
1060	PHI:10014;PHI:10335	Atg18 (CNAG 02269)	Cryptococcus neoformans	unaffected pathogenicity loss of pathogenicity	2	2	2	2	2	No	10
1061	PHI:4883	Kcs1	Cryptococcus neoformans	reduced virulence loss of pathogenicity	1	1	1	1	1	No	5
1062	PHI:7880	Cer2 (CNAG 02086)	Cryptococcus neoformans	unaffected pathogenicity	1	3	2	2	2	No	10
1063	PHI:3457	PHO84	Cryptococcus neoformans	reduced virulence	0	1	1	3	1	No	6
1064	PHI:10355	Alg12 (CNAG 02715)	Cryptococcus neoformans	reduced virulence	1	1	1	1	1	No	5
1065	PHI:4640	VPS27	Cryptococcus neoformans	loss of pathogenicity	1	1	1	1	1	No	5
1066	PHI:10001;PHI:10325	Atg4 (CNAG 02662)	Cryptococcus neoformans	unaffected pathogenicity reduced virulence	1	1	1	1	1	No	5
1067	PHI:7829	Uxt2	Cryptococcus neoformans	reduced virulence unaffected pathogenicity	6	6	6	8	7	No	33
1068	PHI:7828	Uxt1	Cryptococcus neoformans	reduced virulence unaffected pathogenicity	10	11	9	9	8	No	47
1069	PHI:4211	FRE3	Cryptococcus neoformans	increased virulence (hypervirulence)	2	1	1	1	1	No	6
1070	PHI:4641	VPS22	Cryptococcus neoformans	loss of pathogenicity	1	1	1	1	1	No	5
1071	PHI:7178	Ape4	Cryptococcus neoformans	reduced virulence	1	1	1	1	1	No	5
1072	PHI:10473	Erg6 (CNAG 03819)	Cryptococcus neoformans	reduced virulence	4	4	4	2	1	No	15
1073	PHI:3528	PHO89	Cryptococcus neoformans	reduced virulence	1	1	1	1	1	No	5
1074	PHI:8014	Rpd3 (CNAG 05690)	Cryptococcus neoformans	reduced virulence	3	2	3	4	2	No	14
1075	PHI:8969	Bta1 (CNAG 02353)	Cryptococcus neoformans	reduced virulence	0	0	2	2	2	No	6
1076	PHI:2968	Hxs1	Cryptococcus neoformans	reduced virulence	4	7	4	8	9	No	32
1077	PHI:3529	VTC4	Cryptococcus neoformans	increased virulence (hypervirulence)	6	7	6	6	7	No	32
1078	PHI:7881	Cer3 (CNAG 02087)	Cryptococcus neoformans	unaffected pathogenicity	1	3	2	2	2	No	10
1079	PHI:3801	Pmc1	Cryptococcus neoformans	reduced virulence	5	6	8	4	3	No	26
1080	PHI:7208	Mlh1	Cryptococcus neoformans	unaffected pathogenicity	3	3	2	3	3	No	14
1081	PHI:11201	Apn2 (CNAG 04268)	Cryptococcus neoformans	reduced virulence	2	1	2	3	1	No	9
1082	PHI:10004;PHI:10328	Atg7 (CNAG 04538)	Cryptococcus neoformans	reduced virulence	2	3	2	1	1	No	9
1083	PHI:8015	Clr62 (CNAG 05276)	Cryptococcus neoformans	reduced virulence	0	1	0	2	0	No	3
1084	PHI:7186	ADE13	Cryptococcus neoformans	reduced virulence	2	1	2	2	2	No	9
1085	PHI:6241	Zip2	Cryptococcus neoformans	unaffected pathogenicity reduced virulence	2	2	2	3	1	No	10
1086	PHI:8012	Hda1 (CNAG 01563)	Cryptococcus neoformans	reduced virulence	3	3	3	4	3	No	16
1087	PHI:6240	Zip1	Cryptococcus neoformans	reduced virulence	3	3	2	3	2	No	13
1088	PHI:3331;PHI:4643	Snf7 SNF7	Cryptococcus neoformans	loss of pathogenicity	2	2	2	2	2	No	10
1089	PHI:8018	Clr61 (CNAG 01699)	Cryptococcus neoformans	unaffected pathogenicity	0	0	0	1	0	No	1
1090	PHI:6871	Gua1	Cryptococcus neoformans	loss of pathogenicity	1	1	1	1	1	No	5
1091	PHI:3024	Cln1	Cryptococcus neoformans	unaffected pathogenicity	2	2	2	3	2	No	11
1092	PHI:8793	Cdk8 (CNAG 06086)	Cryptococcus neoformans	reduced virulence	1	1	1	1	1	No	5
1093	PHI:7944	Uut1 (CNAG 06230)	Cryptococcus neoformans	loss of pathogenicity	11	9	8	10	10	No	48
1094	PHI:6889	Cdc50	Cryptococcus neoformans	loss of pathogenicity	1	1	1	1	1	No	5
1095	PHI:10476	Liv4 (CNAG 06283)	Cryptococcus neoformans	reduced virulence	2	2	1	2	3	No	10
1096	PHI:10354	Alg9 (CNAG 05881)	Cryptococcus neoformans	reduced virulence	1	1	1	1	1	No	5
1097	PHI:7867;PHI:9900	Had1 (CNAG 01744) Gpp2 (CNAG 01744)	Cryptococcus neoformans	reduced virulence	0	1	1	2	1	No	5
1098	PHI:10003;PHI:10327	Atg6 (CNAG 01773)	Cryptococcus neoformans	loss of pathogenicity	1	1	1	1	1	No	5
1099	PHI:9425	Itr4 (CNAG 05662)	Cryptococcus neoformans	reduced virulence	2	2	2	5	4	No	15
1100	PHI:10017	Atg24 (CNAG 01554)	Cryptococcus neoformans	reduced virulence	1	1	1	1	1	No	5
1101	PHI:3527	PHO840	Cryptococcus neoformans	reduced virulence	0	1	1	2	1	No	5
1102	PHI:8013	Hos2 (CNAG 05563)	Cryptococcus neoformans	reduced virulence	1	1	0	1	0	No	3
1103	PHI:11078	Fpnuc1 (FPSE 01560)	Fusarium pseudograminearum	unaffected pathogenicity	0	1	1	1	1	No	4
1104	PHI:4584	FkpA	Cronobacter universalis	reduced virulence	3	4	4	4	4	No	19
1105	PHI:6730;PHI:8736	PdMpkB Kss1 (PDIG 75030)	Penicillium digitatum	reduced virulence	5	4	5	4	5	No	23
1106	PHI:6681	Pdac1	Penicillium digitatum	reduced virulence	5	2	3	7	4	No	21
1107	PHI:4520	PdMit1	Penicillium digitatum	unaffected pathogenicity	3	3	2	3	1	No	12
1108	PHI:6128	Ku70	Penicillium digitatum	unaffected pathogenicity	1	0	1	2	1	No	5
1109	PHI:10888	EfeA (PDIP 08660)	Penicillium digitatum	unaffected pathogenicity	1	1	1	1	1	No	5
1110	PHI:4506	So (soft)	Epichloe festucae	increased virulence (hypervirulence)	1	1	1	1	0	No	4
1111	PHI:10459	Gtb1	Magnaporthe oryzae	reduced virulence	1	1	1	2	2	No	7
1112	PHI:3132	Mosch9	Magnaporthe oryzae	reduced virulence	1	3	2	2	0	No	8
1113	PHI:10457	Gls1	Magnaporthe oryzae	reduced virulence	1	2	2	1	0	No	6
1114	PHI:3630	PepN	Mycobacterium tuberculosis	increased virulence (hypervirulence)	3	3	3	3	3	No	15
1115	PHI:3595	Ptp1	Cryptococcus neoformans	unaffected pathogenicity reduced virulence	1	1	1	1	0	No	4
1116	PHI:9826	CYP51C	Fusarium graminearum	reduced virulence	1	0	0	1	0	No	2
1117	PHI:9711	AGLIP1	Rhizoctonia solani	effector (plant avirulence determinant)	6	7	4	5	4	No	26
1118	PHI:4165	ALG3	Magnaporthe oryzae	reduced virulence	1	1	1	1	2	No	6
1119	PHI:6266	CptRNA-ipt	Claviceps purpurea	reduced virulence loss of pathogenicity	1	1	1	1	1	No	5
1120	PHI:6267;PHI:8120	Cpipt-log Ipt-log (cpur 04177)	Claviceps purpurea	reduced virulence loss of pathogenicity unaffected pathogenicity	1	1	1	1	1	No	5
1121	PHI:4778	Csste11	Bipolaris sorokiniana	loss of pathogenicity	2	2	1	4	1	No	10
1122	PHI:4988	Ppt1	Bipolaris maydis	reduced virulence	1	1	1	1	1	No	5
1123	PHI:9195	Cla4	Bipolaris maydis	reduced virulence	5	7	3	6	6	No	27
1124	PHI:9194	Ste20	Bipolaris maydis	unaffected pathogenicity	3	3	4	1	3	No	14
1125	PHI:8002	Slt2	Pseudocercospora fijiensis	reduced virulence	0	0	1	1	0	No	2
1126	PHI:9741	CesA3 (HpaG810051)	Hyaloperonospora arabidopsidis	reduced virulence	1	1	1	1	1	No	5
1127	PHI:6971	Cocbk1	Colletotrichum orbiculare	reduced virulence	2	1	3	1	1	No	8
1128	PHI:11249	Cdc14	Bipolaris maydis	reduced virulence	1	1	1	1	1	No	5
1129	PHI:4233	Ftr1	Bipolaris maydis	reduced virulence	1	1	1	1	1	No	5
1130	PHI:3837	Sre1	Bipolaris maydis	reduced virulence	4	0	5	4	0	No	13
1131	PHI:2336	NIA1	Parastagonospora nodorum	unaffected pathogenicity	7	6	6	5	5	No	29
1132	PHI:9094	Fe-SODB	Trypanosoma cruzi	increased virulence (hypervirulence)	1	1	0	1	0	No	3
1133	PHI:7751	Rv3114	Mycobacterium tuberculosis	reduced virulence unaffected pathogenicity	1	0	1	1	2	No	5
1134	PHI:81;PHI:6817	MAC1 Mac1	Magnaporthe oryzae	reduced virulence	13	5	10	13	9	No	50
1135	PHI:113	MPS1	Magnaporthe oryzae	loss of pathogenicity	2	2	1	1	2	No	8
1136	PHI:401	SOD2	Candida albicans	unaffected pathogenicity	2	3	3	3	1	No	12
1137	PHI:85	CLA4	Candida albicans	reduced virulence	1	1	2	1	1	No	6
1138	PHI:65	CPGB-1	Cryphonectria parasitica	reduced virulence	9	11	10	10	11	No	51
1139	PHI:2228	Odc	Ustilago maydis	loss of pathogenicity	1	1	2	2	3	No	9
1140	PHI:3146	GGT	Helicobacter pylori	unaffected pathogenicity	1	1	1	1	0	No	4
1141	PHI:121	PTH3	Magnaporthe oryzae	loss of pathogenicity	1	0	1	1	1	No	4
1142	PHI:3497;PHI:2816	Bmh1p BMH1	Candida albicans	reduced virulence lethal	1	2	0	1	1	No	5
1143	PHI:822	Ip	Zymoseptoria tritici	chemistry target: resistance to chemical	1	1	1	1	1	No	5
1144	PHI:146	CT-PKAC	Colletotrichum trifolii	loss of pathogenicity	1	3	3	1	2	No	10
1145	PHI:270	RHO1	Candida albicans	loss of pathogenicity	1	1	0	1	1	No	4
1146	PHI:8556	Acp1 (PA1869)	Pseudomonas aeruginosa	increased virulence (hypervirulence)	1	2	1	2	2	No	8
1147	PHI:10648	KatA	Pseudomonas aeruginosa	unaffected pathogenicity	0	1	1	1	1	No	4
1148	PHI:8627	FlhF	Campylobacter jejuni	reduced virulence	2	2	2	2	2	No	10
1149	PHI:158	UKC1	Ustilago maydis	reduced virulence	3	2	4	4	5	No	18
1150	PHI:1030	BcatrA	Botrytis cinerea	unaffected pathogenicity	14	8	7	6	5	No	40
1151	PHI:3411	BscN	Bordetella bronchiseptica	reduced virulence	0	2	1	1	1	No	5
1152	PHI:233;PHI:6810	TOXE	Bipolaris zeicola	reduced virulence loss of pathogenicity	1	2	1	1	0	No	5
1153	PHI:159	URA5	Histoplasma capsulatum	loss of pathogenicity	1	1	0	1	0	No	3
1154	PHI:2312;PHI:2844	THR BRM2	Metarhizium anisopliae Alternaria alternata	increased virulence (hypervirulence) unaffected pathogenicity	4	3	2	5	3	No	17
1155	PHI:174	GNA1	Candida albicans	reduced virulence	1	1	0	1	1	No	4
1156	PHI:243	CHIP6	Colletotrichum gloeosporioides	reduced virulence	2	2	1	1	3	No	9
1157	PHI:197	ALO1	Candida albicans	reduced virulence	3	3	3	2	3	No	14
1158	PHI:9703	VMA4	Candida albicans	loss of pathogenicity	1	1	1	1	1	No	5
1159	PHI:6268;PHI:9897	LacZ	Escherichia coli	reduced virulence unaffected pathogenicity	2	2	2	1	2	No	9
1160	PHI:463	HSP90	Saccharomyces cerevisiae	increased virulence (hypervirulence)	3	3	5	5	3	No	19
1161	PHI:506	URA3	Saccharomyces cerevisiae	reduced virulence	1	1	1	1	1	No	5
1162	PHI:502	ADE4	Saccharomyces cerevisiae	reduced virulence	1	1	1	1	2	No	6
1163	PHI:504	LEU2	Saccharomyces cerevisiae	reduced virulence	1	0	1	2	0	No	4
1164	PHI:10051	GlgA	Salmonella enterica	reduced virulence	3	4	4	4	4	No	19
1165	PHI:4171	IaaH-1	Pseudomonas savastanoi	reduced virulence	3	3	3	3	2	No	14
1166	PHI:7965	SdhB	Escherichia coli	reduced virulence	1	1	1	1	1	No	5
1167	PHI:2624;PHI:6460;PHI:6586	AroA	Salmonella enterica	reduced virulence	0	1	1	1	1	No	4
1168	PHI:8652	PurN	Escherichia coli	unaffected pathogenicity reduced virulence	2	3	2	2	1	No	10
1169	PHI:7020	CpdB	Escherichia coli	reduced virulence	1	1	1	1	0	No	4
1170	PHI:7662	PyrE	Salmonella enterica	reduced virulence unaffected pathogenicity	1	1	1	1	1	No	5
1171	PHI:9153	SpeE	Escherichia coli	unaffected pathogenicity	1	0	0	1	1	No	3
1172	PHI:6904	GAPDH	Staphylococcus aureus	reduced virulence	2	1	2	2	2	No	9
1173	PHI:4579	MsrA1	Staphylococcus aureus	reduced virulence	2	2	2	2	1	No	9
1174	PHI:4580	MsrA2	Staphylococcus aureus	unaffected pathogenicity reduced virulence	2	2	2	2	1	No	9
1175	PHI:4582	MsrB	Staphylococcus aureus	unaffected pathogenicity reduced virulence	0	1	1	1	0	No	3
1176	PHI:645;PHI:8301	InvC	Salmonella enterica	reduced virulence unaffected pathogenicity	0	0	0	1	0	No	1
1177	PHI:9923	Spa47	Shigella flexneri	reduced virulence loss of pathogenicity unaffected pathogenicity	1	1	1	1	0	No	4
1178	PHI:3040	ClpP	Salmonella enterica	reduced virulence	7	8	9	8	6	No	38
1179	PHI:5572	Cob	Salmonella enterica	unaffected pathogenicity	1	1	2	2	1	No	7
1180	PHI:4702	RecA	Streptococcus pneumoniae	reduced virulence	1	1	0	1	2	No	5
1181	PHI:7258	TrxA	Listeria monocytogenes	reduced virulence	5	4	4	8	4	No	25
1182	PHI:6269	GalK	Escherichia coli	reduced virulence	3	3	3	3	3	No	15
1183	PHI:6472	HtpG	Escherichia coli	reduced virulence	3	3	3	5	3	No	17
1184	PHI:11007	ZnuC	Escherichia coli	reduced virulence	9	8	10	10	9	No	46
1185	PHI:7262	CspC	Salmonella enterica	reduced virulence loss of pathogenicity unaffected pathogenicity	1	0	1	1	1	No	4
1186	PHI:2644	Thioredoxin 1	Salmonella enterica	reduced virulence	11	8	9	10	8	No	46
1187	PHI:9154	PotE	Escherichia coli	unaffected pathogenicity	0	0	0	1	0	No	1
1188	PHI:3597	NirC	Escherichia coli	reduced virulence	1	1	1	1	0	No	4
1189	PHI:7964	SdhA	Escherichia coli	reduced virulence	2	2	2	2	2	No	10
1190	PHI:9230	SatP	Escherichia coli	unaffected pathogenicity	5	6	5	5	4	No	25
1191	PHI:14	ADE2	Cryptococcus neoformans	reduced virulence loss of pathogenicity	1	2	1	1	1	No	6
1192	PHI:8635	ArcA/sagp	Streptococcus pyogenes	reduced virulence	1	1	1	1	1	No	5
1193	PHI:3330	Xrn1p	Cryptococcus neoformans	reduced virulence	5	5	4	3	3	No	20
1194	PHI:11100	Yst1 (CNI04050)	Cryptococcus neoformans	reduced virulence	1	1	1	1	1	No	5
1195	PHI:9136	ATG7	Cryptococcus neoformans	reduced virulence	2	3	2	1	2	No	10
1196	PHI:9138	ATG9	Cryptococcus neoformans	reduced virulence unaffected pathogenicity	1	1	1	2	1	No	6
1197	PHI:474	CNB1	Cryptococcus neoformans	loss of pathogenicity	4	4	4	6	5	No	23
1198	PHI:672	CAS1	Cryptococcus neoformans	increased virulence (hypervirulence)	0	0	0	1	1	No	2
1199	PHI:10018	Atg26 (CNAG 12261)	Cryptococcus neoformans	unaffected pathogenicity	2	2	2	1	4	No	11
1200	PHI:11073	Pol3	Cryptococcus neoformans	unaffected pathogenicity	5	5	5	4	3	No	22
1201	PHI:3489	Gmt1	Cryptococcus neoformans	loss of pathogenicity	3	3	3	3	3	No	15
1202	PHI:3490	Gmt2	Cryptococcus neoformans	loss of pathogenicity	3	3	3	2	3	No	14
1203	PHI:305	ICL1	Magnaporthe oryzae	reduced virulence	2	2	2	3	2	No	11
1204	PHI:9554	Mosar1	Magnaporthe oryzae	unaffected pathogenicity	2	3	1	1	1	No	8
1205	PHI:461	CST20	Candida albicans	reduced virulence	1	1	1	1	1	No	5
1206	PHI:9300;PHI:9365;PHI:9817	InlA InlA (lmo0433)	Listeria monocytogenes	reduced virulence	7	6	9	7	6	No	35
1207	PHI:5255	SecA2	Listeria monocytogenes	reduced virulence increased virulence (hypervirulence)	2	2	2	3	0	No	9
1208	PHI:9818	InlB (lmo0434)	Listeria monocytogenes	reduced virulence	1	0	1	1	2	No	5
1209	PHI:8030;PHI:8187;PHI:10625;PHI:11160	ERG11 Erg11 CaErg11	Candida albicans	loss of pathogenicity unaffected pathogenicity reduced virulence	1	1	1	1	1	No	5
1210	PHI:10448	AlgD	Pseudomonas aeruginosa	reduced virulence	1	1	1	1	1	No	5
1211	PHI:11265	PgtP	Salmonella enterica	reduced virulence	0	1	1	1	1	No	4
1212	PHI:10199	TreA	Escherichia coli	reduced virulence unaffected pathogenicity	1	0	1	1	0	No	3
1213	PHI:8010	FecE	Escherichia coli	reduced virulence	4	4	5	8	1	No	22
1214	PHI:7312	ScpA	Streptococcus pyogenes	unaffected pathogenicity	1	1	0	1	0	No	3
1215	PHI:6101;PHI:6824;PHI:6830	YopM	Yersinia pestis	effector (plant avirulence determinant)	1	0	1	1	0	No	3
1216	PHI:9459	AroA	Salmonella enterica	reduced virulence	0	1	1	1	1	No	4
1217	PHI:3522	PqsD	Pseudomonas aeruginosa	reduced virulence	1	1	1	1	1	No	5
1218	PHI:501	ADE2	Saccharomyces cerevisiae	reduced virulence	1	2	1	1	1	No	6
1219	PHI:9896	Prc	Escherichia coli	reduced virulence	0	0	0	1	0	No	1
1220	PHI:9264	GalE	Haemophilus influenzae	reduced virulence unaffected pathogenicity	4	5	4	5	5	No	23
1221	PHI:9227	Acs	Escherichia coli	reduced virulence unaffected pathogenicity	2	1	2	2	2	No	9
1222	PHI:4615	Pr1	Metarhizium anisopliae	unaffected pathogenicity	2	2	4	4	2	No	14
1223	PHI:10987	MoaA	Escherichia coli	unaffected pathogenicity	1	1	1	1	1	No	5
1224	PHI:143	CHT	Microdochium sorghi	unaffected pathogenicity	0	0	0	1	0	No	1
1225	PHI:8653	PurT	Escherichia coli	unaffected pathogenicity reduced virulence	2	2	2	1	1	No	8
1226	PHI:19	NMT	Cryptococcus neoformans	reduced virulence	1	1	0	1	1	No	4
1227	PHI:6330	Cpb	Leishmania mexicana	reduced virulence	6	7	9	7	6	No	35
1228	PHI:10669	NorW	Escherichia coli	unaffected pathogenicity reduced virulence	2	1	1	2	1	No	7
1229	PHI:503	COX15	Saccharomyces cerevisiae	reduced virulence	2	1	1	1	1	No	6
1230	PHI:7902	YscN	Yersinia pseudotuberculosis	unaffected pathogenicity	2	4	3	3	3	No	15
1231	PHI:820	Beta-tubulin	Venturia inaequalis	chemistry target: resistance to chemical	4	4	6	4	4	No	22
1232	PHI:3085	GroEL	Porphyromonas gingivalis	increased virulence (hypervirulence)	8	10	9	8	8	No	43
1233	PHI:10299	HpHSP60	Helicobacter pylori	unaffected pathogenicity	8	11	10	9	9	No	47
1234	PHI:4987	HEX1	Candida albicans	reduced virulence	1	1	1	1	0	No	4
1235	PHI:125	SAP4	Candida albicans	reduced virulence	0	1	1	1	0	No	3
1236	PHI:127	SAP6	Candida albicans	reduced virulence	1	1	0	1	0	No	3
1237	PHI:392	CaMNT2	Candida albicans	reduced virulence	2	2	2	1	5	No	12
1238	PHI:22	UAC1	Ustilago maydis	loss of pathogenicity	12	12	10	16	13	No	63
1239	PHI:219	LIG4	Candida albicans	reduced virulence	2	2	2	2	1	No	9
1240	PHI:7073	Snf1	Candida albicans	lethal	5	5	5	7	6	No	28
1241	PHI:823	Beta-tubulin	Rhynchosporium commune	chemistry target: resistance to chemical	4	4	7	4	4	No	23
1242	PHI:2117	SPM1	Magnaporthe oryzae	reduced virulence	1	1	1	1	1	No	5
1243	PHI:4961	RsmH	Staphylococcus aureus	reduced virulence	1	1	1	1	1	No	5
1244	PHI:3005	ClpP	Staphylococcus aureus	reduced virulence	7	8	9	8	6	No	38
1245	PHI:6420	EF-P	Salmonella enterica	increased virulence (hypervirulence)	2	3	2	2	1	No	10
1246	PHI:3474	ArcB	Streptococcus pneumoniae	reduced virulence	2	2	2	2	2	No	10
1247	PHI:2625;PHI:9416	PurA	Salmonella enterica	reduced virulence loss of pathogenicity	1	1	1	1	1	No	5
1248	PHI:3154	Spr0084	Streptococcus pneumoniae	reduced virulence	1	1	1	1	1	No	5
1249	PHI:9992	LsrA	Escherichia coli	reduced virulence	2	0	1	1	1	No	5
1250	PHI:9990	LsrK	Escherichia coli	reduced virulence	2	2	3	2	1	No	10
1251	PHI:8970;PHI:10643	Cahxk2 Hxk2	Candida albicans	reduced virulence unaffected pathogenicity	1	1	1	1	2	No	6
1252	PHI:8716	KRE6	Candida albicans	unaffected pathogenicity loss of pathogenicity	1	1	1	1	0	No	4
1253	PHI:8715	SKN1	Candida albicans	reduced virulence unaffected pathogenicity loss of pathogenicity	1	1	1	1	0	No	4
1254	PHI:59	THR1	Colletotrichum lagenaria	reduced virulence	3	4	4	7	4	No	22
1255	PHI:109	CLK1	Colletotrichum lindemuthianum	reduced virulence	1	1	1	2	1	No	6
1256	PHI:3629	Rv0392c	Mycobacterium tuberculosis	unaffected pathogenicity	2	2	1	2	2	No	9
1257	PHI:7584	Rv1093 (glyA1)	Mycobacterium tuberculosis	increased virulence (hypervirulence)	2	2	3	3	3	No	13
1258	PHI:7582	Rv0462 (lpdC)	Mycobacterium tuberculosis	increased virulence (hypervirulence)	4	5	4	4	2	No	19
1259	PHI:3624	PknH	Mycobacterium tuberculosis	increased virulence (hypervirulence)	0	0	0	1	1	No	2
1260	PHI:7748	Rv3111	Mycobacterium tuberculosis	reduced virulence unaffected pathogenicity	1	0	1	1	1	No	4
1261	PHI:7746	Rv3109	Mycobacterium tuberculosis	reduced virulence unaffected pathogenicity	1	1	1	1	1	No	5
1262	PHI:7586	Rv1837c (glcB)	Mycobacterium tuberculosis	increased virulence (hypervirulence)	1	1	0	1	1	No	4
1263	PHI:10877	Rv2577	Mycobacterium tuberculosis	reduced virulence	2	3	3	6	5	No	19
1264	PHI:4496	HspX	Mycobacterium tuberculosis	increased virulence (hypervirulence)	0	0	0	1	1	No	2
1265	PHI:6731	GlgC	Mycobacterium tuberculosis	reduced virulence	3	3	3	4	4	No	17
1266	PHI:3627	Rv2924c	Mycobacterium tuberculosis	unaffected pathogenicity	0	1	1	1	0	No	3
1267	PHI:9919	ClpB	Mycobacterium tuberculosis	reduced virulence	2	3	5	3	3	No	16
1268	PHI:6732	TreS	Mycobacterium tuberculosis	reduced virulence unaffected pathogenicity	2	2	1	1	0	No	6
1269	PHI:4196	KasB	Mycobacterium tuberculosis	reduced virulence	3	3	3	3	3	No	15
1270	PHI:9596	Rv1273c	Mycolicibacterium smegmatis	increased virulence (hypervirulence)	12	15	9	8	7	No	51
1271	PHI:7768	NorA (AflE)	Aspergillus flavus	reduced virulence	4	3	4	4	4	No	19
1272	PHI:1032	Bmp3	Botrytis cinerea	reduced virulence	0	0	0	1	0	No	1
1273	PHI:104	CaMNT1	Candida albicans	reduced virulence	2	2	2	1	5	No	12
1274	PHI:80	TOP1	Candida albicans	reduced virulence	2	2	3	1	1	No	9
1275	PHI:47	CAP64	Cryptococcus neoformans	loss of pathogenicity	0	0	0	1	3	No	4
1276	PHI:1082;PHI:2271	CpkA	Parastagonospora nodorum	reduced virulence unaffected pathogenicity	3	3	1	5	3	No	15
1277	PHI:36	CPKA	Magnaporthe oryzae	loss of pathogenicity	3	3	3	1	1	No	11
1278	PHI:2746	TreZ	Pseudomonas aeruginosa	reduced virulence unaffected pathogenicity	3	4	3	3	3	No	16
1279	PHI:3243	LsfA	Pseudomonas aeruginosa	reduced virulence	2	3	2	3	2	No	12
1280	PHI:3915	SuhB	Pseudomonas aeruginosa	loss of pathogenicity	3	3	4	3	4	No	17
1281	PHI:10647	YbeY (PA14 12310)	Pseudomonas aeruginosa	reduced virulence unaffected pathogenicity	1	1	1	1	1	No	5
1282	PHI:3898	HtrA	Streptococcus pneumoniae	reduced virulence	2	2	2	2	1	No	9
1283	PHI:3913	SpMsrAB2	Streptococcus pneumoniae	reduced virulence	2	3	3	3	1	No	12
1284	PHI:3899	PrtA	Streptococcus pneumoniae	unaffected pathogenicity	1	1	1	1	0	No	4
1285	PHI:4922	ArgGH	Streptococcus pneumoniae	reduced virulence	1	1	1	1	1	No	5
1286	PHI:6505	ClbA	Escherichia coli	reduced virulence	1	1	0	1	0	No	3
1287	PHI:7841	ClbD	Escherichia coli	unaffected pathogenicity	1	2	2	2	2	No	9
1288	PHI:7843	ClbF	Escherichia coli	unaffected pathogenicity	4	5	4	5	2	No	20
1289	PHI:7844	ClbG	Escherichia coli	unaffected pathogenicity	1	2	2	2	2	No	9
1290	PHI:2031	TGL3-2	Magnaporthe oryzae	unaffected pathogenicity	3	3	3	4	2	No	15
1291	PHI:598	THIOL	Leptosphaeria maculans	reduced virulence	2	2	2	2	1	No	9
1292	PHI:2255	Abd1	Parastagonospora nodorum	unaffected pathogenicity	4	3	3	2	0	No	12
1293	PHI:7568	HOG1	Parastagonospora nodorum	unaffected pathogenicity	2	2	2	2	1	No	9
1294	PHI:2256	Xdh1	Parastagonospora nodorum	unaffected pathogenicity	7	5	5	4	0	No	21
1295	PHI:1084	CpkC	Parastagonospora nodorum	reduced virulence	2	2	1	1	2	No	8
1296	PHI:2257	Pbl1	Parastagonospora nodorum	unaffected pathogenicity	1	1	1	1	1	No	5
1297	PHI:7000	ElcA	Parastagonospora nodorum	reduced virulence	0	1	1	1	1	No	4
1298	PHI:3914	Sdh1	Parastagonospora nodorum	reduced virulence	6	9	7	6	5	No	33
1299	PHI:3324	SN477	Parastagonospora nodorum	unaffected pathogenicity	0	2	1	1	0	No	4
1300	PHI:7182	Rv1988	Mycobacterium tuberculosis	reduced virulence	1	1	2	1	2	No	7
1301	PHI:685;PHI:2022	BUF BUF1	Magnaporthe oryzae	loss of pathogenicity	5	6	5	10	4	No	30
1302	PHI:650	TPS1	Botrytis cinerea	unaffected pathogenicity	2	2	3	1	3	No	11
1303	PHI:4637	CD3284	Clostridioides difficile	increased virulence (hypervirulence)	2	2	3	3	1	No	11
1304	PHI:826	SE	Trichophyton rubrum	chemistry target: resistance to chemical	1	1	1	1	2	No	6
1305	PHI:6969	Cokel2	Colletotrichum orbiculare	reduced virulence	8	8	4	7	4	No	31
1306	PHI:1058	MoSNF1	Magnaporthe oryzae	reduced virulence	4	7	7	9	11	No	38
1307	PHI:9800	CzcD	Streptococcus pyogenes	reduced virulence unaffected pathogenicity	1	1	1	1	1	No	5
1308	PHI:4652	MntE	Streptococcus pyogenes	unaffected pathogenicity	3	4	3	3	2	No	15
1309	PHI:3102	BCKDH	Toxoplasma gondii	reduced virulence	3	3	3	3	1	No	13
1310	PHI:595;PHI:2248	ALS1 Als1	Parastagonospora nodorum	reduced virulence loss of pathogenicity	3	3	3	3	3	No	15
1311	PHI:830	ERGA	Aspergillus nidulans	chemistry target: resistance to chemical	1	1	1	1	1	No	5
1312	PHI:7345	PurB	Staphylococcus aureus	reduced virulence	2	1	2	2	2	No	9
1313	PHI:7353	OdhB	Staphylococcus aureus	unaffected pathogenicity	6	7	8	7	6	No	34
1314	PHI:2632	ArgH	Staphylococcus aureus	reduced virulence	1	1	1	2	2	No	7
1315	PHI:3348	Nfu	Staphylococcus aureus	reduced virulence	2	3	2	2	2	No	11
1316	PHI:9458	LipA (SAUSA300 0829)	Staphylococcus aureus	reduced virulence	2	2	2	2	1	No	9
1317	PHI:2633	ArgB	Staphylococcus aureus	unaffected pathogenicity	1	1	1	1	1	No	5
1318	PHI:10470	ArcA	Staphylococcus aureus	unaffected pathogenicity	1	1	1	1	1	No	5
1319	PHI:10773	AtpA	Staphylococcus aureus	reduced virulence	1	1	1	1	1	No	5
1320	PHI:9450;PHI:9760	PstB	Staphylococcus aureus	unaffected pathogenicity reduced virulence	0	0	0	2	0	No	2
1321	PHI:7915	FabI	Staphylococcus aureus	reduced virulence unaffected pathogenicity	1	1	1	1	1	No	5
1322	PHI:8542	OadD	Enterococcus faecalis	reduced virulence	2	1	1	1	1	No	6
1323	PHI:2616	InlA	Listeria monocytogenes	unaffected pathogenicity	6	5	11	6	6	No	34
1324	PHI:548;PHI:2305	BcPIC5 BcFKBP12	Botrytis cinerea	reduced virulence unaffected pathogenicity increased virulence (hypervirulence)	4	5	4	4	4	No	21
1325	PHI:1063	MNH6	Magnaporthe oryzae	reduced virulence	3	3	3	2	1	No	12
1326	PHI:6888	BTH II0311	Burkholderia thailandensis	reduced virulence	3	3	3	2	3	No	14
1327	PHI:6887	BTH II0309	Burkholderia thailandensis	reduced virulence	3	3	3	2	3	No	14
1328	PHI:731;PHI:2345	FSR1	Fusarium fujikuroi Fusarium verticillioides	loss of pathogenicity	0	0	1	1	2	No	4
1329	PHI:862	ClaSSD1	Colletotrichum lagenaria	loss of pathogenicity	3	3	3	3	3	No	15
1330	PHI:3306	LovhK	Brucella abortus	loss of pathogenicity	0	0	0	1	0	No	1
1331	PHI:8922	Lon	Brucella abortus	unaffected pathogenicity reduced virulence	4	4	4	4	4	No	20
1332	PHI:9134	Bab1 1070	Brucella abortus	unaffected pathogenicity	3	2	3	2	4	No	14
1333	PHI:9125	YbeY (bab1 2156)	Brucella abortus	reduced virulence	1	1	1	1	1	No	5
1334	PHI:6684;PHI:9762	Pyk PykM (BAB1 1761)	Brucella abortus Brucella melitensis	reduced virulence	3	5	5	5	5	No	23
1335	PHI:673	Can1	Cryptococcus neoformans	unaffected pathogenicity	0	1	1	1	1	No	4
1336	PHI:2269	Mdh1	Parastagonospora nodorum	unaffected pathogenicity	2	1	2	3	2	No	10
1337	PHI:2688	XopL	Xanthomonas campestris	unaffected pathogenicity	2	2	1	2	0	No	7
1338	PHI:674	Can2	Cryptococcus neoformans	increased virulence (hypervirulence) unaffected pathogenicity	0	1	1	1	1	No	4
1339	PHI:10842	RSp0930	Ralstonia solanacearum	effector (plant avirulence determinant)	2	2	2	2	2	No	10
1340	PHI:10835	RSp0028	Ralstonia solanacearum	effector (plant avirulence determinant)	1	1	1	1	0	No	4
1341	PHI:5344	WcbM	Burkholderia pseudomallei	reduced virulence	1	1	1	1	1	No	5
1342	PHI:5192	HMPREF0351 12112 (WxL locusA)	Enterococcus faecium	reduced virulence	3	4	4	3	3	No	17
1343	PHI:7476	RomA (VK055 1984)	Klebsiella pneumoniae	unaffected pathogenicity	1	1	1	1	1	No	5
1344	PHI:2575;PHI:2596	DHOD	Trypanosoma cruzi	lethal	1	1	1	2	2	No	7
1345	PHI:1468	GzCCAAT008	Fusarium graminearum	unaffected pathogenicity	6	5	6	6	4	No	27
1346	PHI:1671	GzCCHC011	Fusarium graminearum	reduced virulence	3	5	4	3	4	No	19
1347	PHI:1525	GzHOMEL035	Fusarium graminearum	unaffected pathogenicity	1	1	0	1	0	No	3
1348	PHI:1201	(Bud32)	Fusarium graminearum	reduced virulence	0	0	1	1	1	No	3
1349	PHI:1601	GzOB042	Fusarium graminearum	unaffected pathogenicity	3	2	2	1	0	No	8
1350	PHI:1677	GzDHHC005	Fusarium graminearum	unaffected pathogenicity	2	1	2	1	1	No	7
1351	PHI:1676	GzDHHC004	Fusarium graminearum	unaffected pathogenicity	5	5	5	5	4	No	24
1352	PHI:1231;PHI:1492	FGSG 07409 GzHMG024	Fusarium graminearum	lethal unaffected pathogenicity	1	1	1	1	3	No	7
1353	PHI:6898	FgMon1	Fusarium graminearum	reduced virulence	1	2	1	1	1	No	6
1354	PHI:1675	GzDHHC003	Fusarium graminearum	unaffected pathogenicity	13	20	15	14	10	No	72
1355	PHI:1674	GzDHHC002	Fusarium graminearum	unaffected pathogenicity	4	4	5	5	3	No	21
1356	PHI:1224	FGSG 05519	Fusarium graminearum	lethal	4	4	4	4	6	No	22
1357	PHI:9145	FgAP2mu (FGSG 05093)	Fusarium graminearum	reduced virulence	3	3	3	3	3	No	15
1358	PHI:1637	GzWing009	Fusarium graminearum	lethal	1	2	2	3	2	No	10
1359	PHI:1673	GzDHHC001	Fusarium graminearum	unaffected pathogenicity	3	3	3	4	3	No	16
1360	PHI:10451	FPX1 (FGSG 01245)	Fusarium graminearum	unaffected pathogenicity	2	1	2	2	1	No	8
1361	PHI:1564	GzOB004	Fusarium graminearum	unaffected pathogenicity	1	1	1	1	1	No	5
1362	PHI:1618	GzFET5	Fusarium graminearum	unaffected pathogenicity	2	2	3	3	3	No	13
1363	PHI:1470	GzHMG002	Fusarium graminearum	reduced virulence	2	2	2	3	1	No	10
1364	PHI:1608	GzP53L001	Fusarium graminearum	unaffected pathogenicity	1	1	1	1	1	No	5
1365	PHI:825	SE	Trichophyton rubrum	chemistry target: resistance to chemical	1	1	1	1	2	No	6
1366	PHI:2498	Atg1	Ustilago maydis	reduced virulence loss of pathogenicity	1	1	3	1	1	No	7
1367	PHI:2239	Spe-Sdh	Ustilago maydis	reduced virulence	1	0	0	1	1	No	3
1368	PHI:382;PHI:2233	SMU1 Smu1	Ustilago maydis	reduced virulence	5	7	6	3	4	No	25
1369	PHI:854	Um01947	Ustilago maydis	reduced virulence	2	1	2	2	1	No	8
1370	PHI:5554	LmABCB3	Leishmania major	reduced virulence	7	7	5	12	15	No	46
1371	PHI:8634	SODB1 (XM 001685449)	Leishmania major	reduced virulence	1	1	0	3	2	No	7
1372	PHI:3459	NTPDase1	Leishmania major	reduced virulence	2	3	0	1	2	No	8
1373	PHI:3258	C14DM	Leishmania major	reduced virulence	3	3	2	3	1	No	12
1374	PHI:3460	NTPDase2	Leishmania major	unaffected pathogenicity	2	3	0	1	2	No	8
1375	PHI:11218	PRMT7	Leishmania major	increased virulence (hypervirulence) reduced virulence	2	2	2	2	2	No	10
1376	PHI:524	CLN1	Ustilago maydis	unaffected pathogenicity loss of pathogenicity	2	2	2	2	2	No	10
1377	PHI:3957	XC 3615	Xanthomonas campestris	reduced virulence	1	1	1	1	1	No	5
1378	PHI:3954	XC 3287	Xanthomonas campestris	reduced virulence	0	0	1	1	0	No	2
1379	PHI:3953	XC 2359	Xanthomonas campestris	reduced virulence	2	3	2	2	1	No	10
1380	PHI:3945	XC 2203	Xanthomonas campestris	reduced virulence	1	2	2	2	2	No	9
1381	PHI:3944	XC 1876	Xanthomonas campestris	reduced virulence	1	1	1	1	1	No	5
1382	PHI:3966	XC 1565	Xanthomonas campestris	reduced virulence	1	1	1	1	1	No	5
1383	PHI:3943	XC 0979	Xanthomonas campestris	reduced virulence	1	2	2	2	1	No	8
1384	PHI:3950	XC 0892	Xanthomonas campestris	reduced virulence	5	5	4	5	4	No	23
1385	PHI:3963	XC 0646	Xanthomonas campestris	reduced virulence	2	2	2	2	2	No	10
1386	PHI:3942	XC 0509	Xanthomonas campestris	reduced virulence	1	1	1	1	1	No	5
1387	PHI:3959	XC 0501	Xanthomonas campestris	reduced virulence	1	1	1	1	1	No	5
1388	PHI:3941	XC 0481	Xanthomonas campestris	reduced virulence	4	4	3	4	2	No	17
1389	PHI:3948	XC 0450	Xanthomonas campestris	reduced virulence	1	2	1	1	0	No	5
1390	PHI:3958	XC 0423	Xanthomonas campestris	reduced virulence	3	4	3	3	3	No	16
1391	PHI:3947	XC 0281	Xanthomonas campestris	reduced virulence	10	9	8	5	7	No	39
1392	PHI:6557	CysB	Aspergillus fumigatus	unaffected pathogenicity reduced virulence	3	4	4	4	3	No	18
1393	PHI:2529	ERG10	Aspergillus fumigatus	lethal	2	2	2	2	2	No	10
1394	PHI:6476	Gin4	Aspergillus fumigatus	reduced virulence	1	1	1	1	1	No	5
1395	PHI:10527	GNA1	Aspergillus fumigatus	loss of pathogenicity	1	1	0	1	1	No	4
1396	PHI:2969	ArgEF	Aspergillus fumigatus	reduced virulence	3	3	3	3	2	No	14
1397	PHI:2516;PHI:6441	HIS3 HisB	Aspergillus fumigatus	lethal reduced virulence	1	0	1	1	1	No	4
1398	PHI:2525	TOM40	Aspergillus fumigatus	lethal	1	2	1	1	1	No	6
1399	PHI:6475	ParA	Aspergillus fumigatus	unaffected pathogenicity	1	1	1	1	1	No	5
1400	PHI:4894	AspC	Aspergillus fumigatus	unaffected pathogenicity increased virulence (hypervirulence)	1	1	1	1	1	No	5
1401	PHI:2521	GUS1	Aspergillus fumigatus	lethal	3	3	3	2	3	No	14
1402	PHI:2522	SPE2	Aspergillus fumigatus	lethal	1	1	1	1	1	No	5
1403	PHI:2550	NOB1	Aspergillus fumigatus	lethal	2	2	2	2	2	No	10
1404	PHI:9541	CysD	Aspergillus fumigatus	unaffected pathogenicity	0	0	0	1	2	No	3
1405	PHI:2322	SidH	Aspergillus fumigatus	reduced virulence	4	4	2	5	3	No	18
1406	PHI:4893	AspB	Aspergillus fumigatus	unaffected pathogenicity increased virulence (hypervirulence)	1	1	1	1	1	No	5
1407	PHI:2541	OLE1	Aspergillus fumigatus	lethal	0	0	0	1	0	No	1
1408	PHI:10337	PmrA (Afu2g05860)	Aspergillus fumigatus	unaffected pathogenicity reduced virulence	2	2	1	2	1	No	8
1409	PHI:2547	ESF1	Aspergillus fumigatus	lethal	1	1	2	1	2	No	7
1410	PHI:9899	RpdA (Afu2g03390)	Aspergillus fumigatus	loss of pathogenicity	4	2	3	3	3	No	15
1411	PHI:3277	GnoA	Aspergillus fumigatus	unaffected pathogenicity	1	1	1	1	1	No	5
1412	PHI:2539	CDS1	Aspergillus fumigatus	lethal	1	1	1	1	1	No	5
1413	PHI:7654	AroB	Aspergillus fumigatus	reduced virulence	1	1	2	1	1	No	6
1414	PHI:10910	GprJ (Afu1g06840)	Aspergillus fumigatus	reduced virulence	1	1	1	2	2	No	7
1415	PHI:6670	SchA	Aspergillus fumigatus	loss of pathogenicity	0	0	0	2	1	No	3
1416	PHI:6752	GrrA	Aspergillus fumigatus	unaffected pathogenicity	8	7	4	7	2	No	28
1417	PHI:6554	SB	Aspergillus fumigatus	unaffected pathogenicity	2	2	2	2	1	No	9
1418	PHI:6753	GlcA	Aspergillus fumigatus	lethal	4	4	4	5	4	No	21
1419	PHI:6443	HapC	Aspergillus fumigatus	reduced virulence	3	3	1	3	0	No	10
1420	PHI:2639	Ilv3B	Aspergillus fumigatus	unaffected pathogenicity reduced virulence	1	1	1	1	1	No	5
1421	PHI:2530	TUB1	Aspergillus fumigatus	lethal loss of pathogenicity	1	1	2	1	1	No	6
1422	PHI:2546	BRX1	Aspergillus fumigatus	lethal	1	1	1	1	1	No	5
1423	PHI:7653	TrpA	Aspergillus fumigatus	reduced virulence	2	2	3	2	2	No	11
1424	PHI:2543	GCD6	Aspergillus fumigatus	lethal loss of pathogenicity	3	3	2	4	2	No	14
1425	PHI:2533	FKS1	Aspergillus fumigatus	lethal	1	2	2	1	0	No	6
1426	PHI:10461	FmqA	Aspergillus fumigatus	reduced virulence	0	0	0	1	0	No	1
1427	PHI:2526	LUC7	Aspergillus fumigatus	lethal	1	1	1	1	1	No	5
1428	PHI:2549	MAK5	Aspergillus fumigatus	lethal	3	5	2	4	10	No	24
1429	PHI:10338	SrcA (Afu6g06740)	Aspergillus fumigatus	unaffected pathogenicity reduced virulence	3	3	3	4	3	No	16
1430	PHI:9276	Cdc43	Aspergillus fumigatus	unaffected pathogenicity	2	3	1	2	1	No	9
1431	PHI:2534	ERG11A	Aspergillus fumigatus	lethal unaffected pathogenicity loss of pathogenicity	0	0	0	1	1	No	2
1432	PHI:2970;PHI:10406	ArgB ArgB (AFUA 4G07190)	Aspergillus fumigatus	unaffected pathogenicity reduced virulence	2	2	2	2	2	No	10
1433	PHI:11012	MetH (AFUA 4G07360)	Aspergillus fumigatus	reduced virulence	2	1	0	1	1	No	5
1434	PHI:6146	HorA	Aspergillus fumigatus	reduced virulence	1	1	0	1	0	No	3
1435	PHI:7457	RamA	Aspergillus fumigatus	reduced virulence	3	3	2	3	3	No	14
1436	PHI:6751	Fbx23	Aspergillus fumigatus	increased virulence (hypervirulence)	2	2	3	1	5	No	13
1437	PHI:9203	GcnE (AFUA 4g12650)	Aspergillus fumigatus	unaffected pathogenicity	5	5	4	5	7	No	26
1438	PHI:2321	SidI	Aspergillus fumigatus	reduced virulence	4	4	5	6	4	No	23
1439	PHI:8521	Kin1	Aspergillus fumigatus	unaffected pathogenicity	2	1	3	3	1	No	10
1440	PHI:3323	SskB	Aspergillus fumigatus	loss of pathogenicity	4	5	3	4	2	No	18
1441	PHI:4471	PtcB	Aspergillus fumigatus	loss of pathogenicity	10	13	13	14	14	No	64
1442	PHI:6926	MyoE	Aspergillus fumigatus	reduced virulence	2	3	4	3	5	No	17
1443	PHI:6474	Cla4	Aspergillus fumigatus	unaffected pathogenicity	1	2	0	1	1	No	5
1444	PHI:2532	HEM15	Aspergillus fumigatus	lethal	1	1	1	1	1	No	5
1445	PHI:10405	ArgJ (AFUA 5G08120)	Aspergillus fumigatus	reduced virulence	1	2	1	1	1	No	6
1446	PHI:362;PHI:2520	LYSF LYS4	Aspergillus fumigatus	loss of pathogenicity lethal	2	2	2	2	2	No	10
1447	PHI:6085	MpkC	Aspergillus fumigatus	reduced virulence	1	1	1	1	0	No	4
1448	PHI:3849	CnaA	Aspergillus fumigatus	reduced virulence	2	2	3	1	1	No	9
1449	PHI:7652	AroC	Aspergillus fumigatus	reduced virulence	1	1	1	1	1	No	5
1450	PHI:2518	MET16	Aspergillus fumigatus	lethal	1	1	1	2	2	No	7
1451	PHI:2540	IPP1	Aspergillus fumigatus	lethal	2	3	3	3	2	No	13
1452	PHI:2531	PRI1	Aspergillus fumigatus	lethal	1	1	1	1	1	No	5
1453	PHI:9540	CysB	Aspergillus fumigatus	unaffected pathogenicity	1	1	2	4	3	No	11
1454	PHI:7168	CrpA	Aspergillus fumigatus	reduced virulence	3	4	0	4	2	No	13
1455	PHI:2528	SLY1	Aspergillus fumigatus	lethal	3	2	2	3	2	No	12
1456	PHI:2551	NOC3	Aspergillus fumigatus	lethal	1	1	1	1	1	No	5
1457	PHI:6555	SF	Aspergillus fumigatus	unaffected pathogenicity	4	4	4	2	2	No	16
1458	PHI:4229	AbcA	Aspergillus fumigatus	unaffected pathogenicity	4	10	9	11	17	No	51
1459	PHI:2638	Ilv3A	Aspergillus fumigatus	reduced virulence	1	1	1	1	1	No	5
1460	PHI:2517	TRPS	Aspergillus fumigatus	lethal	3	3	2	2	2	No	12
1461	PHI:2527	SEC31	Aspergillus fumigatus	lethal loss of pathogenicity	5	6	7	3	5	No	26
1462	PHI:2548	KRR1	Aspergillus fumigatus	lethal	1	1	1	1	1	No	5
1463	PHI:2515	ALG7	Aspergillus fumigatus	lethal	1	1	1	1	2	No	6
1464	PHI:2545	TIF35	Aspergillus fumigatus	lethal	10	8	8	6	6	No	38
1465	PHI:2514	PFS2	Aspergillus fumigatus	lethal	10	11	10	13	11	No	55
1466	PHI:6556	MecA	Aspergillus fumigatus	unaffected pathogenicity reduced virulence	3	4	4	4	5	No	20
1467	PHI:7700	Lov	Pseudomonas syringae	unaffected pathogenicity	0	0	0	3	0	No	3
1468	PHI:3923	Cor	Mycobacterium tuberculosis	reduced virulence	1	1	0	1	0	No	3
1469	PHI:4900	Crc	Pseudomonas aeruginosa	reduced virulence	1	0	1	2	1	No	5
1470	PHI:5057;PHI:6988	PchA	Pseudomonas aeruginosa	unaffected pathogenicity loss of pathogenicity	1	1	0	1	2	No	5
1471	PHI:2071	Moatg3	Magnaporthe oryzae	loss of pathogenicity	1	1	1	1	1	No	5
1472	PHI:768;PHI:2061;PHI:2076	ATG8 Moatg8	Magnaporthe oryzae	loss of pathogenicity	0	0	0	1	1	No	2
1473	PHI:2066;PHI:2077;PHI:8264	MgAtg9 Moatg9 Atg9	Magnaporthe oryzae Fusarium graminearum	loss of pathogenicity unaffected pathogenicity	1	1	1	2	1	No	6
1474	PHI:2086;PHI:9303	Moatg24 Moatg24 (XP 003716251.1)	Magnaporthe oryzae	unaffected pathogenicity reduced virulence	1	1	1	1	2	No	6
1475	PHI:2072	Moatg4	Magnaporthe oryzae	loss of pathogenicity	1	1	1	1	1	No	5
1476	PHI:2084	Moatg18	Magnaporthe oryzae	reduced virulence	3	3	3	2	2	No	13
1477	PHI:2075	Moatg7	Magnaporthe oryzae	loss of pathogenicity	2	2	2	1	1	No	8
1478	PHI:2035;PHI:2069;PHI:8612	ATG1 Moatg1 Atg 1	Magnaporthe oryzae	loss of pathogenicity	1	1	0	1	1	No	4
1479	PHI:2991	MGG 01426.6	Magnaporthe oryzae	reduced virulence	8	9	10	8	5	No	40
1480	PHI:6324	StpC	Staphylococcus aureus	unaffected pathogenicity	2	2	2	2	2	No	10
1481	PHI:3604	SpxB	Streptococcus pneumoniae	increased virulence (hypervirulence)	1	1	1	1	2	No	6
1482	PHI:10356	Och1	Cryptococcus neoformans	unaffected pathogenicity	4	3	3	3	1	No	14
1483	PHI:6749	UGT1	Cryptococcus neoformans	loss of pathogenicity	3	4	3	3	3	No	16
1484	PHI:3724	RNase III	Salmonella enterica	reduced virulence	1	1	0	1	0	No	3
1485	PHI:497	HOG1	Cryptococcus neoformans	reduced virulence	2	0	2	1	0	No	5
1486	PHI:3821	SconCp	Paracoccidioides brasiliensis	reduced virulence	1	1	1	1	1	No	5
1487	PHI:2465	HsvB	Erwinia amylovora	reduced virulence unaffected pathogenicity	2	2	2	2	0	No	8
1488	PHI:2466	HsvC	Erwinia amylovora	reduced virulence unaffected pathogenicity	1	2	1	2	0	No	6
1489	PHI:6438	Ndk	Pseudomonas aeruginosa	increased virulence (hypervirulence)	1	2	2	2	2	No	9
1490	PHI:378	SIT4	Candida albicans	reduced virulence	5	5	5	5	5	No	25
1491	PHI:10196	Brg1	Candida albicans	increased virulence (hypervirulence)	1	1	0	1	1	No	4
1492	PHI:8897	Ept1 (C7 02690C A)	Candida albicans	increased virulence (hypervirulence) reduced virulence	0	1	1	1	1	No	4
1493	PHI:500	YHB1	Candida albicans	reduced virulence	1	1	0	1	0	No	3
1494	PHI:2558	DUR31	Candida albicans	reduced virulence	0	1	1	1	1	No	4
1495	PHI:4561;PHI:9284	Gcn5	Candida albicans	loss of pathogenicity	3	3	3	3	4	No	16
1496	PHI:8867	Vcx1	Candida albicans	unaffected pathogenicity	1	1	1	1	1	No	5
1497	PHI:11135	ARP1 (orf19.2641)	Candida albicans	reduced virulence	7	7	5	8	3	No	30
1498	PHI:477	ICL1	Candida albicans	reduced virulence	2	2	2	3	2	No	11
1499	PHI:8972;PHI:10645	Caglk4 Glk4	Candida albicans	reduced virulence unaffected pathogenicity	1	1	1	1	2	No	6
1500	PHI:8971;PHI:10644	Caglk1 Glk1	Candida albicans	reduced virulence unaffected pathogenicity	1	1	1	1	2	No	6
1501	PHI:9704	Vma10	Candida albicans	loss of pathogenicity	1	1	1	1	1	No	5
1502	PHI:5282	Hat1	Candida albicans	reduced virulence	1	1	1	1	0	No	4
1503	PHI:8029;PHI:8122;PHI:11044	ERG3 Erg3	Candida albicans	loss of pathogenicity reduced virulence unaffected pathogenicity	2	2	2	1	2	No	9
1504	PHI:262	MAD2	Candida albicans	reduced virulence	1	1	1	1	1	No	5
1505	PHI:4936	Gpx31	Candida albicans	unaffected pathogenicity	0	1	2	2	2	No	7
1506	PHI:4937	Gpx32	Candida albicans	unaffected pathogenicity	0	1	2	2	2	No	7
1507	PHI:2823	PES1	Candida albicans	reduced virulence	2	2	2	2	2	No	10
1508	PHI:5051	Pst2	Candida albicans	loss of pathogenicity	3	2	3	2	4	No	14
1509	PHI:3822	GIT3	Candida albicans	reduced virulence	0	1	1	2	1	No	5
1510	PHI:7195	Bdf1	Candida albicans	reduced virulence	7	7	6	8	6	No	34
1511	PHI:380	SKN7	Candida albicans	reduced virulence	0	0	0	1	1	No	2
1512	PHI:10653	Dfr1	Candida albicans	reduced virulence	1	1	1	1	1	No	5
1513	PHI:4891	Orf19.5352	Candida albicans	unaffected pathogenicity	2	2	2	2	2	No	10
1514	PHI:6076	RPS41	Candida albicans	reduced virulence	1	1	1	1	1	No	5
1515	PHI:7048	Oma1	Candida albicans	increased virulence (hypervirulence)	1	1	1	1	1	No	5
1516	PHI:4906	Gyp1	Candida albicans	reduced virulence	1	1	2	2	2	No	8
1517	PHI:7311	Bas1	Candida albicans	reduced virulence	14	16	15	14	10	No	69
1518	PHI:4878	Ppg1	Candida albicans	reduced virulence	5	5	6	6	5	No	27
1519	PHI:4992	Rhr2	Candida albicans	reduced virulence	1	2	0	1	0	No	4
1520	PHI:252	FKH2	Candida albicans	loss of pathogenicity	1	1	1	1	1	No	5
1521	PHI:6786;PHI:6792;PHI:6807;PHI:6814	Sap4	Candida albicans	unaffected pathogenicity reduced virulence	0	1	1	1	1	No	4
1522	PHI:4045	Nap1	Candida albicans	reduced virulence	0	1	1	1	1	No	4
1523	PHI:2825	SET1	Candida albicans	reduced virulence	6	5	4	5	5	No	25
1524	PHI:6788;PHI:6794;PHI:6809;PHI:6816;PHI:10193	Sap6	Candida albicans	unaffected pathogenicity reduced virulence increased virulence (hypervirulence)	0	0	0	1	0	No	1
1525	PHI:3689	Pot13p	Candida albicans	unaffected pathogenicity	2	2	2	2	2	No	10
1526	PHI:6074	Tpd3	Candida albicans	reduced virulence	1	1	1	1	2	No	6
1527	PHI:10529	Rad4	Candida albicans	unaffected pathogenicity	1	1	0	1	0	No	3
1528	PHI:8693	GLX3	Candida albicans	loss of pathogenicity	1	0	1	1	0	No	3
1529	PHI:2553	VPS4	Candida albicans	loss of pathogenicity	10	10	11	8	10	No	49
1530	PHI:2563	DPP3	Candida albicans	reduced virulence	3	3	2	3	3	No	14
1531	PHI:2557	CaSch9p	Candida albicans	reduced virulence	1	1	1	1	1	No	5
1532	PHI:8866	Pmc1	Candida albicans	reduced virulence	2	2	2	4	1	No	11
1533	PHI:3688	Fox3p	Candida albicans	unaffected pathogenicity	1	1	1	1	2	No	6
1534	PHI:3321	Tfp1	Candida albicans	loss of pathogenicity	1	1	1	1	1	No	5
1535	PHI:8741	Pah1	Candida albicans	reduced virulence	2	2	2	1	0	No	7
1536	PHI:7011	Arl1	Candida albicans	reduced virulence	8	8	8	8	7	No	39
1537	PHI:6795	CaMCA1	Candida albicans	reduced virulence	1	1	1	1	1	No	5
1538	PHI:7009	Arf2	Candida albicans	reduced virulence	8	8	8	8	7	No	39
1539	PHI:427	TPK1	Candida albicans	unaffected pathogenicity	1	3	2	3	0	No	9
1540	PHI:2565	HSF1	Candida albicans	reduced virulence	1	1	1	1	1	No	5
1541	PHI:431	BWC2	Cryptococcus neoformans	reduced virulence	2	1	1	3	2	No	9
1542	PHI:860	MSP1	Magnaporthe oryzae	reduced virulence	8	9	9	7	8	No	41
1543	PHI:7753	AnkB (XOO0418)	Xanthomonas oryzae	reduced virulence	7	9	5	3	1	No	25
1544	PHI:10348	AccD	Staphylococcus aureus	reduced virulence	1	1	1	1	0	No	4
1545	PHI:410	SOD2	Cryptococcus neoformans	loss of pathogenicity	3	4	3	3	3	No	16
1546	PHI:365;PHI:2267	MLS1 Mls1	Parastagonospora nodorum	loss of pathogenicity	2	2	2	2	2	No	10
1547	PHI:393	CpCOT1	Claviceps purpurea	loss of pathogenicity	2	3	3	1	1	No	10
1548	PHI:6297	CDC50	Cryptococcus neoformans	reduced virulence	1	1	1	1	1	No	5
1549	PHI:360	KIN1	Cryptococcus neoformans	reduced virulence	0	0	0	1	0	No	1
1550	PHI:4575	NTH2	Cryptococcus neoformans	increased virulence (hypervirulence)	2	0	2	2	0	No	6
1551	PHI:3453	Ktr3	Cryptococcus neoformans	reduced virulence	2	2	2	1	5	No	12
1552	PHI:9443	RAD23 (CNA07500)	Cryptococcus neoformans	reduced virulence unaffected pathogenicity	2	3	3	5	4	No	17
1553	PHI:7207	Msh2	Cryptococcus neoformans	unaffected pathogenicity	4	5	5	4	4	No	22
1554	PHI:4734	HemH	Francisella tularensis	unaffected pathogenicity	1	1	1	1	1	No	5
1555	PHI:7067	KdsD	Francisella tularensis	reduced virulence	1	1	1	2	1	No	6
1556	PHI:4732	FTT0673p/prsAp	Francisella tularensis	unaffected pathogenicity	1	1	2	3	2	No	9
1557	PHI:6153	FeoB	Francisella tularensis	loss of pathogenicity	0	0	0	2	0	No	2
1558	PHI:324	ACA1	Cryptococcus neoformans	loss of pathogenicity	1	1	1	1	1	No	5
1559	PHI:2846	TRR1	Cryptococcus neoformans	lethal	2	2	1	3	2	No	10
1560	PHI:3717;PHI:6717	TgMAPK1 Mapk1	Toxoplasma gondii	reduced virulence	1	1	1	1	1	No	5
1561	PHI:2347	PGIP2	Botrytis cinerea	effector (plant avirulence determinant)	9	6	7	13	4	No	39
1562	PHI:9873	RalF	Legionella pneumophila	unaffected pathogenicity	3	3	2	3	3	No	14
1563	PHI:4975	LssB	Legionella pneumophila	reduced virulence	2	3	5	11	2	No	23
1564	PHI:538	FRT1	Botrytis cinerea	unaffected pathogenicity	6	8	5	11	8	No	38
1565	PHI:9872	MitF/ LegG1 (Lpg1976)	Legionella pneumophila	effector (plant avirulence determinant)	4	1	3	1	0	No	9
1566	PHI:6609	ClpP	Legionella pneumophila	reduced virulence	7	8	9	8	6	No	38
1567	PHI:6381	IolT	Legionella pneumophila	reduced virulence	6	9	6	13	9	No	43
1568	PHI:6382	IolG	Legionella pneumophila	reduced virulence	0	0	0	1	0	No	1
1569	PHI:6520	LpdA	Legionella pneumophila	effector (plant avirulence determinant)	4	5	4	4	2	No	19
1570	PHI:7386	CadA	Listeria monocytogenes	unaffected pathogenicity reduced virulence	1	2	2	1	0	No	6
1571	PHI:6886	BPSS2025	Burkholderia pseudomallei	reduced virulence	2	2	2	2	3	No	11
1572	PHI:6885	BPSS2021	Burkholderia pseudomallei	reduced virulence	2	2	2	2	3	No	11
1573	PHI:7014	GlbC	Burkholderia pseudomallei	increased virulence (hypervirulence)	0	0	1	2	0	No	3
1574	PHI:10712	BPSL2748	Burkholderia pseudomallei	unaffected pathogenicity	3	4	3	3	3	No	16
1575	PHI:10934	Plc2 (bpsl0337)	Burkholderia pseudomallei	reduced virulence unaffected pathogenicity	1	1	3	3	2	No	10
1576	PHI:7573	MgtB	Yersinia pseudotuberculosis	reduced virulence	1	1	1	1	1	No	5
1577	PHI:3134	PykF	Yersinia pseudotuberculosis	reduced virulence	3	5	5	5	5	No	23
1578	PHI:7909	HmuV	Yersinia pseudotuberculosis	unaffected pathogenicity	5	4	3	2	6	No	20
1579	PHI:414	GOX1	Parastagonospora nodorum	unaffected pathogenicity	4	4	3	2	2	No	15
1580	PHI:367	MRB1	Ustilago maydis	reduced virulence	1	1	1	1	1	No	5
1581	PHI:2694	RsmB	Pectobacterium atrosepticum	loss of pathogenicity reduced virulence	4	4	4	4	1	No	17
1582	PHI:11150	Edd	Pectobacterium atrosepticum	unaffected pathogenicity	1	1	1	1	1	No	5
1583	PHI:2560	CNB1	Candida glabrata	reduced virulence	2	2	2	2	3	No	11
1584	PHI:2570	CYB2	Candida glabrata	reduced virulence	4	4	4	3	4	No	19
1585	PHI:9274	Cgfab1	Candida glabrata	reduced virulence	7	8	3	7	6	No	31
1586	PHI:9500	ADA2 (CAGL0K06193g)	Candida glabrata	increased virulence (hypervirulence)	2	2	2	2	2	No	10
1587	PHI:4626	CgSlt2	Candida glabrata	unaffected pathogenicity	2	1	2	2	0	No	7
1588	PHI:8917	ICL1	Candida glabrata	unaffected pathogenicity reduced virulence	2	2	2	2	2	No	10
1589	PHI:6468	Cgulp2	Candida glabrata	reduced virulence	0	0	0	1	0	No	1
1590	PHI:9273	Cgvac14 (CAGL0H06501g)	Candida glabrata	reduced virulence unaffected pathogenicity	2	2	2	1	2	No	9
1591	PHI:3287	CgVps34	Candida glabrata	reduced virulence	5	4	5	5	6	No	25
1592	PHI:2691	IRE1	Candida glabrata	reduced virulence	2	2	2	1	1	No	8
1593	PHI:9271	Cgfig4 (CAGL0D02464g)	Candida glabrata	unaffected pathogenicity reduced virulence	3	3	3	3	2	No	14
1594	PHI:10553	PurK	Staphylococcus aureus	reduced virulence	2	3	2	2	1	No	10
1595	PHI:528	CLA4	Ustilago maydis	loss of pathogenicity	6	10	6	5	2	No	29
1596	PHI:3909	ZrfB	Aspergillus fumigatus	reduced virulence loss of pathogenicity	1	1	1	1	1	No	5
1597	PHI:3908	ZrfA	Aspergillus fumigatus	reduced virulence loss of pathogenicity	2	2	2	1	2	No	9
1598	PHI:7747	Rv3110	Mycobacterium tuberculosis	reduced virulence unaffected pathogenicity	2	2	2	1	1	No	8
1599	PHI:11202	Rnj (DIP1463)	Corynebacterium diphtheriae	reduced virulence	2	2	2	2	1	No	9
1600	PHI:2510	MsdS/AfmsdC	Aspergillus fumigatus	unaffected pathogenicity	3	2	2	2	4	No	13
1601	PHI:2306	ClxA	Aspergillus fumigatus	unaffected pathogenicity	1	1	1	1	1	No	5
1602	PHI:2382	Upa2	Ustilago maydis	unaffected pathogenicity	5	6	5	5	5	No	26
1603	PHI:828;PHI:829	ERG1 (ERGA)	Aspergillus fumigatus	chemistry target: resistance to chemical	1	1	1	1	1	No	5
1604	PHI:2425	PKS2	Bipolaris maydis	reduced virulence	1	0	0	1	1	No	3
1605	PHI:5279	Bcpks13	Botrytis cinerea	unaffected pathogenicity	1	2	1	1	2	No	7
1606	PHI:384	SPE3-LYS9	Cryptococcus neoformans	loss of pathogenicity	1	0	0	1	1	No	3
1607	PHI:7701	Pb14-3-3	Paracoccidioides brasiliensis	reduced virulence	1	2	0	1	1	No	5
1608	PHI:358	ILV2	Cryptococcus neoformans	loss of pathogenicity	4	2	6	3	3	No	18
1609	PHI:420	SOD2	Cryptococcus gattii vgiii	loss of pathogenicity	2	3	3	3	3	No	14
1610	PHI:432;PHI:4212;PHI:4242	FGL1 Fgl1	Fusarium graminearum	reduced virulence	8	8	6	6	5	No	33
1611	PHI:338	CLB2	Ustilago maydis	reduced virulence	2	2	3	4	3	No	14
1612	PHI:668	GNO1	Cryptococcus neoformans	unaffected pathogenicity reduced virulence	1	1	1	2	3	No	8
1613	PHI:1085	Ptr2	Parastagonospora nodorum	unaffected pathogenicity	2	2	1	4	3	No	12
1614	PHI:526;PHI:1071	GAS1 Gas1	Ustilago maydis	reduced virulence loss of pathogenicity	2	2	3	2	3	No	12
1615	PHI:10728	MenD	Listeria monocytogenes	reduced virulence	0	0	0	1	0	No	1
1616	PHI:9501	AguB (LMOf2365 0045)	Listeria monocytogenes	reduced virulence	2	2	2	2	2	No	10
1617	PHI:332	CAC1	Colletotrichum lagenaria	loss of pathogenicity	2	6	4	9	1	No	22
1618	PHI:341	CPK1	Colletotrichum lagenaria	loss of pathogenicity	1	3	1	2	3	No	10
1619	PHI:849	GyrA	Burkholderia glumae	chemistry target: resistance to chemical chemistry target: sensitivity to chemical	2	2	3	3	2	No	12
1620	PHI:850	GyrA	Burkholderia glumae	chemistry target: resistance to chemical chemistry target: sensitivity to chemical	2	2	3	1	2	No	10
1621	PHI:851	GyrA	Burkholderia glumae	chemistry target: resistance to chemical chemistry target: sensitivity to chemical	2	2	3	1	2	No	10
1622	PHI:852	GyrA	Burkholderia glumae	chemistry target: resistance to chemical chemistry target: sensitivity to chemical	2	2	3	3	2	No	12
1623	PHI:824;PHI:6838	GyrA	Burkholderia glumae	chemistry target: sensitivity to chemical chemistry target: resistance to chemical reduced virulence loss of pathogenicity	2	2	3	3	2	No	12
1624	PHI:5079	Lmp1	Borreliella burgdorferi	reduced virulence	0	0	3	3	1	No	7
1625	PHI:274	USX1	Cryptococcus neoformans	loss of pathogenicity	3	4	4	6	6	No	23
1626	PHI:10567	Beta2-tubulin	Blumeria graminis	reduced virulence	4	4	7	4	4	No	23
1627	PHI:10171	GroEL	Mycoplasma gallisepticum	increased virulence (hypervirulence)	9	13	10	8	10	No	50
1628	PHI:9164	PG RS04465 (PG1010)	Porphyromonas gingivalis	reduced virulence	0	0	0	1	0	No	1
1629	PHI:7938	PG0343	Porphyromonas gingivalis	reduced virulence	3	2	3	3	5	No	16
1630	PHI:11120	RplN	Bordetella pertussis	unaffected pathogenicity increased virulence (hypervirulence)	1	2	1	2	2	No	8
1631	PHI:2589	TcGALE	Trypanosoma cruzi	lethal	1	1	1	1	1	No	5
1632	PHI:821	Tub2	Monilinia fructicola	chemistry target: resistance to chemical	3	3	7	3	3	No	19
1633	PHI:10566	Beta2-tubulin	Blumeria graminis	reduced virulence	4	4	7	4	4	No	23
1634	PHI:419	CSH1	Candida albicans	reduced virulence	4	2	4	4	3	No	17
1635	PHI:518	MST20	Magnaporthe oryzae	unaffected pathogenicity	0	0	2	2	0	No	4
1636	PHI:296	CZK3	Cercospora zeae-maydis	reduced virulence	2	1	1	2	0	No	6
1637	PHI:386	TSA1	Cryptococcus neoformans	reduced virulence	3	4	3	3	3	No	16
1638	PHI:9969	SodA2	Bacillus cereus	reduced virulence	3	4	3	3	3	No	16
1639	PHI:6483	Mfd	Bacillus cereus	loss of pathogenicity	1	1	1	1	2	No	6
1640	PHI:9968	SodA1	Bacillus cereus	reduced virulence	3	4	3	4	3	No	17
1641	PHI:4127	BgsB	Enterococcus faecalis	reduced virulence	2	2	2	1	2	No	9
1642	PHI:8543	AlsS	Enterococcus faecalis	reduced virulence	3	2	2	3	2	No	12
1643	PHI:7056	RnjB	Enterococcus faecalis	reduced virulence	1	1	1	1	0	No	4
1644	PHI:4140	Ldh-2	Enterococcus faecalis	unaffected pathogenicity reduced virulence	3	3	3	3	4	No	16
1645	PHI:4139	Ldh-1	Enterococcus faecalis	unaffected pathogenicity reduced virulence	4	4	3	4	4	No	19
1646	PHI:9510	CBU 0347	Coxiella burnetii	unaffected pathogenicity	5	8	6	12	11	No	42
1647	PHI:8507	NadB	Coxiella burnetii	reduced virulence	2	2	2	2	2	No	10
1648	PHI:261	ICL1	Leptosphaeria maculans	reduced virulence	2	2	2	3	2	No	11
1649	PHI:6199	BbCypA	Beauveria bassiana	unaffected pathogenicity	9	13	11	10	7	No	50
1650	PHI:286	CLC-A	Cryptococcus neoformans	reduced virulence	3	3	2	3	4	No	15
1651	PHI:269	RAS2	Ustilago maydis	loss of pathogenicity	0	0	0	1	0	No	1
1652	PHI:322;PHI:1064;PHI:7226	TPS1 Tps1	Magnaporthe oryzae	loss of pathogenicity reduced virulence	2	2	3	2	3	No	12
1653	PHI:3121	PSPTO 5240	Pseudomonas syringae	unaffected pathogenicity	1	1	1	1	1	No	5
1654	PHI:7337	HopI1	Magnaporthe oryzae	effector (plant avirulence determinant)	3	3	3	2	3	No	14
1655	PHI:6594	CarA	Pseudomonas syringae	reduced virulence	1	1	1	1	2	No	6
1656	PHI:3796	Pst-Lov	Pseudomonas syringae	reduced virulence	0	0	0	2	0	No	2
1657	PHI:7788	AldB (PSPTO 2673)	Pseudomonas syringae	reduced virulence	6	9	7	6	6	No	34
1658	PHI:7031	AlgD	Pseudomonas syringae	unaffected pathogenicity	1	1	1	1	1	No	5
1659	PHI:587	PSPTO0834	Pseudomonas syringae	unaffected pathogenicity	3	2	2	2	0	No	9
1660	PHI:7787	AldA (PSPTO 0092)	Pseudomonas syringae	reduced virulence	6	9	7	6	6	No	34
1661	PHI:7015	Crc	Pseudomonas syringae	reduced virulence	2	1	2	2	0	No	7
1662	PHI:3272	GlpD	Yersinia pestis	unaffected pathogenicity	1	1	1	1	1	No	5
1663	PHI:6319	PotA	Streptococcus pneumoniae	reduced virulence	6	7	9	6	11	No	39
1664	PHI:6321	PotC	Streptococcus pneumoniae	reduced virulence	0	0	1	1	0	No	2
1665	PHI:10917	BgaA	Streptococcus pneumoniae	reduced virulence	1	1	1	1	0	No	4
1666	PHI:10239	Rnc	Streptococcus mutans	reduced virulence unaffected pathogenicity	0	0	0	1	0	No	1
1667	PHI:10238	MntH	Streptococcus mutans	unaffected pathogenicity reduced virulence	1	2	2	3	4	No	12
1668	PHI:3101	BCKDH	Plasmodium falciparum	reduced virulence	3	3	3	3	1	No	13
1669	PHI:246	CPMK2	Claviceps purpurea	reduced virulence	4	5	2	3	3	No	17
1670	PHI:7228	Tre1	Magnaporthe oryzae	unaffected pathogenicity	1	0	1	1	0	No	3
1671	PHI:346	CRU1	Ustilago maydis	reduced virulence	15	13	11	10	9	No	58
1672	PHI:6069	Kpp4	Ustilago maydis	loss of pathogenicity	3	4	3	3	1	No	14
1673	PHI:244	CLAP1	Colletotrichum lindemuthianum	loss of pathogenicity	10	15	7	13	9	No	54
1674	PHI:301	FoSNF1	Fusarium oxysporum	reduced virulence	4	3	5	5	4	No	21
1675	PHI:8028	Tkt	Leishmania mexicana	loss of pathogenicity	1	1	1	1	1	No	5
1676	PHI:2636	TgCDPK3	Toxoplasma gondii	reduced virulence	8	7	4	7	8	No	34
1677	PHI:370	PKA2	Cryptococcus neoformans	reduced virulence	0	0	1	2	0	No	3
1678	PHI:2839	RED1	Bipolaris maydis	reduced virulence	1	1	1	1	1	No	5
1679	PHI:697	Ugt51E1	Leptosphaeria maculans	unaffected pathogenicity	2	2	2	2	2	No	10
1680	PHI:311	MGB1	Magnaporthe oryzae	loss of pathogenicity	9	11	9	7	12	No	48
1681	PHI:275	AOX1	Cryptococcus neoformans	reduced virulence	0	1	1	1	1	No	4
1682	PHI:3283	AmpG	Xanthomonas campestris	increased virulence (hypervirulence)	1	1	0	1	1	No	4
1683	PHI:9833	ClpX	Xanthomonas campestris	reduced virulence	4	4	4	4	4	No	20
1684	PHI:10726	ClpP	Xanthomonas campestris	reduced virulence	7	8	8	8	6	No	37
1685	PHI:2703	Xac3090	Xanthomonas axonopodis	effector (plant avirulence determinant)	1	1	0	2	0	No	4
1686	PHI:4145	XAC1722	Xanthomonas citri	reduced virulence	1	1	1	1	1	No	5
1687	PHI:3412	PstB	Xanthomonas citri	loss of pathogenicity	2	3	2	3	1	No	11
1688	PHI:6630	TreA	Xanthomonas citri	increased virulence (hypervirulence)	1	0	1	1	0	No	3
1689	PHI:981	HopI1	Pseudomonas syringae	effector (plant avirulence determinant)	4	3	4	4	4	No	19
1690	PHI:316;PHI:4606	PiGPB1	Phytophthora infestans	reduced virulence	11	7	11	14	4	No	47
1691	PHI:260	HDA1	Ustilago maydis	unaffected pathogenicity	2	1	4	3	2	No	12
1692	PHI:266	MGV1	Fusarium graminearum	reduced virulence loss of pathogenicity	1	1	1	1	1	No	5
1693	PHI:265	MET3	Cryptococcus neoformans	loss of pathogenicity	2	1	2	2	2	No	9
1694	PHI:4925	Hbr1	Candida albicans	reduced virulence	1	1	1	1	1	No	5
1695	PHI:259	GPI7	Candida albicans	reduced virulence	1	1	1	1	1	No	5
1696	PHI:254	FOW1	Fusarium oxysporum	reduced virulence	4	5	4	4	3	No	20
1697	PHI:320	SSN6	Candida albicans	reduced virulence	4	4	2	5	1	No	16
1698	PHI:10270	YbeY (atu0358)	Agrobacterium tumefaciens	reduced virulence	1	1	1	1	1	No	5
1699	PHI:680	PAK1	Cryptococcus neoformans	reduced virulence	5	4	4	4	3	No	20
1700	PHI:7760	Stk (ORF: z1444)	Escherichia coli	effector (plant avirulence determinant) reduced virulence	0	0	0	1	0	No	1
1701	PHI:10662	KatE	Ralstonia solanacearum	unaffected pathogenicity	0	1	1	1	1	No	4
1702	PHI:7323	RalA	Ralstonia solanacearum	loss of pathogenicity	2	2	2	3	3	No	12
1703	PHI:5171;PHI:10833	RSp0914	Ralstonia solanacearum	effector (plant avirulence determinant)	7	4	5	7	4	No	27
1704	PHI:5399	HpaG	Ralstonia solanacearum	reduced virulence	7	5	5	6	5	No	28
1705	PHI:5272	FabG2	Ralstonia solanacearum	reduced virulence	0	0	2	2	4	No	8
1706	PHI:5134;PHI:10837	RSc1801	Ralstonia solanacearum	effector (plant avirulence determinant)	7	8	8	8	4	No	35
1707	PHI:5133;PHI:5172;PHI:10836	RSc1800	Ralstonia solanacearum	effector (plant avirulence determinant)	6	5	4	3	4	No	22
1708	PHI:5135;PHI:10839	RSc1357	Ralstonia solanacearum	effector (plant avirulence determinant)	4	3	1	4	5	No	17
1709	PHI:5173;PHI:10838	RSc1356	Ralstonia solanacearum	effector (plant avirulence determinant)	6	5	6	9	4	No	30
1710	PHI:6298;PHI:6445	NucA	Ralstonia solanacearum	reduced virulence	0	1	1	1	1	No	4
1711	PHI:8677	RSc0454	Ralstonia solanacearum	loss of pathogenicity	1	1	1	1	1	No	5
1712	PHI:9821	PrfA (lmo2543)	Listeria monocytogenes	reduced virulence	3	4	2	3	2	No	14
1713	PHI:9216	VirB (lmo1747)	Listeria monocytogenes	reduced virulence unaffected pathogenicity	2	2	1	2	2	No	9
1714	PHI:7617	Lmo1722	Listeria monocytogenes	unaffected pathogenicity increased virulence (hypervirulence)	6	3	2	9	6	No	26
1715	PHI:3169	BM-LOV-HK	Brucella melitensis	reduced virulence	0	0	0	1	0	No	1
1716	PHI:9461	IroC	Salmonella enterica	reduced virulence	8	14	10	15	14	No	61
1717	PHI:609;PHI:616	SseA	Salmonella enterica	reduced virulence	1	1	1	1	1	No	5
1718	PHI:9460	EntA	Salmonella enterica	reduced virulence	1	2	1	3	0	No	7
1719	PHI:8898	CobB (Yp 1760)	Yersinia pestis	reduced virulence	1	1	2	1	1	No	6
1720	PHI:3878	Pnp	Salmonella enterica	reduced virulence	3	3	4	3	3	No	16
1721	PHI:6187	Pimt	Salmonella enterica	reduced virulence	0	0	0	2	0	No	2
1722	PHI:10048	FumC	Salmonella enterica	reduced virulence	1	1	1	2	1	No	6
1723	PHI:601	Orf48	Salmonella enterica	unaffected pathogenicity	1	1	0	1	1	No	4
1724	PHI:9092	YdiD	Salmonella enterica	reduced virulence	5	5	6	6	5	No	27
1725	PHI:2651	YedX	Salmonella enterica	unaffected pathogenicity	0	0	0	1	1	No	2
1726	PHI:3928	MacB	Salmonella enterica	reduced virulence	3	2	2	2	1	No	10
1727	PHI:196	ADE2	Candida albicans	reduced virulence	1	2	1	1	1	No	6
1728	PHI:195	VPS34	Candida albicans	loss of pathogenicity	3	3	3	5	5	No	19
1729	PHI:55	PKS1	Bipolaris maydis	reduced virulence	3	17	3	5	14	No	42
1730	PHI:130	TPS1	Candida albicans	reduced virulence	1	1	3	2	3	No	10
1731	PHI:2580;PHI:2601	Oligopeptidase B	Trypanosoma cruzi	reduced virulence	3	3	2	3	2	No	13
1732	PHI:2503;PHI:3902	AGS1	Aspergillus fumigatus	unaffected pathogenicity reduced virulence	2	3	0	3	1	No	9
1733	PHI:2504;PHI:3903	AGS2	Aspergillus fumigatus	unaffected pathogenicity reduced virulence	0	0	0	2	1	No	3
1734	PHI:509	AFT3	Alternaria alternata	loss of pathogenicity	4	3	4	4	1	No	16
1735	PHI:339	CLPT1	Colletotrichum lindemuthianum	reduced virulence	7	7	7	7	7	No	35
1736	PHI:387	UGD1	Cryptococcus neoformans	loss of pathogenicity	1	1	1	1	1	No	5
1737	PHI:181	PGX1	Fusarium oxysporum	unaffected pathogenicity	1	0	1	1	1	No	4
1738	PHI:235	VPH1	Cryptococcus neoformans	reduced virulence	1	1	1	1	1	No	5
1739	PHI:542	BCCAT2	Botrytis cinerea	unaffected pathogenicity	0	1	1	1	1	No	4
1740	PHI:3477	ArcT	Streptococcus pneumoniae	reduced virulence	3	4	2	3	1	No	13
1741	PHI:2734	MetF	Streptococcus pneumoniae	unaffected pathogenicity reduced virulence	1	0	1	1	1	No	4
1742	PHI:2733	MetE	Streptococcus pneumoniae	unaffected pathogenicity reduced virulence	2	1	0	1	1	No	5
1743	PHI:100	ADR1	Ustilago maydis	loss of pathogenicity	1	3	1	3	6	No	14
1744	PHI:7916	FabD	Staphylococcus aureus	reduced virulence	1	2	2	2	2	No	9
1745	PHI:7043	PmtA	Streptococcus pyogenes	reduced virulence	1	1	2	2	0	No	6
1746	PHI:5069	GacA	Streptococcus pyogenes	lethal	1	0	1	1	0	No	3
1747	PHI:6509	GloA	Streptococcus pyogenes	reduced virulence	3	1	0	2	2	No	8
1748	PHI:5347	WcbT	Burkholderia pseudomallei	reduced virulence	3	3	3	3	3	No	15
1749	PHI:512	CaNAG6	Candida albicans	reduced virulence	1	3	1	1	1	No	7
1750	PHI:216	HDC1	Bipolaris zeicola	reduced virulence	5	3	5	4	2	No	19
1751	PHI:310	MgAtr4	Zymoseptoria tritici	reduced virulence	12	10	8	11	6	No	47
1752	PHI:200	ARG1	Fusarium oxysporum	reduced virulence	1	1	1	1	1	No	5
1753	PHI:241	CAC1	Cryptococcus neoformans	loss of pathogenicity	10	2	4	4	5	No	25
1754	PHI:679	STE20a	Cryptococcus neoformans	unaffected pathogenicity lethal	0	1	1	1	0	No	3
1755	PHI:678	STE20alpha	Cryptococcus neoformans	unaffected pathogenicity lethal	3	1	1	1	1	No	7
1756	PHI:5562	Nrf1	Passalora fulva	unaffected pathogenicity	0	0	0	1	0	No	1
1757	PHI:280	CCN1	Cryptococcus neoformans	reduced virulence	4	6	7	7	1	No	25
1758	PHI:204	CaCDC35	Candida albicans	loss of pathogenicity	14	13	10	13	6	No	56
1759	PHI:476	STE11alpha	Cryptococcus neoformans	reduced virulence	4	6	3	7	4	No	24
1760	PHI:249	CYP1	Magnaporthe oryzae	reduced virulence	8	8	5	5	3	No	29
1761	PHI:220	MAN1	Cryptococcus neoformans	reduced virulence	1	1	2	1	1	No	6
1762	PHI:227	PKA1	Cryptococcus neoformans	reduced virulence loss of pathogenicity	1	2	1	1	2	No	7
1763	PHI:187	RUM1	Ustilago maydis	loss of pathogenicity	8	9	7	7	5	No	36
1764	PHI:184	RBT4	Candida albicans	reduced virulence	2	2	2	2	0	No	8
1765	PHI:161;PHI:545	BMP1	Botrytis cinerea	loss of pathogenicity	1	1	1	1	1	No	5
1766	PHI:215;PHI:2285;PHI:2827;PHI:6315;PHI:7240	FMK1 Fmk1	Fusarium oxysporum	loss of pathogenicity unaffected pathogenicity reduced virulence	0	0	0	1	0	No	1
1767	PHI:6080	Pnp	Pseudomonas aeruginosa	reduced virulence	3	3	3	4	3	No	16
1768	PHI:8939	Ndh (PA4538)	Pseudomonas aeruginosa	reduced virulence unaffected pathogenicity	2	2	2	2	1	No	9
1769	PHI:10781	PA4400	Pseudomonas aeruginosa	reduced virulence	0	0	0	2	1	No	3
1770	PHI:3788	PA4351	Pseudomonas aeruginosa	unaffected pathogenicity	3	3	2	4	3	No	15
1771	PHI:3284	Protease IV	Pseudomonas aeruginosa	increased virulence (hypervirulence)	0	1	2	2	0	No	5
1772	PHI:10780	PA3755	Pseudomonas aeruginosa	unaffected pathogenicity	0	1	1	1	1	No	4
1773	PHI:10779	PA3754	Pseudomonas aeruginosa	unaffected pathogenicity	1	0	1	1	1	No	4
1774	PHI:10606;PHI:10608	FadD1 PA0508	Pseudomonas aeruginosa	unaffected pathogenicity	6	6	7	9	8	No	36
1775	PHI:8940;PHI:11246	NqrF (PA2994) NqrF	Pseudomonas aeruginosa	unaffected pathogenicity increased virulence (hypervirulence)	2	2	2	2	2	No	10
1776	PHI:10242	Cif	Pseudomonas aeruginosa	reduced virulence	2	2	2	1	0	No	7
1777	PHI:10776	PA2769	Pseudomonas aeruginosa	unaffected pathogenicity	1	3	3	2	1	No	10
1778	PHI:8937	NuoI (PA2644)	Pseudomonas aeruginosa	unaffected pathogenicity reduced virulence	1	1	1	1	1	No	5
1779	PHI:11247	NuoG	Pseudomonas aeruginosa	unaffected pathogenicity	1	1	1	1	1	No	5
1780	PHI:7174	PA2567	Pseudomonas aeruginosa	reduced virulence	1	2	2	1	0	No	6
1781	PHI:6990	PvdG	Pseudomonas aeruginosa	loss of pathogenicity	2	2	1	2	2	No	9
1782	PHI:4717	PA2414	Pseudomonas aeruginosa	reduced virulence	0	0	1	1	0	No	2
1783	PHI:5059	PvdH	Pseudomonas aeruginosa	unaffected pathogenicity	6	7	7	7	6	No	33
1784	PHI:6213	ClpP	Pseudomonas aeruginosa	reduced virulence	7	8	9	7	6	No	37
1785	PHI:7633	PpiB	Pseudomonas aeruginosa	reduced virulence	0	0	0	1	0	No	1
1786	PHI:7016	Smc	Pseudomonas aeruginosa	reduced virulence	7	4	6	8	6	No	31
1787	PHI:6995	Flil	Pseudomonas aeruginosa	reduced virulence	1	1	1	1	1	No	5
1788	PHI:3291;PHI:5563;PHI:5585	PqsA	Pseudomonas aeruginosa	reduced virulence	1	1	1	1	2	No	6
1789	PHI:10775	PA0990	Pseudomonas aeruginosa	unaffected pathogenicity	1	1	2	2	1	No	7
1790	PHI:7999	PutA	Pseudomonas aeruginosa	reduced virulence	2	3	1	2	2	No	10
1791	PHI:7979	DspI	Pseudomonas aeruginosa	reduced virulence	7	7	6	6	5	No	31
1792	PHI:10608	PA0508	Pseudomonas aeruginosa	unaffected pathogenicity	2	3	1	3	2	No	11
1793	PHI:9599	PsCA1	Pseudomonas aeruginosa	reduced virulence	0	1	1	1	1	No	4
1794	PHI:3786	PA0005	Pseudomonas aeruginosa	increased virulence (hypervirulence)	1	1	1	1	1	No	5
1795	PHI:8623	Cab (NMB0789)	Neisseria meningitidis	unaffected pathogenicity	7	6	5	9	6	No	33
1796	PHI:6372	CspV	Vibrio cholerae	unaffected pathogenicity	1	0	1	1	1	No	4
1797	PHI:6583	LonA	Vibrio cholerae	reduced virulence	4	4	4	2	4	No	18
1798	PHI:9842	Pta	Vibrio cholerae	unaffected pathogenicity	1	1	1	1	1	No	5
1799	PHI:3059	YbeY	Vibrio cholerae	loss of pathogenicity	1	1	1	1	1	No	5
1800	PHI:8851	ToxA	Burkholderia glumae	reduced virulence	1	1	1	1	0	No	4
1801	PHI:2832	AKT3-1	Alternaria alternata	loss of pathogenicity	6	6	4	6	3	No	25
1802	PHI:440	PMR1	Candida albicans	reduced virulence	3	3	4	4	1	No	15
1803	PHI:240;PHI:2368;PHI:10311	BAC Bac	Botrytis cinerea	reduced virulence	3	5	3	4	5	No	20
1804	PHI:6192	CaIcl1	Candida albicans	reduced virulence	2	2	2	3	2	No	11
1805	PHI:162;PHI:485	CaFTR1 FTR1	Candida albicans	loss of pathogenicity	1	1	1	1	1	No	5
1806	PHI:213	CPA1	Cryptococcus neoformans	reduced virulence	6	5	7	9	6	No	33
1807	PHI:368	NOT4	Candida albicans	reduced virulence	1	1	2	1	0	No	5
1808	PHI:428	TPK2	Candida albicans	reduced virulence	3	2	4	3	0	No	12
1809	PHI:10475	GlgA	Chlamydia muridarum	reduced virulence	3	4	4	4	4	No	19
1810	PHI:9883	IcaA	Staphylococcus aureus	unaffected pathogenicity	1	1	1	1	0	No	4
1811	PHI:676	STE20alpha	Cryptococcus neoformans	lethal reduced virulence	3	2	1	2	1	No	9
1812	PHI:177	ODC	Parastagonospora nodorum	reduced virulence	1	1	1	1	3	No	7
1813	PHI:6484	CRP1	Candida albicans	reduced virulence	4	2	1	5	6	No	18
1814	PHI:11240	MoMca1 (MGG 04626)	Magnaporthe oryzae	reduced virulence	1	1	1	1	1	No	5
1815	PHI:202;PHI:1160;PHI:2309	BcatrB	Botrytis cinerea	unaffected pathogenicity reduced virulence chemistry target: sensitivity to chemical	35	31	26	10	12	No	114
1816	PHI:356	HEX1	Magnaporthe oryzae	reduced virulence	1	1	1	1	1	No	5
1817	PHI:267	MLT1	Candida albicans	reduced virulence	6	8	11	7	8	No	40
1818	PHI:2108	CAM	Magnaporthe oryzae	reduced virulence loss of pathogenicity	5	7	5	9	6	No	32
1819	PHI:5042	HmgA	Pseudomonas aeruginosa	increased virulence (hypervirulence) reduced virulence	1	1	1	1	0	No	4
1820	PHI:9279	Ram2	Candida albicans	unaffected pathogenicity	2	3	3	2	1	No	11
1821	PHI:178	PabaA	Aspergillus fumigatus	reduced virulence	3	2	1	3	2	No	11
1822	PHI:172	CRK1	Candida albicans	loss of pathogenicity	1	1	1	2	1	No	6
1823	PHI:157	TOXF	Bipolaris zeicola	loss of pathogenicity	2	2	2	1	2	No	9
1824	PHI:4155;PHI:8151	Stk	Streptococcus suis	reduced virulence	2	1	1	1	2	No	7
1825	PHI:9364	TGGT1 238950	Toxoplasma gondii	unaffected pathogenicity reduced virulence	0	0	0	1	0	No	1
1826	PHI:10898	GRA45 (TGGT1 315620)	Toxoplasma gondii	reduced virulence	1	1	1	1	1	No	5
1827	PHI:6718	Mapk2	Toxoplasma gondii	reduced virulence	2	2	2	3	2	No	11
1828	PHI:10890	Spy (TGGT1 273500)	Toxoplasma gondii	unaffected pathogenicity	11	9	6	13	5	No	44
1829	PHI:7792	TgDegP (TGME49 262920)	Toxoplasma gondii	unaffected pathogenicity reduced virulence	4	4	4	4	2	No	18
1830	PHI:7745	Dna-K-TPR (TGME49 202020)	Toxoplasma gondii	reduced virulence	1	0	0	1	1	No	3
1831	PHI:10166	HSD (TGME49 253960)	Toxoplasma gondii	increased virulence (hypervirulence)	0	0	0	1	0	No	1
1832	PHI:6703	CgRhoB	Colletotrichum gloeosporioides	reduced virulence	1	1	0	1	1	No	4
1833	PHI:3415	Fre2	Cryptococcus neoformans	reduced virulence	2	2	2	1	1	No	8
1834	PHI:10256	PrkC	Clostridioides difficile	unaffected pathogenicity	1	1	2	3	2	No	9
1835	PHI:7047	Aqp1	Cryptococcus neoformans	unaffected pathogenicity	3	3	3	1	1	No	11
1836	PHI:7562	CAL1	Alternaria alternata	reduced virulence	1	1	1	1	0	No	4
1837	PHI:6492	LipA	Acinetobacter baumannii	reduced virulence	2	2	2	2	1	No	9
1838	PHI:11207	ClpB	Acinetobacter baumannii	reduced virulence	2	3	5	3	3	No	16
1839	PHI:9285	TrxA	Acinetobacter baumannii	reduced virulence	7	6	6	9	5	No	33
1840	PHI:4194	AKT7	Alternaria alternata	increased virulence (hypervirulence) reduced virulence	2	3	2	1	1	No	9
1841	PHI:3835	Fgrho4	Fusarium graminearum	reduced virulence	1	1	0	1	1	No	4
1842	PHI:1626	GzTF2S001	Fusarium graminearum	unaffected pathogenicity	1	1	2	1	1	No	6
1843	PHI:1639	GzWing011	Fusarium graminearum	unaffected pathogenicity	4	2	3	3	4	No	16
1844	PHI:1230	FGSG 06959	Fusarium graminearum	lethal	3	6	8	5	6	No	28
1845	PHI:1583	GzOB023	Fusarium graminearum	unaffected pathogenicity	5	7	7	6	7	No	32
1846	PHI:9142	FgAP2a (FGSG 09735)	Fusarium graminearum	reduced virulence	3	3	3	3	2	No	14
1847	PHI:1594	GzOB034	Fusarium graminearum	unaffected pathogenicity	4	3	3	3	3	No	16
1848	PHI:4096	FoOCH1	Fusarium oxysporum	reduced virulence	3	2	3	2	1	No	11
1849	PHI:9266	FUM6	Fusarium proliferatum	reduced virulence	2	3	1	1	1	No	8
1850	PHI:9268	FUM19	Fusarium proliferatum	reduced virulence	5	6	6	6	4	No	27
1851	PHI:3090	PamA	Paenibacillus larvae	reduced virulence	1	2	1	2	2	No	8
1852	PHI:4989	Ppt1	Bipolaris oryzae	reduced virulence	1	1	1	1	1	No	5
1853	PHI:7143	FvCYP1	Fusarium verticillioides	reduced virulence	2	4	3	4	1	No	14
1854	PHI:7144	FvSCP1	Fusarium verticillioides	reduced virulence	2	2	2	2	0	No	8
1855	PHI:2916	Ppr2	Fusarium verticillioides	unaffected pathogenicity	1	1	1	1	1	No	5
1856	PHI:3053	FvHAP3	Fusarium verticillioides	reduced virulence	3	3	3	3	0	No	12
1857	PHI:7597	FvDim5	Fusarium verticillioides	reduced virulence	3	3	2	4	3	No	15
1858	PHI:5270	FvBck1	Fusarium verticillioides	reduced virulence	6	6	4	6	0	No	22
1859	PHI:7141	Fsr1	Fusarium verticillioides	reduced virulence	0	0	1	1	2	No	4
1860	PHI:9191	Fvset2 (FVEG 06937)	Fusarium verticillioides	reduced virulence	6	5	4	5	5	No	25
1861	PHI:3054	FvHAP5	Fusarium verticillioides	reduced virulence	2	1	2	3	2	No	10
1862	PHI:3389	FVEG 12521	Fusarium verticillioides	unaffected pathogenicity	2	2	2	2	2	No	10
1863	PHI:3385	FVEG 12529	Fusarium verticillioides	unaffected pathogenicity	1	1	0	1	2	No	5
1864	PHI:3387	FVEG 12523	Fusarium verticillioides	unaffected pathogenicity	1	1	1	1	0	No	4
1865	PHI:5391	FvSO	Fusarium verticillioides	loss of pathogenicity	1	1	1	2	0	No	5
1866	PHI:3383	FVEG 12531	Fusarium verticillioides	unaffected pathogenicity	1	1	1	1	1	No	5
1867	PHI:3386	FVEG 12528	Fusarium verticillioides	unaffected pathogenicity	1	1	0	2	1	No	5
1868	PHI:7286	FvCP02	Fusarium verticillioides	unaffected pathogenicity reduced virulence	0	0	0	2	0	No	2
1869	PHI:10294	UbiE	Staphylococcus aureus	unaffected pathogenicity	3	3	2	1	1	No	10
1870	PHI:10293;PHI:10292	CtaB	Staphylococcus aureus	unaffected pathogenicity increased virulence (hypervirulence)	1	1	1	2	1	No	6
1871	PHI:10277	NdhC	Staphylococcus aureus	increased virulence (hypervirulence)	2	1	1	2	1	No	7
1872	PHI:7541	FepC (VK055 1930)	Klebsiella pneumoniae	reduced virulence	6	4	3	7	4	No	24
1873	PHI:8964	LeuC	Klebsiella pneumoniae	reduced virulence	2	2	2	2	2	No	10
1874	PHI:8963	LeuB	Klebsiella pneumoniae	reduced virulence	3	2	2	2	2	No	11
1875	PHI:7485	EntA (VK055 1922)	Klebsiella pneumoniae	unaffected pathogenicity reduced virulence	3	3	4	3	1	No	14
1876	PHI:6653;PHI:7480	YbtS	Klebsiella pneumoniae	reduced virulence unaffected pathogenicity	1	1	0	1	2	No	5
1877	PHI:8965	LeuD	Klebsiella pneumoniae	reduced virulence	1	1	1	1	1	No	5
1878	PHI:4681	FoBck1	Fusarium oxysporum	reduced virulence	6	6	4	5	2	No	23
1879	PHI:4525	PFP1	Rhynchosporium commune	reduced virulence	4	5	3	3	1	No	16
1880	PHI:3025	RnPKS1	Rosellinia necatrix	unaffected pathogenicity	0	0	0	1	0	No	1
1881	PHI:5483	FTF1	Fusarium oxysporum	reduced virulence	0	0	0	0	1	No	1
1882	PHI:1242	FGSG 08631	Fusarium graminearum	unaffected pathogenicity	1	0	2	0	1	No	4
1883	PHI:6144	GalU	Listeria monocytogenes	reduced virulence	1	1	0	0	1	No	3
1884	PHI:6089	KatG	Acinetobacter nosocomialis	increased virulence (hypervirulence)	0	0	0	0	1	No	1
1885	PHI:8808	Lon	Salmonella enterica	increased virulence (hypervirulence)	2	2	2	0	2	No	8
1886	PHI:7296	PhzE1	Pseudomonas aeruginosa	reduced virulence	0	0	0	0	1	No	1
1887	PHI:6501	BglA3	Streptococcus pneumoniae	reduced virulence	1	0	1	0	1	No	3
1888	PHI:9188	BB RS07570 (BB1518)	Bordetella bronchiseptica	unaffected pathogenicity	1	0	1	0	1	No	3
1889	PHI:6956	GigX4	Xanthomonas oryzae	increased virulence (hypervirulence)	1	0	0	0	1	No	2
1890	PHI:7728	BxATG1	Bursaphelenchus xylophilus	reduced virulence	0	0	1	0	1	No	2
1891	PHI:7281	PsINV	Puccinia striiformis	reduced virulence	1	1	0	0	1	No	3
1892	PHI:10219	FAEA1 (VM1G 01793)	Valsa mali	reduced virulence	1	1	0	0	1	No	3
1893	PHI:11041	PKS31 (VM1G 07355)	Valsa mali	unaffected pathogenicity	0	0	0	0	1	No	1
1894	PHI:11181	Vam6 (orf 19.1567)	Candida albicans	reduced virulence	0	0	0	0	1	No	1
1895	PHI:10370	BcBGL6 (BCIN 10g02650)	Botrytis cinerea	reduced virulence	1	0	1	0	1	No	3
1896	PHI:10966	Idi	Pseudomonas savastanoi	reduced virulence	1	1	1	0	2	No	5
1897	PHI:11070	TssH	Ralstonia solanacearum	reduced virulence	0	0	0	0	1	No	1
1898	PHI:2332	PehA	Burkholderia glumae	unaffected pathogenicity	0	0	1	0	1	No	2
1899	PHI:2333	PehB	Burkholderia glumae	unaffected pathogenicity	0	0	0	0	1	No	1
1900	PHI:1037	Cla4	Claviceps purpurea	loss of pathogenicity	1	0	1	0	1	No	3
1901	PHI:8790	XopL	Xanthomonas campestris	effector (plant avirulence determinant)	0	0	0	0	1	No	1
1902	PHI:7590	Erg25A	Aspergillus fumigatus	unaffected pathogenicity	1	1	1	0	1	No	4
1903	PHI:7591	Erg25B	Aspergillus fumigatus	unaffected pathogenicity	1	1	1	0	1	No	4
1904	PHI:2289	BcBOA2	Botrytis cinerea	reduced virulence	0	0	0	0	1	No	1
1905	PHI:10772	Lac1	Cryptococcus gattii vgiii	reduced virulence	1	1	1	0	1	No	4
1906	PHI:6278	Ppe10	Mycobacterium marinum	reduced virulence	4	3	1	0	10	No	18
1907	PHI:3989	Cpkk3	Cryphonectria parasitica	unaffected pathogenicity	0	0	0	0	1	No	1
1908	PHI:6867	Ngt	Actinobacillus pleuropneumoniae	reduced virulence	0	0	0	0	1	No	1
1909	PHI:9803	Cyp51A	Aspergillus fumigatus	unaffected pathogenicity	0	0	0	0	1	No	1
1910	PHI:3147	RfaE	Glaesserella parasuis	reduced virulence	2	2	2	0	2	No	8
1911	PHI:9064	Cap (AFLA 018930)	Aspergillus flavus	reduced virulence unaffected pathogenicity	1	1	2	0	1	No	5
1912	PHI:9218	Ppci1 (AFLA 050760)	Aspergillus flavus	increased virulence (hypervirulence)	0	0	0	0	1	No	1
1913	PHI:2477	CYP1	Cryphonectria parasitica	reduced virulence	0	0	0	0	1	No	1
1914	PHI:2894	F-avi3342	Agrobacterium vitis	loss of pathogenicity	1	0	0	0	1	No	2
1915	PHI:9598	WbkE (BMI I539)	Brucella microti Brucella suis	increased virulence (hypervirulence) reduced virulence loss of pathogenicity	1	1	1	0	1	No	4
1916	PHI:9332	EscN	Citrobacter rodentium	reduced virulence	1	2	3	0	3	No	9
1917	PHI:2574;PHI:2595	Tc52	Trypanosoma cruzi	unaffected pathogenicity	1	1	0	0	2	No	4
1918	PHI:5302	Str1	Colletotrichum graminicola	reduced virulence	0	0	1	0	2	No	3
1919	PHI:9832	LmDUSP1 (LmxM.22.0250)	Leishmania mexicana	reduced virulence	0	0	0	0	1	No	1
1920	PHI:9487	MaChsI (XP 007814354.1)	Metarhizium acridum	unaffected pathogenicity	0	0	0	0	1	No	1
1921	PHI:9488	MaChsII (XP 007814507.1)	Metarhizium acridum	unaffected pathogenicity	0	0	0	0	1	No	1
1922	PHI:5429	Mero-Ime2	Metarhizium robertsii	unaffected pathogenicity	0	0	0	0	2	No	2
1923	PHI:415	IPMDH	Parastagonospora nodorum	loss of pathogenicity	0	1	0	0	1	No	2
1924	PHI:2932	NoxA	Alternaria alternata	unaffected pathogenicity loss of pathogenicity	0	0	0	0	1	No	1
1925	PHI:5190	MoPRX1	Magnaporthe oryzae	reduced virulence	1	1	1	0	1	No	4
1926	PHI:2095	Calcium-transporting ATPase 3	Magnaporthe oryzae	reduced virulence	1	1	1	0	2	No	5
1927	PHI:2191	MoCYP51B	Magnaporthe oryzae	unaffected pathogenicity	1	1	1	0	1	No	4
1928	PHI:2063;PHI:2110	MCNA MGG 07456.5	Magnaporthe oryzae	reduced virulence unaffected pathogenicity	0	0	0	0	1	No	1
1929	PHI:2098	Calcium-transporting ATPase 3	Magnaporthe oryzae	loss of pathogenicity	0	0	1	0	3	No	4
1930	PHI:9353	Leu2A (MGG 05223)	Magnaporthe oryzae	reduced virulence	1	0	1	0	1	No	3
1931	PHI:2087	Moatg26	Magnaporthe oryzae	unaffected pathogenicity	0	0	1	0	3	No	4
1932	PHI:5472	MoDeam	Magnaporthe oryzae	reduced virulence	0	0	0	0	1	No	1
1933	PHI:417;PHI:2120	MST7 MST7p	Magnaporthe oryzae	loss of pathogenicity	0	0	1	0	1	No	2
1934	PHI:6930	MoRAD18	Magnaporthe oryzae	unaffected pathogenicity	2	1	1	0	1	No	5
1935	PHI:4651	RbfC	Xanthomonas oryzae	unaffected pathogenicity	1	1	1	0	1	No	4
1936	PHI:7791	AroE (XOC 4333)	Xanthomonas oryzae	reduced virulence	1	1	0	0	1	No	3
1937	PHI:7865	CPAR2 303700	Candida parapsilosis	reduced virulence	1	1	1	0	1	No	4
1938	PHI:7864	CPAR2 200390	Candida parapsilosis	loss of pathogenicity reduced virulence	1	0	1	0	1	No	3
1939	PHI:2429;PHI:5045	Bbslt2 Slt2	Beauveria bassiana	reduced virulence	4	5	1	0	1	No	11
1940	PHI:6716	ChSte7	Colletotrichum higginsianum	loss of pathogenicity	0	0	1	0	3	No	4
1941	PHI:2448;PHI:2912	AaNoxA	Alternaria alternata	reduced virulence	0	0	0	0	1	No	1
1942	PHI:1537	MYT1	Fusarium graminearum	unaffected pathogenicity	0	0	0	0	1	No	1
1943	PHI:1220	FGSG 01271	Fusarium graminearum	lethal	0	0	0	0	2	No	2
1944	PHI:1628	FgFSR1	Fusarium graminearum	reduced virulence	0	0	2	0	2	No	4
1945	PHI:720	AUR1	Fusarium graminearum	unaffected pathogenicity	0	0	0	0	1	No	1
1946	PHI:1444	GzGATA002	Fusarium graminearum	unaffected pathogenicity	0	0	0	0	1	No	1
1947	PHI:5898	FGSG 03315	Fusarium graminearum	unaffected pathogenicity	0	0	0	0	1	No	1
1948	PHI:4041	Spt3	Fusarium graminearum	reduced virulence	1	0	1	0	1	No	3
1949	PHI:1585	GzOB025	Fusarium graminearum	unaffected pathogenicity	1	1	1	0	1	No	4
1950	PHI:1245	FGSG 07520	Fusarium graminearum	unaffected pathogenicity	1	1	1	0	1	No	4
1951	PHI:1411	GzC2H078	Fusarium graminearum	lethal	1	1	1	0	1	No	4
1952	PHI:1004;PHI:1179;PHI:3377	STE7 (Sc Ste7) FgSte7	Fusarium graminearum	loss of pathogenicity reduced virulence	0	0	0	0	1	No	1
1953	PHI:1617	GzssDB002	Fusarium graminearum	unaffected pathogenicity	0	1	1	0	1	No	3
1954	PHI:8912	FgVPS20 (FGSG 10883)	Fusarium graminearum	reduced virulence	1	1	1	0	1	No	4
1955	PHI:9040	Fgm1 (FGSG 10991)	Fusarium graminearum	reduced virulence	0	0	0	0	1	No	1
1956	PHI:10455	NoxC (FGSG 11195)	Fusarium graminearum	unaffected pathogenicity	1	1	1	0	1	No	4
1957	PHI:1440;PHI:5574	GzNot002 FgNOT3	Fusarium graminearum	reduced virulence	1	1	1	0	1	No	4
1958	PHI:2338	UhCna1	Ustilago hordei	reduced virulence	0	0	0	0	1	No	1
1959	PHI:9106	PksI	Alternaria alternata	reduced virulence	0	0	0	0	1	No	1
1960	PHI:3095	Ktr1	Beauveria bassiana	unaffected pathogenicity	2	2	2	0	5	No	11
1961	PHI:3825	Srx1	Cryptococcus neoformans	reduced virulence	1	1	0	0	1	No	3
1962	PHI:9998;PHI:10322	Atg1 (CNAG 05005)	Cryptococcus neoformans	unaffected pathogenicity reduced virulence	0	0	0	0	1	No	1
1963	PHI:10008;PHI:10331	Atg12 (CNAG 07645)	Cryptococcus neoformans	reduced virulence	0	0	1	0	1	No	2
1964	PHI:3670	VdATG12	Verticillium dahliae	unaffected pathogenicity	0	0	1	0	1	No	2
1965	PHI:6970	Copag1	Colletotrichum orbiculare	reduced virulence	0	1	1	0	1	No	3
1966	PHI:89	CNA1	Cryptococcus neoformans	loss of pathogenicity	0	0	0	0	1	No	1
1967	PHI:687	URA5	Cryptococcus neoformans	reduced virulence	0	0	0	0	1	No	1
1968	PHI:68	SAP1	Candida albicans	reduced virulence	1	1	0	0	1	No	3
1969	PHI:6783;PHI:6789;PHI:6811	Sap1	Candida albicans	reduced virulence unaffected pathogenicity	1	1	0	0	1	No	3
1970	PHI:72;PHI:6784;PHI:6790;PHI:6812	SAP2 Sap2	Candida albicans	reduced virulence loss of pathogenicity unaffected pathogenicity	0	0	0	0	1	No	1
1971	PHI:1109	Chs2	Ustilago maydis	reduced virulence	0	0	0	0	1	No	1
1972	PHI:236	WdCHS2	Exophiala dermatitidis	reduced virulence	0	0	0	0	1	No	1
1973	PHI:6274	Orn	Pseudomonas aeruginosa	reduced virulence	1	1	1	0	1	No	4
1974	PHI:115	PGX1	Bipolaris zeicola	unaffected pathogenicity	1	0	0	0	1	No	2
1975	PHI:6181	Bcmimp1	Botrytis cinerea	unaffected pathogenicity	0	0	0	0	1	No	1
1976	PHI:6506	ClbP	Escherichia coli	reduced virulence	0	0	0	0	1	No	1
1977	PHI:2247	Sch1	Parastagonospora nodorum	unaffected pathogenicity	1	1	1	0	1	No	4
1978	PHI:2438	MgFus3	Zymoseptoria tritici	loss of pathogenicity	0	0	0	0	2	No	2
1979	PHI:11161	SerB (BAB1 1410)	Brucella melitensis	reduced virulence	1	1	0	0	1	No	3
1980	PHI:5307	CapD	Enterococcus faecium	unaffected pathogenicity	1	1	0	0	1	No	3
1981	PHI:2880	AspA	Streptococcus pyogenes	reduced virulence	0	0	0	0	1	No	1
1982	PHI:3866	IDH	Penicillium expansum	reduced virulence	1	1	1	0	1	No	4
1983	PHI:2384	Ust1	Ustilago maydis	reduced virulence	0	1	0	0	1	No	2
1984	PHI:2240;PHI:4586	Srt1	Ustilago maydis	reduced virulence	0	0	0	0	1	No	1
1985	PHI:2381	Ucn1	Ustilago maydis	loss of pathogenicity reduced virulence	2	1	2	0	1	No	6
1986	PHI:3919	Fer1	Ustilago maydis	reduced virulence	0	0	0	0	1	No	1
1987	PHI:6575;PHI:6574	AvrAC (XopAC)	Xanthomonas campestris	effector (plant avirulence determinant)	3	5	4	0	1	No	13
1988	PHI:2365	Hog1	Bipolaris maydis	reduced virulence	0	0	0	0	1	No	1
1989	PHI:9261	PakA (Afu2g04680)	Aspergillus fumigatus	reduced virulence	0	0	0	0	3	No	3
1990	PHI:3045	CHSA	Aspergillus fumigatus	unaffected pathogenicity	0	0	0	0	1	No	1
1991	PHI:3904	AGS3	Aspergillus fumigatus	reduced virulence	0	0	0	0	1	No	1
1992	PHI:4895	AspD	Aspergillus fumigatus	unaffected pathogenicity	0	0	0	0	1	No	1
1993	PHI:7755;PHI:8601;PHI:9392	Cofilin (AFUA 5G10570) Co<U+FB01>lin (AFUA 5G10570)	Aspergillus fumigatus	unaffected pathogenicity reduced virulence increased virulence (hypervirulence)	0	0	0	0	1	No	1
1994	PHI:7699	Smp	Pseudomonas syringae	unaffected pathogenicity	1	1	1	0	1	No	4
1995	PHI:2079	Moatg12	Magnaporthe oryzae	loss of pathogenicity	0	0	1	0	1	No	2
1996	PHI:3807	Gpx3	Candida albicans	unaffected pathogenicity	0	0	0	0	1	No	1
1997	PHI:2554	Rck2	Candida albicans	reduced virulence	0	1	3	0	1	No	5
[truncated: 7,267 more rows]
